# Supplementary material for: A Triple-Band Broadband Miniature Antenna Design for Implantable Continuous Glucose Monitoring
Source: Hindawi journal article supplement (doi:10.1155/2023/8123177), 2023-10-13
Supplement: f1 [file 8123177.f1.zip]

Archive with 12 entries (12 files):
- Figure2 (1).txt
- Figure3(a) (1).txt
- Figure3(b) (1).txt
- Figure3(c) (1).txt
- Figure3(d) (1).txt
- Figure5(a) (1).txt
- Figure5(b) (1).txt
- Figure5(c) (1).txt
- Figure7(b) (1).txt
- Figure9(a) (1).txt
- Figure9(b) (1).txt
- Figure9(c) (1).txt
