# Supplementary material for: A Triple-Band Broadband Miniature Antenna Design for Implantable Continuous Glucose Monitoring
Source: Hindawi journal article supplement (doi:10.1155/2023/8123177), 2023-10-13
Supplement: f1 [file 8123177.f1.zip › Figure2 (1).txt]

Freq [GHz]	dB(S(1,1))	dB(S(1,1))	dB(S(1,1))	dB(S(1,1)) []
0.5	-1.76689	-2.1294	-2.0581	-2.08343
0.51	-1.71118	-2.07686	-2.00577	-2.0312
0.52	-1.65785	-2.02767	-1.95734	-1.98291
0.53	-1.60676	-1.98172	-1.91279	-1.93854
0.54	-1.5578	-1.93889	-1.87212	-1.89813
0.55	-1.51086	-1.89907	-1.83536	-1.8617
0.56	-1.46583	-1.86219	-1.80258	-1.82932
0.57	-1.42262	-1.82816	-1.77386	-1.80111
0.58	-1.38113	-1.79689	-1.74934	-1.77721
0.59	-1.34127	-1.76834	-1.72918	-1.75779
0.6	-1.30296	-1.74244	-1.71361	-1.74311
0.61	-1.26614	-1.71915	-1.70289	-1.73344
0.62	-1.23071	-1.69842	-1.69738	-1.72918
0.63	-1.19661	-1.68023	-1.69747	-1.73075
0.64	-1.16379	-1.66454	-1.70369	-1.73873
0.65	-1.13217	-1.65135	-1.71666	-1.75377
0.66	-1.1017	-1.64064	-1.73712	-1.77672
0.67	-1.07232	-1.63242	-1.76602	-1.80857
0.68	-1.04398	-1.62668	-1.80447	-1.85057
0.69	-1.01664	-1.62343	-1.85386	-1.90423
0.7	-0.99024	-1.62271	-1.91588	-1.97144
0.71	-0.96475	-1.62454	-1.99264	-2.0545
0.72	-0.94011	-1.62894	-2.08674	-2.15632
0.73	-0.9163	-1.63597	-2.2014	-2.28051
0.74	-0.89328	-1.64568	-2.34068	-2.4316
0.75	-0.87101	-1.65812	-2.50966	-2.61533
0.76	-0.84945	-1.67336	-2.71479	-2.83898
0.77	-0.82858	-1.69148	-2.96423	-3.11183
0.78	-0.80837	-1.71256	-3.26843	-3.44578
0.79	-0.78879	-1.7367	-3.64078	-3.85617
0.8	-0.76982	-1.764	-4.09857	-4.36288
0.81	-0.75143	-1.79457	-4.66427	-4.99185
0.82	-0.7336	-1.82853	-5.36735	-5.77738
0.83	-0.71632	-1.86603	-6.24709	-6.76558
0.84	-0.69957	-1.90721	-7.35701	-8.02029
0.85	-0.68334	-1.95222	-8.77273	-9.63364
0.86	-0.66762	-2.00123	-10.60633	-11.74538
0.87	-0.6524	-2.05442	-13.03067	-14.56748
0.88	-0.63768	-2.112	-16.2825	-18.27023
0.89	-0.62349	-2.17415	-20.13213	-21.25512
0.9	-0.60981	-2.24111	-20.80126	-19.19599
0.91	-0.59669	-2.3131	-17.41408	-15.73882
0.92	-0.58416	-2.39038	-14.32024	-13.10801
0.93	-0.57228	-2.4732	-12.06145	-11.19354
0.94	-0.56112	-2.56184	-10.39968	-9.76936
0.95	-0.55079	-2.65659	-9.14722	-8.68643
0.96	-0.54144	-2.75774	-8.18494	-7.84994
0.97	-0.53326	-2.86561	-7.43583	-7.19738
0.98	-0.52654	-2.98053	-6.84806	-6.68587
0.99	-0.52164	-3.10282	-6.38546	-6.28511
1	-0.5191	-3.23283	-6.02209	-5.97313
1.01	-0.51964	-3.37091	-5.73894	-5.73373
1.02	-0.52427	-3.51739	-5.52184	-5.55478
1.03	-0.53442	-3.67263	-5.36013	-5.42716
1.04	-0.55212	-3.83696	-5.24569	-5.34393
1.05	-0.58021	-4.0107	-5.17236	-5.29985
1.06	-0.6227	-4.19414	-5.13539	-5.29091
1.07	-0.68511	-4.38756	-5.13121	-5.31416
1.08	-0.77463	-4.59116	-5.15709	-5.36739
1.09	-0.89963	-4.8051	-5.21102	-5.44905
1.1	-1.06735	-5.02944	-5.29155	-5.55811
1.11	-1.27789	-5.26417	-5.39769	-5.69396
1.12	-1.5145	-5.50912	-5.52881	-5.85632
1.13	-1.73663	-5.76395	-5.68461	-6.04526
1.14	-1.89112	-6.02814	-5.86502	-6.26104
1.15	-1.94388	-6.30092	-6.07019	-6.50417
1.16	-1.90141	-6.58121	-6.30044	-6.7753
1.17	-1.79803	-6.8676	-6.55618	-7.07519
1.18	-1.66961	-7.15826	-6.83794	-7.40469
1.19	-1.54	-7.4509	-7.14622	-7.7646
1.2	-1.42092	-7.74272	-7.48148	-8.15563
1.21	-1.31637	-8.03038	-7.84406	-8.57822
1.22	-1.22653	-8.31001	-8.23398	-9.03239
1.23	-1.14998	-8.57722	-8.65086	-9.51737
1.24	-1.08486	-8.82723	-9.0936	-10.03123
1.25	-1.02933	-9.05506	-9.56014	-10.57029
1.26	-0.98181	-9.25575	-10.04695	-11.12829
1.27	-0.94095	-9.4247	-10.54854	-11.69535
1.28	-0.90563	-9.558	-11.05676	-12.25686
1.29	-0.87498	-9.6528	-11.56013	-12.79242
1.3	-0.84826	-9.70757	-12.04326	-13.27567
1.31	-0.82489	-9.72222	-12.48681	-13.67588
1.32	-0.80439	-9.69815	-12.8684	-13.96219
1.33	-0.78636	-9.63806	-13.16497	-14.11026
1.34	-0.7705	-9.54569	-13.35657	-14.10916
1.35	-0.75653	-9.42546	-13.43072	-13.96482
1.36	-0.74425	-9.28216	-13.38558	-13.69801
1.37	-0.73346	-9.1206	-13.23037	-13.33801
1.38	-0.72402	-8.94541	-12.98287	-12.91559
1.39	-0.71581	-8.7608	-12.66518	-12.45803
1.4	-0.70871	-8.57054	-12.2997	-11.98692
1.41	-0.70263	-8.37788	-11.90631	-11.51792
1.42	-0.69751	-8.18553	-11.50109	-11.06169
1.43	-0.69327	-7.99574	-11.09617	-10.62498
1.44	-0.68987	-7.81033	-10.70021	-10.21177
1.45	-0.68726	-7.63071	-10.31906	-9.8241
1.46	-0.6854	-7.45797	-9.95642	-9.46269
1.47	-0.68426	-7.29292	-9.61448	-9.12742
1.48	-0.68381	-7.13612	-9.29428	-8.81763
1.49	-0.68404	-6.98793	-8.99614	-8.53231
1.5	-0.68493	-6.84854	-8.71984	-8.27025
1.51	-0.68646	-6.71797	-8.46481	-8.03011
1.52	-0.68863	-6.59611	-8.23026	-7.81046
1.53	-0.69144	-6.48274	-8.01524	-7.60983
1.54	-0.69487	-6.37748	-7.81868	-7.42672
1.55	-0.69894	-6.27989	-7.63943	-7.25956
1.56	-0.70364	-6.18938	-7.4763	-7.10678
1.57	-0.70899	-6.10527	-7.32801	-6.96676
1.58	-0.71499	-6.02676	-7.19326	-6.83782
1.59	-0.72165	-5.95298	-7.07066	-6.71828
1.6	-0.729	-5.88296	-6.95879	-6.60644
1.61	-0.73704	-5.81567	-6.85615	-6.50062
1.62	-0.7458	-5.75003	-6.76122	-6.39919
1.63	-0.7553	-5.68497	-6.67244	-6.30062
1.64	-0.76557	-5.61944	-6.58826	-6.20352
1.65	-0.77664	-5.55248	-6.50715	-6.1067
1.66	-0.78854	-5.48322	-6.42767	-6.00921
1.67	-0.80131	-5.41099	-6.34849	-5.91037
1.68	-0.81499	-5.33528	-6.26848	-5.80981
1.69	-0.82963	-5.25583	-6.18672	-5.70742
1.7	-0.84526	-5.17257	-6.10253	-5.60339
1.71	-0.86196	-5.08567	-6.01555	-5.49813
1.72	-0.87978	-4.99551	-5.92568	-5.39226
1.73	-0.89879	-4.90261	-5.83314	-5.28651
1.74	-0.91905	-4.80765	-5.73835	-5.18172
1.75	-0.94065	-4.71137	-5.64199	-5.07875
1.76	-0.96368	-4.61457	-5.54487	-4.97845
1.77	-0.98823	-4.51803	-5.44792	-4.88164
1.78	-1.01441	-4.42252	-5.35212	-4.78909
1.79	-1.04233	-4.32876	-5.25846	-4.70149
1.8	-1.07213	-4.23738	-5.16792	-4.61943
1.81	-1.10394	-4.14896	-5.08141	-4.54347
1.82	-1.13792	-4.06398	-4.99977	-4.47407
1.83	-1.17423	-3.98284	-4.92376	-4.41166
1.84	-1.21308	-3.90588	-4.85408	-4.35662
1.85	-1.25465	-3.83334	-4.79133	-4.30929
1.86	-1.29919	-3.76546	-4.73606	-4.27
1.87	-1.34694	-3.70236	-4.68876	-4.23908
1.88	-1.39817	-3.64419	-4.64988	-4.21687
1.89	-1.4532	-3.59102	-4.61985	-4.20371
1.9	-1.51235	-3.54291	-4.59908	-4.19999
1.91	-1.57599	-3.49993	-4.58798	-4.20613
1.92	-1.64452	-3.4621	-4.58697	-4.22261
1.93	-1.71838	-3.42947	-4.59649	-4.24994
1.94	-1.79805	-3.40207	-4.61704	-4.28872
1.95	-1.88404	-3.37995	-4.64913	-4.33961
1.96	-1.9769	-3.36317	-4.69334	-4.40335
1.97	-2.07722	-3.35178	-4.75031	-4.48078
1.98	-2.18564	-3.34588	-4.82074	-4.57282
1.99	-2.30281	-3.34556	-4.90542	-4.68051
2	-2.42938	-3.35094	-5.0052	-4.80496
2.01	-2.56603	-3.36215	-5.11143	-4.93445
2.02	-2.71339	-3.37937	-5.2348	-5.0852
2.03	-2.87204	-3.40278	-5.37678	-5.25948
2.04	-3.04246	-3.43259	-5.53901	-5.45984
2.05	-3.22498	-3.46905	-5.7232	-5.68911
2.06	-3.41968	-3.51244	-5.93118	-5.95047
2.07	-3.62634	-3.56305	-6.16487	-6.2475
2.08	-3.84432	-3.62122	-6.42627	-6.58421
2.09	-4.07246	-3.68734	-6.71745	-6.96513
2.1	-4.30897	-3.7618	-7.04048	-7.3954
2.11	-4.55133	-3.84506	-7.39738	-7.88092
2.12	-4.79622	-3.9376	-7.79003	-8.42846
2.13	-5.03953	-4.03994	-8.22002	-9.04594
2.14	-5.27645	-4.15267	-8.68842	-9.74266
2.15	-5.50165	-4.27639	-9.19544	-10.52971
2.16	-5.70964	-4.41176	-9.73991	-11.42036
2.17	-5.89519	-4.55948	-10.3185	-12.43054
2.18	-6.05385	-4.72029	-10.92456	-13.57891
2.19	-6.18241	-4.89498	-11.54663	-14.8857
2.2	-6.2793	-5.08438	-12.16655	-16.36715
2.21	-6.34469	-5.28936	-12.75767	-18.01666
2.22	-6.38046	-5.51082	-13.28436	-19.74902
2.23	-6.38993	-5.74967	-13.70455	-21.27637
2.24	-6.37737	-6.00687	-13.97712	-22.03494
2.25	-6.34758	-6.28335	-14.0733	-21.63822
2.26	-6.30548	-6.58003	-13.98685	-20.43038
2.27	-6.25573	-6.89781	-13.73631	-18.98492
2.28	-6.20255	-7.23747	-13.35774	-17.6082
2.29	-6.14959	-7.59968	-12.89296	-16.39389
2.3	-6.09987	-7.98486	-12.38015	-15.35122
2.31	-6.05587	-8.39316	-11.84926	-14.46464
2.32	-6.01953	-8.82422	-11.32152	-13.71428
2.33	-5.99237	-9.27703	-10.81083	-13.08206
2.34	-5.97554	-9.74964	-10.32577	-12.55308
2.35	-5.96991	-10.23874	-9.87129	-12.11563
2.36	-5.97613	-10.73928	-9.45012	-11.76084
2.37	-5.99469	-11.24381	-9.06374	-11.48232
2.38	-6.02596	-11.7419	-8.71312	-11.27599
2.39	-6.07023	-12.21961	-8.39928	-11.14001
2.4	-6.12772	-12.65938	-8.12379	-11.07489
2.41	-6.19862	-13.04061	-7.88928	-11.08384
2.42	-6.28308	-13.34148	-7.70009	-11.17326
2.43	-6.38121	-13.54208	-7.56311	-11.35333
2.44	-6.49306	-13.62826	-7.48905	-11.63824
2.45	-6.61863	-13.59492	-7.49422	-12.0445
2.46	-6.7578	-13.44725	-7.60295	-12.58346
2.47	-6.9103	-13.19923	-7.85042	-13.24001
2.48	-7.07564	-12.87028	-8.28361	-13.93069
2.49	-7.25299	-12.48145	-8.95327	-14.47252
2.5	-7.44107	-12.05239	-9.8749	-14.67178
2.51	-7.63799	-11.59973	-10.916	-14.52683
2.52	-7.84101	-11.13656	-11.63661	-14.23396
2.53	-8.04625	-10.6726	-11.50496	-13.98254
2.54	-8.24843	-10.2148	-10.60947	-13.85758
2.55	-8.44044	-9.76791	-9.49002	-13.87068
2.56	-8.61307	-9.33507	-8.48197	-14.00458
2.57	-8.75482	-8.91826	-7.66873	-14.2357
2.58	-8.85189	-8.51866	-7.0337	-14.54143
2.59	-8.8888	-8.13691	-6.53922	-14.90087
2.6	-8.84945	-7.77325	-6.15092	-15.29339
2.61	-8.71893	-7.42771	-5.84243	-15.6968
2.62	-8.48562	-7.10012	-5.59457	-16.08592
2.63	-8.14331	-6.79024	-5.39361	-16.43203
2.64	-7.69273	-6.49771	-5.22971	-16.70426
2.65	-7.14286	-6.22213	-5.09578	-16.8732
2.66	-6.51308	-5.96305	-4.98667	-16.91642
2.67	-5.83892	-5.71995	-4.89859	-16.82388
2.68	-5.18532	-5.49232	-4.82875	-16.60039
2.69	-4.66918	-5.27955	-4.77507	-16.26367
2.7	-4.47557	-5.08105	-4.73602	-15.83904
2.71	-4.80879	-4.89618	-4.7105	-15.35355
2.72	-5.73231	-4.72428	-4.69769	-14.83163
2.73	-7.03691	-4.56467	-4.69708	-14.29303
2.74	-8.32282	-4.41668	-4.70833	-13.75245
2.75	-9.21458	-4.27963	-4.73128	-13.22014
2.76	-9.55333	-4.15285	-4.76593	-12.70287
2.77	-9.42852	-4.03569	-4.81242	-12.20479
2.78	-9.03084	-3.92751	-4.87098	-11.72828
2.79	-8.51676	-3.8277	-4.94196	-11.27444
2.8	-7.97708	-3.73567	-5.02578	-10.84361
2.81	-7.45542	-3.65087	-5.12292	-10.43559
2.82	-6.96975	-3.57278	-5.23393	-10.04994
2.83	-6.52562	-3.50091	-5.35932	-9.68604
2.84	-6.12299	-3.43481	-5.4996	-9.34326
2.85	-5.75949	-3.37404	-5.65514	-9.02098
2.86	-5.43195	-3.31822	-5.82612	-8.71867
2.87	-5.13705	-3.26697	-6.01237	-8.4359
2.88	-4.87163	-3.21998	-6.21324	-8.17236
2.89	-4.6328	-3.17693	-6.42732	-7.92787
2.9	-4.41796	-3.13753	-6.65223	-7.7024
2.91	-4.22479	-3.10153	-6.88426	-7.49599
2.92	-4.05123	-3.0687	-7.11811	-7.30883
2.93	-3.89546	-3.03882	-7.34663	-7.14114
2.94	-3.75585	-3.01168	-7.56076	-6.99318
2.95	-3.63096	-2.98711	-7.74991	-6.86521
2.96	-3.51952	-2.96494	-7.90273	-6.75744
2.97	-3.42039	-2.94502	-8.0085	-6.67
2.98	-3.33255	-2.92721	-8.05892	-6.60292
2.99	-3.25511	-2.91138	-8.04974	-6.55613
3	-3.18725	-2.89741	-7.98192	-6.52945
3.01	-3.12827	-2.8852	-7.86155	-6.52267
3.02	-3.07753	-2.87464	-7.69885	-6.53555
3.03	-3.03446	-2.86563	-7.50633	-6.56794
3.04	-2.99857	-2.8581	-7.29705	-6.61978
3.05	-2.96941	-2.85197	-7.08307	-6.69124
3.06	-2.9466	-2.84715	-6.87459	-6.78272
3.07	-2.92979	-2.84358	-6.67965	-6.89486
3.08	-2.91871	-2.84119	-6.5042	-7.02859
3.09	-2.9131	-2.83992	-6.35233	-7.18499
3.1	-2.91275	-2.83972	-6.22674	-7.36519
3.11	-2.9175	-2.84053	-6.12906	-7.57013
3.12	-2.92722	-2.8423	-6.06023	-7.80012
3.13	-2.94181	-2.84499	-6.02074	-8.05427
3.14	-2.96121	-2.84854	-6.01092	-8.32955
3.15	-2.98541	-2.85292	-6.03105	-8.6196
3.16	-3.0144	-2.85809	-6.08151	-8.91323
3.17	-3.04825	-2.86402	-6.16288	-9.19299
3.18	-3.08702	-2.87067	-6.276	-9.43456
3.19	-3.13085	-2.87802	-6.422	-9.6082
3.2	-3.17989	-2.88604	-6.60229	-9.68355
3.21	-3.23434	-2.89471	-6.81855	-9.63755
3.22	-3.29446	-2.90403	-7.07263	-9.4625
3.23	-3.36053	-2.91397	-7.36633	-9.16952
3.24	-3.43289	-2.92455	-7.7011	-8.78502
3.25	-3.51195	-2.93576	-8.07735	-8.34237
3.26	-3.59815	-2.94762	-8.49353	-7.87371
3.27	-3.69202	-2.96015	-8.94438	-7.40487
3.28	-3.79415	-2.97339	-9.41857	-6.95391
3.29	-3.90519	-2.98737	-9.89526	-6.53179
3.3	-4.0259	-3.00215	-10.34059	-6.14397
3.31	-4.15711	-3.01781	-10.70601	-5.79212
3.32	-4.29975	-3.03442	-10.9329	-5.47548
3.33	-4.45487	-3.05207	-10.96733	-5.19193
3.34	-4.62361	-3.07088	-10.78158	-4.93863
3.35	-4.80726	-3.09097	-10.38854	-4.71254
3.36	-5.00724	-3.11248	-9.83627	-4.5106
3.37	-5.2251	-3.13556	-9.18758	-4.32998
3.38	-5.46256	-3.16037	-8.50037	-4.16806
3.39	-5.72151	-3.18709	-7.81804	-4.02252
3.4	-6.00402	-3.21588	-7.16847	-3.89132
3.41	-6.31233	-3.24694	-6.56709	-3.77265
3.42	-6.64887	-3.28044	-6.02058	-3.66498
3.43	-7.0163	-3.31655	-5.52992	-3.56695
3.44	-7.41742	-3.35543	-5.0926	-3.4774
3.45	-7.85523	-3.39724	-4.70407	-3.39533
3.46	-8.33286	-3.44211	-4.35864	-3.31988
3.47	-8.8535	-3.49013	-4.05002	-3.2503
3.48	-9.42026	-3.54138	-3.77171	-3.18595
3.49	-10.03593	-3.5959	-3.51714	-3.12626
3.5	-10.70253	-3.65372	-3.27986	-3.07074
