# Supplementary material for: A Triple-Band Broadband Miniature Antenna Design for Implantable Continuous Glucose Monitoring
Source: Hindawi journal article supplement (doi:10.1155/2023/8123177), 2023-10-13
Supplement: f1 [file 8123177.f1.zip › Figure3(a) (1).txt]

Freq [GHz]	dB(S(1,1))	dB(S(1,1))	dB(S(1,1))	dB(S(1,1))
0.5	-0.91494	-0.67596	-2.09912	-1.99986
0.51	-0.89779	-0.65413	-2.04733	-1.94203
0.52	-0.88476	-0.63485	-1.99956	-1.88755
0.53	-0.8761	-0.61821	-1.95581	-1.83632
0.54	-0.87216	-0.60433	-1.91611	-1.78826
0.55	-0.87339	-0.59335	-1.88051	-1.74331
0.56	-0.88037	-0.5855	-1.84908	-1.70141
0.57	-0.89383	-0.58104	-1.82195	-1.66254
0.58	-0.91473	-0.58034	-1.79928	-1.62667
0.59	-0.94427	-0.58382	-1.78127	-1.59378
0.6	-0.98403	-0.59207	-1.76818	-1.56389
0.61	-1.03602	-0.6058	-1.76033	-1.53703
0.62	-1.10286	-0.62591	-1.7581	-1.51324
0.63	-1.188	-0.65356	-1.76199	-1.4926
0.64	-1.29597	-0.69022	-1.77259	-1.4752
0.65	-1.43278	-0.73777	-1.7906	-1.46117
0.66	-1.60651	-0.79866	-1.8169	-1.45069
0.67	-1.82802	-0.87607	-1.85256	-1.44394
0.68	-2.11203	-0.97414	-1.89887	-1.4412
0.69	-2.47849	-1.09841	-1.95744	-1.44277
0.7	-2.95446	-1.2562	-2.03022	-1.44906
0.71	-3.57619	-1.45739	-2.11964	-1.46053
0.72	-4.39122	-1.71534	-2.22872	-1.47779
0.73	-5.45875	-2.04825	-2.3612	-1.50156
0.74	-6.84331	-2.48103	-2.52178	-1.53277
0.75	-8.58264	-3.04784	-2.71639	-1.57253
0.76	-10.56478	-3.79554	-2.95251	-1.62226
0.77	-12.19894	-4.78833	-3.23966	-1.68376
0.78	-12.4118	-6.11358	-3.59001	-1.75928
0.79	-11.19263	-7.88711	-4.0192	-1.8517
0.8	-9.5868	-10.23907	-4.54747	-1.96475
0.81	-8.16332	-13.13747	-5.20129	-2.10323
0.82	-7.02815	-15.39254	-6.01573	-2.27342
0.83	-6.14908	-14.52135	-7.03837	-2.48356
0.84	-5.47289	-11.98822	-8.33625	-2.74458
0.85	-4.95308	-9.74464	-10.00912	-3.07098
0.86	-4.55379	-8.04317	-12.21688	-3.48217
0.87	-4.24837	-6.76972	-15.23339	-4.00418
0.88	-4.01723	-5.80572	-19.43828	-4.67202
0.89	-3.84598	-5.06514	-23.17155	-5.53298
0.9	-3.72406	-4.48831	-20.1901	-6.65142
0.91	-3.6437	-4.03369	-16.21599	-8.11626
0.92	-3.59922	-3.67196	-13.42486	-10.05262
0.93	-3.58652	-3.38207	-11.44479	-12.63037
0.94	-3.60269	-3.1487	-9.98533	-15.96029
0.95	-3.6458	-2.96053	-8.87915	-19.00092
0.96	-3.71468	-2.80911	-8.02518	-18.19613
0.97	-3.80879	-2.68805	-7.35842	-15.24294
0.98	-3.92818	-2.59248	-6.83491	-12.77348
0.99	-4.07339	-2.51868	-6.42376	-10.97342
1	-4.24542	-2.46377	-6.10267	-9.66306
1.01	-4.44579	-2.42554	-5.85521	-8.6971
1.02	-4.67646	-2.40231	-5.66908	-7.97849
1.03	-4.93991	-2.39278	-5.53499	-7.44253
1.04	-5.23921	-2.396	-5.44588	-7.04512
1.05	-5.57805	-2.41129	-5.39635	-6.75547
1.06	-5.96087	-2.4382	-5.3823	-6.55163
1.07	-6.39299	-2.47646	-5.40062	-6.41772
1.08	-6.88085	-2.52601	-5.44899	-6.34207
1.09	-7.4322	-2.5869	-5.52574	-6.31602
1.1	-8.05657	-2.65936	-5.62966	-6.3331
1.11	-8.76573	-2.74376	-5.76001	-6.38844
1.12	-9.57442	-2.8406	-5.91635	-6.47834
1.13	-10.50143	-2.95051	-6.09852	-6.59998
1.14	-11.57085	-3.07427	-6.3066	-6.75119
1.15	-12.81361	-3.21281	-6.54083	-6.93027
1.16	-14.26796	-3.36723	-6.80157	-7.13581
1.17	-15.9737	-3.53876	-7.08924	-7.3666
1.18	-17.93883	-3.72886	-7.40429	-7.62149
1.19	-20.00126	-3.93915	-7.74704	-7.89923
1.2	-21.46968	-4.17149	-8.11765	-8.19839
1.21	-21.26092	-4.42796	-8.51593	-8.51715
1.22	-19.59192	-4.71094	-8.94111	-8.85316
1.23	-17.56737	-5.02305	-9.39162	-9.20332
1.24	-15.70976	-5.36726	-9.86466	-9.56354
1.25	-14.11437	-5.74689	-10.35571	-9.92853
1.26	-12.75821	-6.16561	-10.8579	-10.29156
1.27	-11.59998	-6.6275	-11.36132	-10.64432
1.28	-10.6027	-7.13698	-11.85231	-10.97692
1.29	-9.73688	-7.69884	-12.31312	-11.27821
1.3	-8.97962	-8.31798	-12.72229	-11.5364
1.31	-8.31304	-8.99914	-13.05635	-11.74012
1.32	-7.72305	-9.74613	-13.29301	-11.87974
1.33	-7.19837	-10.56038	-13.41556	-11.94882
1.34	-6.72988	-11.43816	-13.41694	-11.94511
1.35	-6.31008	-12.36544	-13.30157	-11.87093
1.36	-5.93274	-13.3092	-13.08408	-11.73272
1.37	-5.59263	-14.20534	-12.78552	-11.53993
1.38	-5.28534	-14.94961	-12.42895	-11.3036
1.39	-5.00709	-15.4106	-12.03591	-11.03505
1.4	-4.75465	-15.48462	-11.62446	-10.74489
1.41	-4.52523	-15.16367	-11.20862	-10.44236
1.42	-4.31641	-14.5413	-10.79858	-10.13515
1.43	-4.12607	-13.7486	-10.40141	-9.82937
1.44	-3.95236	-12.89439	-10.0217	-9.52967
1.45	-3.79366	-12.04726	-9.66227	-9.23949
1.46	-3.64854	-11.24314	-9.32464	-8.96125
1.47	-3.51574	-10.49759	-9.00943	-8.69658
1.48	-3.39414	-9.81501	-8.71667	-8.44647
1.49	-3.28273	-9.19419	-8.44597	-8.21139
1.5	-3.18064	-8.63133	-8.19668	-7.99147
1.51	-3.08708	-8.12164	-7.96796	-7.78649
1.52	-3.00133	-7.66011	-7.75886	-7.59599
1.53	-2.92277	-7.24189	-7.56836	-7.4193
1.54	-2.85082	-6.86246	-7.39535	-7.25559
1.55	-2.78497	-6.5177	-7.2387	-7.10383
1.56	-2.72476	-6.20386	-7.09718	-6.96288
1.57	-2.66979	-5.91757	-6.96954	-6.83145
1.58	-2.61966	-5.65576	-6.85443	-6.70816
1.59	-2.57406	-5.41571	-6.75043	-6.59155
1.6	-2.53266	-5.19492	-6.65603	-6.48011
1.61	-2.4952	-4.99116	-6.56967	-6.37233
1.62	-2.46142	-4.80238	-6.48971	-6.26677
1.63	-2.43111	-4.62674	-6.41447	-6.16209
1.64	-2.40406	-4.46258	-6.3423	-6.05715
1.65	-2.38009	-4.3084	-6.27157	-5.95099
1.66	-2.35904	-4.16285	-6.2008	-5.84296
1.67	-2.34078	-4.02476	-6.12864	-5.73268
1.68	-2.32517	-3.89307	-6.05402	-5.62006
1.69	-2.31213	-3.76692	-5.97614	-5.50528
1.7	-2.30156	-3.64558	-5.8945	-5.38876
1.71	-2.29341	-3.52846	-5.80897	-5.2711
1.72	-2.28762	-3.41514	-5.71973	-5.15304
1.73	-2.28419	-3.30536	-5.62723	-5.03538
1.74	-2.2831	-3.19895	-5.5322	-4.91895
1.75	-2.28441	-3.09589	-5.43553	-4.80457
1.76	-2.28816	-2.99627	-5.33824	-4.69299
1.77	-2.29447	-2.90025	-5.24142	-4.5849
1.78	-2.30347	-2.80806	-5.14615	-4.48091
1.79	-2.31537	-2.71998	-5.05348	-4.38152
1.8	-2.33042	-2.63628	-4.96441	-4.28717
1.81	-2.34894	-2.55727	-4.87985	-4.1982
1.82	-2.37137	-2.48322	-4.80062	-4.1149
1.83	-2.39822	-2.4144	-4.72744	-4.03751
1.84	-2.43017	-2.35101	-4.66097	-3.96618
1.85	-2.46803	-2.29326	-4.6018	-3.90109
1.86	-2.51283	-2.24129	-4.55044	-3.84235
1.87	-2.56585	-2.19523	-4.50738	-3.79007
1.88	-2.62864	-2.15519	-4.47309	-3.74437
1.89	-2.70314	-2.12124	-4.44801	-3.70535
1.9	-2.79174	-2.09347	-4.43261	-3.67313
1.91	-2.89736	-2.07196	-4.42735	-3.64787
1.92	-3.02355	-2.05681	-4.43274	-3.62971
1.93	-3.17462	-2.04815	-4.44934	-3.61884
1.94	-3.35571	-2.04615	-4.47773	-3.61549
1.95	-3.57287	-2.05103	-4.51859	-3.6199
1.96	-3.83304	-2.06308	-4.57266	-3.63237
1.97	-4.14389	-2.08269	-4.64074	-3.65322
1.98	-4.51341	-2.11033	-4.72376	-3.68283
1.99	-4.94909	-2.14662	-4.8227	-3.72163
2	-5.45654	-2.19232	-4.93868	-3.77008
2.01	-6.03715	-2.24836	-5.0759	-3.8212
2.02	-6.68477	-2.31593	-5.23297	-3.88496
2.03	-7.38117	-2.39644	-5.41202	-3.96226
2.04	-8.09104	-2.49165	-5.61546	-4.05411
2.05	-8.75916	-2.60369	-5.84602	-4.16166
2.06	-9.3148	-2.73519	-6.10678	-4.28619
2.07	-9.68868	-2.88932	-6.40125	-4.42918
2.08	-9.8394	-3.06995	-6.73338	-4.59226
2.09	-9.77173	-3.28179	-7.10769	-4.77729
2.1	-9.53073	-3.53056	-7.52931	-4.98636
2.11	-9.17795	-3.82318	-8.00412	-5.22183
2.12	-8.7694	-4.16799	-8.53884	-5.48636
2.13	-8.34573	-4.57504	-9.14121	-5.78294
2.14	-7.93224	-5.0563	-9.82017	-6.11494
2.15	-7.54267	-5.62594	-10.58602	-6.48618
2.16	-7.18333	-6.3005	-11.45052	-6.90095
2.17	-6.85613	-7.09895	-12.42673	-7.36417
2.18	-6.56067	-8.0421	-13.52805	-7.88143
2.19	-6.29545	-9.15083	-14.76501	-8.45919
2.2	-6.0586	-10.44032	-16.1364	-9.10494
2.21	-5.84828	-11.90399	-17.60656	-9.82751
2.22	-5.66285	-13.4715	-19.05556	-10.63746
2.23	-5.50105	-14.92231	-20.21085	-11.54758
2.24	-5.36196	-15.82309	-20.69014	-12.57359
2.25	-5.24508	-15.78828	-20.32614	-13.73497
2.26	-5.15027	-14.95164	-19.373	-15.05568
2.27	-5.07781	-13.77592	-18.20478	-16.5637
2.28	-5.02829	-12.58986	-17.05223	-18.28551
2.29	-5.00271	-11.52405	-16.00804	-20.22206
2.3	-5.00235	-10.60761	-15.09597	-22.2645
2.31	-5.02887	-9.83269	-14.31309	-23.9843
2.32	-5.08419	-9.18114	-13.64814	-24.56694
2.33	-5.17056	-8.63407	-13.08861	-23.74095
2.34	-5.29051	-8.17471	-12.6232	-22.23775
2.35	-5.44686	-7.78912	-12.24262	-20.69694
2.36	-5.6427	-7.46606	-11.93977	-19.33878
2.37	-5.88139	-7.19684	-11.70978	-18.19441
2.38	-6.16664	-6.97512	-11.55009	-17.24292
2.39	-6.50247	-6.79696	-11.46069	-16.45501
2.4	-6.89334	-6.66117	-11.44449	-15.80429
2.41	-7.34425	-6.56993	-11.50803	-15.26922
2.42	-7.86091	-6.52995	-11.66224	-14.83271
2.43	-8.45001	-6.5537	-11.92303	-14.48122
2.44	-9.11955	-6.66006	-12.31039	-14.20399
2.45	-9.87936	-6.87199	-12.84254	-13.99239
2.46	-10.7418	-7.2075	-13.51785	-13.8394
2.47	-11.72268	-7.66258	-14.27551	-13.73923
2.48	-12.84238	-8.19565	-14.94993	-13.68699
2.49	-14.12706	-8.73403	-15.31034	-13.6785
2.5	-15.60857	-9.20845	-15.2563	-13.70998
2.51	-17.31848	-9.58686	-14.92648	-13.77793
2.52	-19.258	-9.87781	-14.53424	-13.87892
2.53	-21.28347	-10.11062	-14.21113	-14.00944
2.54	-22.82004	-10.31622	-14.00086	-14.16572
2.55	-22.90346	-10.51847	-13.90255	-14.34366
2.56	-21.52975	-10.73326	-13.90047	-14.53873
2.57	-19.6606	-10.97028	-13.97674	-14.74617
2.58	-17.87112	-11.23509	-14.11526	-14.96137
2.59	-16.304	-11.53057	-14.30215	-15.18084
2.6	-14.95636	-11.85777	-14.52508	-15.40413
2.61	-13.79483	-12.21614	-14.77214	-15.63711
2.62	-12.78582	-12.60359	-15.03091	-15.89773
2.63	-11.9016	-13.016	-15.28744	-16.22542
2.64	-11.12036	-13.44664	-15.52565	-16.69604
2.65	-10.42513	-13.88533	-15.72715	-17.44475
2.66	-9.80262	-14.31752	-15.87199	-18.69986
2.67	-9.24235	-14.72373	-15.94045	-20.84285
2.68	-8.73594	-15.07987	-15.91608	-24.60881
2.69	-8.27665	-15.35919	-15.78894	-32.30193
2.7	-7.85903	-15.5364	-15.55818	-35.73341
2.71	-7.47859	-15.59325	-15.23248	-26.61043
2.72	-7.13163	-15.52363	-14.82814	-22.48925
2.73	-6.81513	-15.33551	-14.36577	-19.98747
2.74	-6.52657	-15.04864	-13.86672	-18.24614
2.75	-6.26388	-14.68927	-13.35046	-16.93122
2.76	-6.02536	-14.28457	-12.83307	-15.88167
2.77	-5.80964	-13.85875	-12.32677	-15.00975
2.78	-5.61562	-13.43119	-11.84018	-14.26366
2.79	-5.44247	-13.0163	-11.37884	-13.61085
2.8	-5.28958	-12.6241	-10.94583	-13.02985
2.81	-5.15656	-12.26119	-10.54242	-12.5059
2.82	-5.04323	-11.93164	-10.16857	-12.02845
2.83	-4.94958	-11.63772	-9.82343	-11.5898
2.84	-4.87583	-11.38053	-9.50563	-11.18411
2.85	-4.82238	-11.16039	-9.21354	-10.80691
2.86	-4.78982	-10.97714	-8.94551	-10.45473
2.87	-4.77895	-10.83042	-8.6999	-10.1248
2.88	-4.79076	-10.71977	-8.47527	-9.81497
2.89	-4.82646	-10.64478	-8.27034	-9.52351
2.9	-4.88743	-10.60515	-8.08406	-9.24908
2.91	-4.97525	-10.60082	-7.91563	-8.99062
2.92	-5.09169	-10.63195	-7.76449	-8.74734
2.93	-5.2386	-10.69902	-7.6303	-8.51865
2.94	-5.41791	-10.8029	-7.51298	-8.30412
2.95	-5.63147	-10.94485	-7.41269	-8.10347
2.96	-5.8809	-11.12665	-7.32981	-7.91651
2.97	-6.1673	-11.35065	-7.26494	-7.74318
2.98	-6.49088	-11.61987	-7.21895	-7.58345
2.99	-6.85035	-11.93815	-7.1929	-7.43735
3	-7.24215	-12.31029	-7.18807	-7.30495
3.01	-7.6594	-12.74226	-7.20592	-7.18633
3.02	-8.09061	-13.24149	-7.24808	-7.0816
3.03	-8.51839	-13.81714	-7.31624	-6.99088
3.04	-8.91871	-14.4805	-7.41208	-6.91427
3.05	-9.26156	-15.24535	-7.53708	-6.85189
3.06	-9.51427	-16.12796	-7.69231	-6.80386
3.07	-9.64784	-17.14633	-7.87809	-6.77031
3.08	-9.64465	-18.31617	-8.09354	-6.75138
3.09	-9.50404	-19.63824	-8.33605	-6.74722
3.1	-9.24224	-21.06174	-8.6006	-6.75799
3.11	-8.88679	-22.39872	-8.87911	-6.78388
3.12	-8.46881	-23.22423	-9.15989	-6.82509
3.13	-8.01687	-23.06787	-9.42752	-6.88184
3.14	-7.55378	-21.97889	-9.66356	-6.95439
3.15	-7.09596	-20.45734	-9.84833	-7.04298
3.16	-6.65425	-18.89638	-9.96379	-7.14782
3.17	-6.23513	-17.45917	-9.99695	-7.26909
3.18	-5.84196	-16.18713	-9.94256	-7.4069
3.19	-5.47603	-15.07732	-9.80395	-7.56117
3.2	-5.13725	-14.11402	-9.59162	-7.7316
3.21	-4.82469	-13.27959	-9.32039	-7.91751
3.22	-4.53696	-12.55765	-9.00625	-8.11768
3.23	-4.27241	-11.93375	-8.664	-8.33015
3.24	-4.02933	-11.39521	-8.30597	-8.55192
3.25	-3.80599	-10.93084	-7.94169	-8.77867
3.26	-3.60073	-10.53057	-7.57821	-9.00435
3.27	-3.41201	-10.18523	-7.22063	-9.22092
3.28	-3.23837	-9.88636	-6.87272	-9.41816
3.29	-3.07848	-9.62605	-6.53741	-9.58382
3.3	-2.93113	-9.39691	-6.21711	-9.70428
3.31	-2.7952	-9.19199	-5.91386	-9.76589
3.32	-2.66971	-9.00484	-5.62937	-9.75685
3.33	-2.55373	-8.82952	-5.36492	-9.66945
3.34	-2.44647	-8.66068	-5.12125	-9.50171
3.35	-2.34717	-8.49363	-4.89851	-9.25811
3.36	-2.25517	-8.32441	-4.69623	-8.94879
3.37	-2.16988	-8.14988	-4.51344	-8.58778
3.38	-2.09075	-7.96776	-4.34874	-8.19071
3.39	-2.01728	-7.77663	-4.2005	-7.77282
3.4	-1.94904	-7.57585	-4.06697	-7.34762
3.41	-1.88562	-7.36557	-3.94641	-6.92617
3.42	-1.82665	-7.14652	-3.83719	-6.51696
3.43	-1.77181	-6.91996	-3.7378	-6.12605
3.44	-1.7208	-6.68747	-3.64692	-5.75746
3.45	-1.67333	-6.45085	-3.5634	-5.41354
3.46	-1.62916	-6.21198	-3.48626	-5.09536
3.47	-1.58806	-5.97273	-3.41464	-4.80302
3.48	-1.54982	-5.73486	-3.34786	-4.53592
3.49	-1.51425	-5.49998	-3.28532	-4.29303
3.5	-1.48116	-5.2695	-3.22653	-4.07298
