# Supplementary material for: A Triple-Band Broadband Miniature Antenna Design for Implantable Continuous Glucose Monitoring
Source: Hindawi journal article supplement (doi:10.1155/2023/8123177), 2023-10-13
Supplement: f1 [file 8123177.f1.zip › Figure3(b) (1).txt]

Freq [GHz]	dB(S(1,1)) []	dB(S(1,1)) []	dB(S(1,1)) []	dB(S(1,1)) []
0.5	-2.07565	-2.08806	-2.07526	-2.08343
0.51	-2.02326	-2.0357	-2.02331	-2.0312
0.52	-1.97484	-1.98744	-1.97531	-1.98291
0.53	-1.93034	-1.94326	-1.93125	-1.93854
0.54	-1.88978	-1.90317	-1.89115	-1.89813
0.55	-1.85319	-1.86719	-1.85506	-1.8617
0.56	-1.82062	-1.8354	-1.82306	-1.82932
0.57	-1.79216	-1.80789	-1.79525	-1.80111
0.58	-1.76795	-1.7848	-1.77177	-1.77721
0.59	-1.74816	-1.76633	-1.75283	-1.75779
0.6	-1.73302	-1.75271	-1.73867	-1.74311
0.61	-1.7228	-1.74425	-1.72959	-1.73344
0.62	-1.71787	-1.74133	-1.72596	-1.72918
0.63	-1.71865	-1.7444	-1.72825	-1.73075
0.64	-1.72569	-1.75404	-1.73701	-1.73873
0.65	-1.73963	-1.77094	-1.75293	-1.75377
0.66	-1.76127	-1.79596	-1.77684	-1.77672
0.67	-1.79159	-1.83013	-1.80976	-1.80857
0.68	-1.83179	-1.87473	-1.85293	-1.85057
0.69	-1.88335	-1.9313	-1.90788	-1.90423
0.7	-1.94809	-2.00177	-1.97648	-1.97144
0.71	-2.02827	-2.08851	-2.06105	-2.0545
0.72	-2.12671	-2.19447	-2.16448	-2.15632
0.73	-2.24692	-2.32332	-2.29036	-2.28051
0.74	-2.39335	-2.47966	-2.4432	-2.4316
0.75	-2.57159	-2.66927	-2.62867	-2.61533
0.76	-2.78877	-2.89948	-2.85398	-2.83898
0.77	-3.05398	-3.17962	-3.12826	-3.11183
0.78	-3.37888	-3.52159	-3.46325	-3.44578
0.79	-3.77851	-3.94069	-3.874	-3.85617
0.8	-4.27231	-4.45675	-4.38002	-4.36288
0.81	-4.88558	-5.09564	-5.00678	-4.99185
0.82	-5.65148	-5.89169	-5.78797	-5.77738
0.83	-6.61394	-6.89139	-6.769	-6.76558
0.84	-7.83213	-8.16016	-8.01311	-8.02029
0.85	-9.3873	-9.79524	-9.61263	-9.63364
0.86	-11.39074	-11.95292	-11.71102	-11.74538
0.87	-13.97083	-14.90637	-14.54135	-14.56748
0.88	-17.05454	-19.09884	-18.39557	-18.27023
0.89	-19.12939	-23.49532	-22.07057	-21.25512
0.9	-17.72297	-20.84964	-20.08196	-19.19599
0.91	-14.97955	-16.5977	-16.27239	-15.73882
0.92	-12.65977	-13.65219	-13.45442	-13.10801
0.93	-10.895	-11.58633	-11.43698	-11.19354
0.94	-9.55659	-10.07331	-9.94786	-9.76936
0.95	-8.53044	-8.93056	-8.8196	-8.68643
0.96	-7.73585	-8.04995	-7.9492	-7.84994
0.97	-7.11677	-7.36278	-7.26998	-7.19738
0.98	-6.63367	-6.82297	-6.73677	-6.68587
0.99	-6.25808	-6.39833	-6.31781	-6.28511
1	-5.96918	-6.06573	-5.99019	-5.97313
1.01	-5.75153	-5.80815	-5.73705	-5.73373
1.02	-5.59357	-5.61289	-5.54578	-5.55478
1.03	-5.48655	-5.47037	-5.40689	-5.42716
1.04	-5.4239	-5.37331	-5.31313	-5.34393
1.05	-5.40064	-5.31613	-5.25904	-5.29985
1.06	-5.41302	-5.29461	-5.24041	-5.29091
1.07	-5.4583	-5.30552	-5.25412	-5.31416
1.08	-5.53451	-5.34646	-5.29783	-5.36739
1.09	-5.64032	-5.41565	-5.36984	-5.44905
1.1	-5.77488	-5.51185	-5.469	-5.55811
1.11	-5.93782	-5.63422	-5.59459	-5.69396
1.12	-6.12911	-5.78228	-5.74623	-5.85632
1.13	-6.34903	-5.95582	-5.92386	-6.04526
1.14	-6.59812	-6.15485	-6.12765	-6.26104
1.15	-6.87716	-6.37957	-6.35799	-6.50417
1.16	-7.18709	-6.63031	-6.61541	-6.7753
1.17	-7.529	-6.90747	-6.90057	-7.07519
1.18	-7.90405	-7.21146	-7.21418	-7.40469
1.19	-8.31335	-7.54264	-7.55694	-7.7646
1.2	-8.7579	-7.90122	-7.92947	-8.15563
1.21	-9.23835	-8.28711	-8.33215	-8.57822
1.22	-9.7547	-8.69977	-8.76496	-9.03239
1.23	-10.30587	-9.13793	-9.22723	-9.51737
1.24	-10.88904	-9.59928	-9.71728	-10.03123
1.25	-11.49863	-10.08005	-10.23195	-10.57029
1.26	-12.125	-10.57442	-10.76589	-11.12829
1.27	-12.75266	-11.07386	-11.31078	-11.69535
1.28	-13.35853	-11.56651	-11.85431	-12.25686
1.29	-13.91083	-12.03663	-12.37931	-12.79242
1.3	-14.37038	-12.4647	-12.86338	-13.27567
1.31	-14.69596	-12.82846	-13.27977	-13.67588
1.32	-14.85428	-13.10545	-13.60024	-13.96219
1.33	-14.83085	-13.2768	-13.80012	-14.11026
1.34	-14.6355	-13.33146	-13.86435	-14.10916
1.35	-14.29839	-13.26895	-13.7918	-13.96482
1.36	-13.85961	-13.09949	-13.59554	-13.69801
1.37	-13.3587	-12.84124	-13.29891	-13.33801
1.38	-12.8284	-12.51617	-12.92946	-12.91559
1.39	-12.29282	-12.14614	-12.51378	-12.45803
1.4	-11.76818	-11.75044	-12.07435	-11.98692
1.41	-11.26463	-11.34454	-11.62845	-11.51792
1.42	-10.78796	-10.94013	-11.1885	-11.06169
1.43	-10.34108	-10.5455	-10.76286	-10.62498
1.44	-9.92497	-10.16624	-10.35682	-10.21177
1.45	-9.53948	-9.80589	-9.97345	-9.8241
1.46	-9.18373	-9.46648	-9.61428	-9.46269
1.47	-8.85646	-9.14894	-9.27981	-9.12742
1.48	-8.55617	-8.85349	-8.96985	-8.81763
1.49	-8.28129	-8.57976	-8.68374	-8.53231
1.5	-8.0302	-8.32704	-8.42056	-8.27025
1.51	-7.80128	-8.09433	-8.1792	-8.03011
1.52	-7.59296	-7.88045	-7.95846	-7.81046
1.53	-7.40368	-7.68408	-7.75706	-7.60983
1.54	-7.23188	-7.50376	-7.57365	-7.42672
1.55	-7.07604	-7.33795	-7.40687	-7.25956
1.56	-6.93462	-7.18508	-7.25531	-7.10678
1.57	-6.80608	-7.04348	-7.11752	-6.96676
1.58	-6.68886	-6.91151	-6.99199	-6.83782
1.59	-6.58137	-6.78753	-6.87719	-6.71828
1.6	-6.48201	-6.66994	-6.77151	-6.60644
1.61	-6.38919	-6.55727	-6.67333	-6.50062
1.62	-6.3013	-6.44814	-6.58103	-6.39919
1.63	-6.21682	-6.34137	-6.49299	-6.30062
1.64	-6.13429	-6.23598	-6.40763	-6.20352
1.65	-6.05242	-6.13119	-6.32352	-6.1067
1.66	-5.97005	-6.0265	-6.23936	-6.00921
1.67	-5.88629	-5.9216	-6.15405	-5.91037
1.68	-5.80049	-5.81643	-6.06676	-5.80981
1.69	-5.71229	-5.71111	-5.97694	-5.70742
1.7	-5.62159	-5.60591	-5.88434	-5.60339
1.71	-5.52861	-5.50123	-5.78899	-5.49813
1.72	-5.43376	-5.39757	-5.69123	-5.39226
1.73	-5.33771	-5.29547	-5.59161	-5.28651
1.74	-5.24125	-5.19549	-5.49087	-5.18172
1.75	-5.14528	-5.09821	-5.38988	-5.07875
1.76	-5.05075	-5.00415	-5.2896	-4.97845
1.77	-4.95861	-4.91384	-5.19099	-4.88164
1.78	-4.86981	-4.82776	-5.09502	-4.78909
1.79	-4.78522	-4.74634	-5.00261	-4.70149
1.8	-4.70564	-4.67	-4.9146	-4.61943
1.81	-4.6318	-4.59909	-4.83175	-4.54347
1.82	-4.56436	-4.53397	-4.75477	-4.47407
1.83	-4.5039	-4.47495	-4.68427	-4.41166
1.84	-4.45093	-4.42236	-4.62079	-4.35662
1.85	-4.40594	-4.3765	-4.56482	-4.30929
1.86	-4.36935	-4.3377	-4.51682	-4.27
1.87	-4.34159	-4.30629	-4.47721	-4.23908
1.88	-4.32306	-4.28263	-4.4464	-4.21687
1.89	-4.3142	-4.26711	-4.4248	-4.20371
1.9	-4.31545	-4.26016	-4.41284	-4.19999
1.91	-4.32729	-4.26227	-4.41098	-4.20613
1.92	-4.35027	-4.27398	-4.41971	-4.22261
1.93	-4.385	-4.29591	-4.43958	-4.24994
1.94	-4.43215	-4.32875	-4.4712	-4.28872
1.95	-4.49253	-4.37328	-4.51525	-4.33961
1.96	-4.56701	-4.43038	-4.57251	-4.40335
1.97	-4.65663	-4.50108	-4.64382	-4.48078
1.98	-4.76254	-4.58648	-4.73014	-4.57282
1.99	-4.88608	-4.68787	-4.83255	-4.68051
2	-5.02875	-4.80668	-4.95223	-4.80496
2.01	-5.1923	-4.94451	-5.0803	-4.93445
2.02	-5.37867	-5.10318	-5.23283	-5.0852
2.03	-5.5901	-5.2847	-5.4116	-5.25948
2.04	-5.82912	-5.49132	-5.6185	-5.45984
2.05	-6.09861	-5.72556	-5.85562	-5.68911
2.06	-6.40186	-5.99024	-6.12535	-5.95047
2.07	-6.74258	-6.28848	-6.43044	-6.2475
2.08	-7.12505	-6.62374	-6.77413	-6.58421
2.09	-7.55412	-6.99989	-7.16027	-6.96513
2.1	-8.03539	-7.42122	-7.59348	-7.3954
2.11	-8.57528	-7.89246	-8.07928	-7.88092
2.12	-9.1812	-8.41886	-8.62432	-8.42846
2.13	-9.86171	-9.00615	-9.23655	-9.04594
2.14	-10.62659	-9.66051	-9.9255	-9.74266
2.15	-11.48685	-10.38841	-10.70256	-10.52971
2.16	-12.45425	-11.19605	-11.58117	-11.42036
2.17	-13.53957	-12.08834	-12.57685	-12.43054
2.18	-14.74797	-13.06643	-13.70636	-13.57891
2.19	-16.06692	-14.12263	-14.98463	-14.8857
2.2	-17.43821	-15.23047	-16.41503	-16.36715
2.21	-18.70582	-16.32758	-17.9625	-18.01666
2.22	-19.57413	-17.29474	-19.48997	-19.74902
2.23	-19.7255	-17.9562	-20.66591	-21.27637
2.24	-19.12699	-18.14819	-21.03341	-22.03494
2.25	-18.06937	-17.83841	-20.46137	-21.63822
2.26	-16.86602	-17.15431	-19.32285	-20.43038
2.27	-15.69397	-16.27833	-18.03909	-18.98492
2.28	-14.62257	-15.35137	-16.82678	-17.6082
2.29	-13.66882	-14.45305	-15.75716	-16.39389
2.3	-12.82903	-13.61959	-14.83993	-15.35122
2.31	-12.09282	-12.86344	-14.06444	-14.46464
2.32	-11.44869	-12.18572	-13.41535	-13.71428
2.33	-10.88602	-11.58273	-12.87807	-13.08206
2.34	-10.39574	-11.04921	-12.44038	-12.55308
2.35	-9.97044	-10.57985	-12.09277	-12.11563
2.36	-9.60442	-10.17005	-11.8285	-11.76084
2.37	-9.29366	-9.81625	-11.64353	-11.48232
2.38	-9.03595	-9.51615	-11.53668	-11.27599
2.39	-8.83114	-9.26899	-11.5099	-11.14001
2.4	-8.68166	-9.0757	-11.56887	-11.07489
2.41	-8.59329	-8.93932	-11.72382	-11.08384
2.42	-8.57626	-8.86523	-11.99053	-11.17326
2.43	-8.64634	-8.86121	-12.39091	-11.35333
2.44	-8.82487	-8.93655	-12.95105	-11.63824
2.45	-9.13434	-9.09849	-13.69123	-12.0445
2.46	-9.58312	-9.34309	-14.5939	-12.58346
2.47	-10.13326	-9.63781	-15.53134	-13.24001
2.48	-10.66855	-9.90294	-16.19306	-13.93069
2.49	-11.02647	-10.02362	-16.24044	-14.47252
2.5	-11.11987	-9.92245	-15.70969	-14.67178
2.51	-11.00516	-9.62944	-14.96695	-14.52683
2.52	-10.80321	-9.24955	-14.30174	-14.23396
2.53	-10.60666	-8.87879	-13.81651	-13.98254
2.54	-10.46034	-8.56792	-13.51116	-13.85758
2.55	-10.37827	-8.33204	-13.35264	-13.87068
2.56	-10.36047	-8.16893	-13.30403	-14.00458
2.57	-10.40217	-8.0707	-13.33281	-14.2357
2.58	-10.49775	-8.02909	-13.41175	-14.54143
2.59	-10.64207	-8.0373	-13.51776	-14.90087
2.6	-10.83071	-8.09032	-13.63078	-15.29339
2.61	-11.0598	-8.18479	-13.73303	-15.6968
2.62	-11.32563	-8.31867	-13.80902	-16.08592
2.63	-11.62423	-8.49102	-13.84597	-16.43203
2.64	-11.95082	-8.70173	-13.83447	-16.70426
2.65	-12.29916	-8.95135	-13.76917	-16.8732
2.66	-12.66088	-9.24091	-13.64898	-16.91642
2.67	-13.0247	-9.57174	-13.47682	-16.82388
2.68	-13.37588	-9.94528	-13.25875	-16.60039
2.69	-13.69596	-10.36282	-13.00288	-16.26367
2.7	-13.9635	-10.82499	-12.71819	-15.83904
2.71	-14.15604	-11.33124	-12.41355	-15.35355
2.72	-14.2535	-11.87878	-12.09707	-14.83163
2.73	-14.24228	-12.46128	-11.77571	-14.29303
2.74	-14.11864	-13.06705	-11.45516	-13.75245
2.75	-13.88959	-13.6767	-11.13989	-13.22014
2.76	-13.57102	-14.26079	-10.83327	-12.70287
2.77	-13.18388	-14.77849	-10.53774	-12.20479
2.78	-12.75012	-15.17992	-10.255	-11.72828
2.79	-12.28977	-15.41503	-9.98616	-11.27444
2.8	-11.81936	-15.44893	-9.73188	-10.84361
2.81	-11.35158	-15.27595	-9.49247	-10.43559
2.82	-10.89561	-14.92226	-9.26802	-10.04994
2.83	-10.45775	-14.43464	-9.05844	-9.68604
2.84	-10.04203	-13.86427	-8.86353	-9.34326
2.85	-9.6509	-13.25511	-8.68301	-9.02098
2.86	-9.28562	-12.63954	-8.51659	-8.71867
2.87	-8.94666	-12.03889	-8.36396	-8.4359
2.88	-8.63396	-11.46599	-8.22482	-8.17236
2.89	-8.34713	-10.92774	-8.0989	-7.92787
2.9	-8.08561	-10.42723	-7.98598	-7.7024
2.91	-7.84875	-9.96518	-7.88586	-7.49599
2.92	-7.63586	-9.54096	-7.79845	-7.30883
2.93	-7.44632	-9.1532	-7.72366	-7.14114
2.94	-7.27958	-8.80019	-7.66152	-6.99318
2.95	-7.1352	-8.48011	-7.61211	-6.86521
2.96	-7.01285	-8.19119	-7.57559	-6.75744
2.97	-6.91237	-7.93181	-7.55219	-6.67
2.98	-6.83377	-7.70051	-7.54225	-6.60292
2.99	-6.77721	-7.4961	-7.54615	-6.55613
3	-6.74305	-7.31761	-7.56438	-6.52945
3.01	-6.73187	-7.16434	-7.59748	-6.52267
3.02	-6.74441	-7.03585	-7.64605	-6.53555
3.03	-6.78167	-6.93199	-7.71071	-6.56794
3.04	-6.84479	-6.85289	-7.79209	-6.61978
3.05	-6.93514	-6.799	-7.89072	-6.69124
3.06	-7.05419	-6.77104	-8.00701	-6.78272
3.07	-7.2035	-6.77006	-8.14106	-6.89486
3.08	-7.38454	-6.79741	-8.29252	-7.02859
3.09	-7.59853	-6.85468	-8.46037	-7.18499
3.1	-7.84611	-6.94374	-8.64253	-7.36519
3.11	-8.12689	-7.06655	-8.83556	-7.57013
3.12	-8.43871	-7.22509	-9.03412	-7.80012
3.13	-8.77679	-7.42105	-9.23059	-8.05427
3.14	-9.13243	-7.65551	-9.41471	-8.32955
3.15	-9.49173	-7.92829	-9.57361	-8.6196
3.16	-9.83439	-8.23723	-9.69249	-8.91323
3.17	-10.13366	-8.57702	-9.75612	-9.19299
3.18	-10.35837	-8.93797	-9.75121	-9.43456
3.19	-10.47807	-9.30456	-9.66907	-9.6082
3.2	-10.47063	-9.65466	-9.50781	-9.68355
3.21	-10.32921	-9.96006	-9.27299	-9.63755
3.22	-10.06464	-10.18949	-8.97647	-9.4625
3.23	-9.70168	-10.31468	-8.63399	-9.16952
3.24	-9.27147	-10.31781	-8.26234	-8.78502
3.25	-8.80436	-10.19696	-7.87709	-8.34237
3.26	-8.32547	-9.96639	-7.49121	-7.87371
3.27	-7.85328	-9.65128	-7.11461	-7.40487
3.28	-7.40003	-9.28053	-6.7542	-6.95391
3.29	-6.97297	-8.88069	-6.41433	-6.53179
3.3	-6.57574	-8.47286	-6.09737	-6.14397
3.31	-6.20952	-8.07203	-5.80416	-5.79212
3.32	-5.87387	-7.68783	-5.53452	-5.47548
3.33	-5.56744	-7.32578	-5.28757	-5.19193
3.34	-5.28832	-6.98845	-5.06199	-4.93863
3.35	-5.03438	-6.67651	-4.85627	-4.71254
3.36	-4.80343	-6.38939	-4.66878	-4.5106
3.37	-4.59334	-6.12585	-4.4979	-4.32998
3.38	-4.40207	-5.88427	-4.34208	-4.16806
3.39	-4.22775	-5.66289	-4.19983	-4.02252
3.4	-4.06868	-5.45992	-4.0698	-3.89132
3.41	-3.92329	-5.27367	-3.95075	-3.77265
3.42	-3.7902	-5.10252	-3.84155	-3.66498
3.43	-3.66816	-4.945	-3.74118	-3.56695
3.44	-3.55606	-4.79977	-3.64875	-3.4774
3.45	-3.45291	-4.66562	-3.56343	-3.39533
3.46	-3.35783	-4.54145	-3.48452	-3.31988
3.47	-3.27002	-4.4263	-3.41137	-3.2503
3.48	-3.18881	-4.31931	-3.34341	-3.18595
3.49	-3.11356	-4.21969	-3.28013	-3.12626
3.5	-3.04373	-4.12676	-3.22108	-3.07074
