# Supplementary material for: A Triple-Band Broadband Miniature Antenna Design for Implantable Continuous Glucose Monitoring
Source: Hindawi journal article supplement (doi:10.1155/2023/8123177), 2023-10-13
Supplement: f1 [file 8123177.f1.zip › Figure3(c) (1).txt]

Freq [GHz]	dB(S(1,1))	dB(S(1,1))	dB(S(1,1))	dB(S(1,1))
0.5	-1.98554	-1.99099	-2.09912	-2.12548
0.51	-1.93095	-1.93532	-2.04733	-2.06774
0.52	-1.87951	-1.88288	-1.99956	-2.01392
0.53	-1.83111	-1.83359	-1.95581	-1.96398
0.54	-1.78567	-1.78738	-1.91611	-1.91793
0.55	-1.74312	-1.74419	-1.88051	-1.87577
0.56	-1.70341	-1.70399	-1.84908	-1.83756
0.57	-1.6665	-1.66675	-1.82195	-1.80337
0.58	-1.63239	-1.63246	-1.79928	-1.77332
0.59	-1.60111	-1.60114	-1.78127	-1.74755
0.6	-1.57272	-1.57283	-1.76818	-1.72627
0.61	-1.5473	-1.54757	-1.76033	-1.70971
0.62	-1.52498	-1.52545	-1.7581	-1.6982
0.63	-1.50594	-1.50658	-1.76199	-1.69211
0.64	-1.49037	-1.4911	-1.77259	-1.69193
0.65	-1.47852	-1.47921	-1.7906	-1.69823
0.66	-1.47066	-1.47112	-1.8169	-1.71174
0.67	-1.46712	-1.46712	-1.85256	-1.73332
0.68	-1.46827	-1.46757	-1.89887	-1.76405
0.69	-1.47452	-1.47289	-1.95744	-1.80524
0.7	-1.4864	-1.48361	-2.03022	-1.85852
0.71	-1.50454	-1.50037	-2.11964	-1.92589
0.72	-1.5297	-1.52396	-2.22872	-2.00985
0.73	-1.56284	-1.55535	-2.3612	-2.11351
0.74	-1.60516	-1.59574	-2.52178	-2.24076
0.75	-1.65815	-1.64662	-2.71639	-2.39651
0.76	-1.72366	-1.70984	-2.95251	-2.58696
0.77	-1.80403	-1.78773	-3.23966	-2.81998
0.78	-1.90221	-1.88323	-3.59001	-3.10564
0.79	-2.02193	-2.00005	-4.0192	-3.45677
0.8	-2.16795	-2.14296	-4.54747	-3.88988
0.81	-2.34634	-2.31805	-5.20129	-4.42624
0.82	-2.56494	-2.53325	-6.01573	-5.09335
0.83	-2.83392	-2.79883	-7.03837	-5.92702
0.84	-3.1665	-3.12825	-8.33625	-6.97425
0.85	-3.58002	-3.53922	-10.00912	-8.29729
0.86	-4.09731	-4.0551	-12.21688	-9.9781
0.87	-4.74868	-4.70687	-15.23339	-12.11374
0.88	-5.57471	-5.53583	-19.43828	-14.73788
0.89	-6.6306	-6.59729	-23.17155	-17.3302
0.9	-7.99297	-7.96572	-20.1901	-17.86297
0.91	-9.77097	-9.73972	-16.21599	-15.85129
0.92	-12.11775	-12.0311	-13.42486	-13.44848
0.93	-15.17731	-14.82396	-11.44479	-11.46951
0.94	-18.385	-17.17075	-9.98533	-9.93161
0.95	-18.4912	-16.69969	-8.87915	-8.73743
0.96	-15.57416	-14.26357	-8.02518	-7.80152
0.97	-12.82258	-11.93462	-7.35842	-7.06105
0.98	-10.75005	-10.11766	-6.83491	-6.47079
0.99	-9.20435	-8.73594	-6.42376	-5.99794
1	-8.03308	-7.67939	-6.10267	-5.61835
1.01	-7.13135	-6.86361	-5.85521	-5.314
1.02	-6.42853	-6.22855	-5.66908	-5.0713
1.03	-5.87602	-5.73153	-5.53499	-4.87987
1.04	-5.43956	-5.34191	-5.44588	-4.73174
1.05	-5.09442	-5.03733	-5.39635	-4.62073
1.06	-4.82252	-4.80134	-5.3823	-4.54205
1.07	-4.61041	-4.62167	-5.40062	-4.49201
1.08	-4.44799	-4.48912	-5.44899	-4.46771
1.09	-4.32766	-4.39676	-5.52574	-4.46697
1.1	-4.24363	-4.33938	-5.62966	-4.48812
1.11	-4.19154	-4.31304	-5.76001	-4.52995
1.12	-4.16811	-4.31485	-5.91635	-4.5916
1.13	-4.1709	-4.3427	-6.09852	-4.67255
1.14	-4.19814	-4.39513	-6.3066	-4.77254
1.15	-4.24864	-4.47122	-6.54083	-4.89155
1.16	-4.32167	-4.57049	-6.80157	-5.02978
1.17	-4.41685	-4.69286	-7.08924	-5.18765
1.18	-4.5342	-4.83856	-7.40429	-5.36575
1.19	-4.674	-5.00818	-7.74704	-5.56489
1.2	-4.83684	-5.20256	-8.11765	-5.78605
1.21	-5.02354	-5.42287	-8.51593	-6.03042
1.22	-5.2352	-5.67052	-8.94111	-6.2994
1.23	-5.47316	-5.94721	-9.39162	-6.59459
1.24	-5.73902	-6.25495	-9.86466	-6.91788
1.25	-6.03462	-6.59602	-10.35571	-7.27138
1.26	-6.36207	-6.97304	-10.8579	-7.65753
1.27	-6.72376	-7.38895	-11.36132	-8.07914
1.28	-7.12236	-7.84701	-11.85231	-8.53938
1.29	-7.56081	-8.35083	-12.31312	-9.04191
1.3	-8.04235	-8.90428	-12.72229	-9.59095
1.31	-8.57044	-9.51145	-13.05635	-10.19131
1.32	-9.14871	-10.17633	-13.29301	-10.84855
1.33	-9.78072	-10.90243	-13.41556	-11.56899
1.34	-10.46958	-11.69171	-13.41694	-12.35971
1.35	-11.21723	-12.54288	-13.30157	-13.22836
1.36	-12.02301	-13.44797	-13.08408	-14.18246
1.37	-12.88114	-14.38655	-12.78552	-15.22763
1.38	-13.77639	-15.31678	-12.42895	-16.36343
1.39	-14.67729	-16.16507	-12.03591	-17.57413
1.4	-15.52762	-16.82386	-11.62446	-18.80996
1.41	-16.24127	-17.17596	-11.20862	-19.95668
1.42	-16.71318	-17.15163	-10.79858	-20.81311
1.43	-16.85797	-16.77522	-10.40141	-21.1473
1.44	-16.65863	-16.14764	-10.0217	-20.86692
1.45	-16.17776	-15.38607	-9.66227	-20.11118
1.46	-15.51835	-14.58143	-9.32464	-19.11673
1.47	-14.77654	-13.78981	-9.00943	-18.06534
1.48	-14.0201	-13.04054	-8.71667	-17.05337
1.49	-13.28905	-12.34646	-8.44597	-16.12026
1.5	-12.60382	-11.71122	-8.19668	-15.27669
1.51	-11.97294	-11.13379	-7.96796	-14.52075
1.52	-11.39828	-10.61086	-7.75886	-13.8457
1.53	-10.87818	-10.13821	-7.56836	-13.24338
1.54	-10.40915	-9.71132	-7.39535	-12.70566
1.55	-9.98681	-9.32572	-7.2387	-12.22493
1.56	-9.60639	-8.9771	-7.09718	-11.79425
1.57	-9.26292	-8.66138	-6.96954	-11.40732
1.58	-8.95141	-8.37466	-6.85443	-11.05836
1.59	-8.66688	-8.1133	-6.75043	-10.74205
1.6	-8.40451	-7.87379	-6.65603	-10.45345
1.61	-8.15971	-7.6528	-6.56967	-10.1879
1.62	-7.92827	-7.4472	-6.48971	-9.94103
1.63	-7.70648	-7.254	-6.41447	-9.70872
1.64	-7.49128	-7.07049	-6.3423	-9.48718
1.65	-7.28032	-6.89417	-6.27157	-9.27291
1.66	-7.07203	-6.72289	-6.2008	-9.06287
1.67	-6.86554	-6.55487	-6.12864	-8.85448
1.68	-6.66065	-6.38871	-6.05402	-8.64567
1.69	-6.45765	-6.22347	-5.97614	-8.43501
1.7	-6.25718	-6.05862	-5.8945	-8.22162
1.71	-6.06009	-5.89404	-5.80897	-8.00523
1.72	-5.86731	-5.72994	-5.71973	-7.78607
1.73	-5.67974	-5.56685	-5.62723	-7.56481
1.74	-5.49817	-5.40544	-5.5322	-7.34245
1.75	-5.32326	-5.24655	-5.43553	-7.1202
1.76	-5.15553	-5.09103	-5.33824	-6.89937
1.77	-4.99533	-4.9397	-5.24142	-6.68127
1.78	-4.84288	-4.79335	-5.14615	-6.46714
1.79	-4.69828	-4.65263	-5.05348	-6.2581
1.8	-4.56155	-4.51809	-4.96441	-6.05507
1.81	-4.43261	-4.39015	-4.87985	-5.85882
1.82	-4.31134	-4.26913	-4.80062	-5.66992
1.83	-4.19757	-4.15523	-4.72744	-5.48876
1.84	-4.09114	-4.04856	-4.66097	-5.31558
1.85	-3.99184	-3.94914	-4.6018	-5.15047
1.86	-3.89948	-3.85697	-4.55044	-4.99342
1.87	-3.81387	-3.77197	-4.50738	-4.8443
1.88	-3.73485	-3.69406	-4.47309	-4.70293
1.89	-3.66225	-3.62312	-4.44801	-4.56906
1.9	-3.59596	-3.55904	-4.43261	-4.44241
1.91	-3.53586	-3.50171	-4.42735	-4.32267
1.92	-3.48189	-3.45104	-4.43274	-4.2095
1.93	-3.43399	-3.40696	-4.44934	-4.10259
1.94	-3.39217	-3.36941	-4.47773	-4.00161
1.95	-3.35646	-3.33839	-4.51859	-3.90625
1.96	-3.32691	-3.31391	-4.57266	-3.8162
1.97	-3.30365	-3.29604	-4.64074	-3.7312
1.98	-3.28682	-3.28489	-4.72376	-3.65098
1.99	-3.27664	-3.28062	-4.8227	-3.57532
2	-3.27337	-3.28347	-4.93868	-3.50401
2.01	-3.27733	-3.29371	-5.0759	-3.43689
2.02	-3.2889	-3.31171	-5.23297	-3.37381
2.03	-3.30854	-3.3379	-5.41202	-3.31466
2.04	-3.33679	-3.37282	-5.61546	-3.25938
2.05	-3.37428	-3.4171	-5.84602	-3.20793
2.06	-3.42173	-3.47147	-6.10678	-3.1603
2.07	-3.47999	-3.53681	-6.40125	-3.11652
2.08	-3.55002	-3.61413	-6.73338	-3.07666
2.09	-3.63293	-3.70461	-7.10769	-3.04082
2.1	-3.73	-3.80959	-7.52931	-3.0091
2.11	-3.84267	-3.93064	-8.00412	-2.98164
2.12	-3.9726	-4.06955	-8.53884	-2.95856
2.13	-4.12168	-4.22838	-9.14121	-2.93995
2.14	-4.29205	-4.40947	-9.82017	-2.92585
2.15	-4.48616	-4.61548	-10.58602	-2.91624
2.16	-4.70678	-4.84947	-11.45052	-2.91094
2.17	-4.95703	-5.11488	-12.42673	-2.90964
2.18	-5.24049	-5.41561	-13.52805	-2.9118
2.19	-5.56116	-5.75609	-14.76501	-2.91671
2.2	-5.92361	-6.14131	-16.1364	-2.92339
2.21	-6.33298	-6.57689	-17.60656	-2.9307
2.22	-6.79513	-7.06923	-19.05556	-2.93737
2.23	-7.31667	-7.62554	-20.21085	-2.94207
2.24	-7.90521	-8.25409	-20.69014	-2.94355
2.25	-8.56942	-8.96434	-20.32614	-2.94074
2.26	-9.31933	-9.7672	-19.373	-2.93282
2.27	-10.16655	-10.67534	-18.20478	-2.91929
2.28	-11.12451	-11.70336	-17.05223	-2.90001
2.29	-12.20847	-12.86748	-16.00804	-2.87512
2.3	-13.43469	-14.18389	-15.09597	-2.84501
2.31	-14.81725	-15.66251	-14.31309	-2.81028
2.32	-16.35786	-17.28851	-13.64814	-2.77161
2.33	-18.01753	-18.97325	-13.08861	-2.72971
2.34	-19.64943	-20.4577	-12.6232	-2.68532
2.35	-20.90488	-21.27203	-12.24262	-2.63908
2.36	-21.32121	-21.0831	-11.93977	-2.59162
2.37	-20.79631	-20.13058	-11.70978	-2.54345
2.38	-19.72816	-18.89859	-11.55009	-2.49502
2.39	-18.53405	-17.68734	-11.46069	-2.44671
2.4	-17.42017	-16.60739	-11.44449	-2.39883
2.41	-16.45158	-15.68142	-11.50803	-2.35165
2.42	-15.63536	-14.90176	-11.66224	-2.30537
2.43	-14.95992	-14.253	-11.92303	-2.26016
2.44	-14.4096	-13.71966	-12.31039	-2.21616
2.45	-13.96959	-13.2884	-12.84254	-2.1735
2.46	-13.62727	-12.94846	-13.51785	-2.13227
2.47	-13.37232	-12.69149	-14.27551	-2.09255
2.48	-13.19653	-12.5112	-14.94993	-2.0544
2.49	-13.09345	-12.40305	-15.31034	-2.0179
2.5	-13.05817	-12.364	-15.2563	-1.98308
2.51	-13.08702	-12.39227	-14.92648	-1.94999
2.52	-13.17744	-12.48717	-14.53424	-1.91866
2.53	-13.32781	-12.64898	-14.21113	-1.88912
2.54	-13.53737	-12.8788	-14.00086	-1.8614
2.55	-13.8061	-13.17851	-13.90255	-1.8355
2.56	-14.13468	-13.55067	-13.90047	-1.81143
2.57	-14.52443	-13.99836	-13.97674	-1.7892
2.58	-14.97717	-14.52506	-14.11526	-1.76878
2.59	-15.49511	-15.13432	-14.30215	-1.75017
2.6	-16.08045	-15.82904	-14.52508	-1.73334
2.61	-16.73481	-16.61018	-14.77214	-1.71826
2.62	-17.45802	-17.47407	-15.03091	-1.70489
2.63	-18.24584	-18.40723	-15.28744	-1.69317
2.64	-19.08587	-19.3771	-15.52565	-1.68306
2.65	-19.95057	-20.31793	-15.72715	-1.67448
2.66	-20.78724	-21.11739	-15.87199	-1.66738
2.67	-21.50859	-21.62577	-15.94045	-1.66168
2.68	-21.99713	-21.71678	-15.91608	-1.65729
2.69	-22.14257	-21.37324	-15.78894	-1.65414
2.7	-21.90399	-20.69962	-15.55818	-1.65215
2.71	-21.33837	-19.84441	-15.23248	-1.65121
2.72	-20.56063	-18.9277	-14.82814	-1.65125
2.73	-19.68291	-18.02207	-14.36577	-1.65217
2.74	-18.78426	-17.16352	-13.86672	-1.65389
2.75	-17.91044	-16.36633	-13.35046	-1.6563
2.76	-17.08406	-15.63354	-12.83307	-1.65932
2.77	-16.3142	-14.96287	-12.32677	-1.66287
2.78	-15.60266	-14.34985	-11.84018	-1.66684
2.79	-14.94771	-13.78935	-11.37884	-1.67116
2.8	-14.34605	-13.27631	-10.94583	-1.67575
2.81	-13.79381	-12.80608	-10.54242	-1.68051
2.82	-13.28716	-12.37455	-10.16857	-1.68537
2.83	-12.8225	-11.97812	-9.82343	-1.69025
2.84	-12.39658	-11.61377	-9.50563	-1.69507
2.85	-12.00656	-11.27895	-9.21354	-1.69978
2.86	-11.65001	-10.97158	-8.94551	-1.70431
2.87	-11.3249	-10.69003	-8.6999	-1.7086
2.88	-11.02957	-10.43309	-8.47527	-1.71263
2.89	-10.76277	-10.19994	-8.27034	-1.71635
2.9	-10.52361	-9.99016	-8.08406	-1.71978
2.91	-10.31161	-9.80377	-7.91563	-1.72292
2.92	-10.12669	-9.6412	-7.76449	-1.72584
2.93	-9.9692	-9.50335	-7.6303	-1.72862
2.94	-9.83999	-9.39163	-7.51298	-1.73139
2.95	-9.74043	-9.30803	-7.41269	-1.73436
2.96	-9.6725	-9.25512	-7.32981	-1.73775
2.97	-9.6388	-9.23615	-7.26494	-1.74187
2.98	-9.64264	-9.25497	-7.21895	-1.74708
2.99	-9.68797	-9.31597	-7.1929	-1.75377
3	-9.7792	-9.42374	-7.18807	-1.76239
3.01	-9.92069	-9.58245	-7.20592	-1.7734
3.02	-10.11568	-9.79455	-7.24808	-1.78729
3.03	-10.36408	-10.05869	-7.31624	-1.8045
3.04	-10.65871	-10.36632	-7.41208	-1.82546
3.05	-10.97929	-10.69728	-7.53708	-1.85054
3.06	-11.28521	-11.01554	-7.69231	-1.88005
3.07	-11.51188	-11.26871	-7.87809	-1.91423
3.08	-11.58077	-11.39706	-8.09354	-1.95321
3.09	-11.43075	-11.35381	-8.33605	-1.99706
3.1	-11.05482	-11.12716	-8.6006	-2.04573
3.11	-10.50697	-10.74583	-8.87911	-2.09906
3.12	-9.87054	-10.26322	-9.15989	-2.15675
3.13	-9.2206	-9.73465	-9.42752	-2.21834
3.14	-8.60639	-9.20288	-9.66356	-2.28313
3.15	-8.05225	-8.69477	-9.84833	-2.35018
3.16	-7.56547	-8.22408	-9.96379	-2.4182
3.17	-7.14381	-7.79579	-9.99695	-2.48553
3.18	-6.78071	-7.40978	-9.94256	-2.55012
3.19	-6.46821	-7.06328	-9.80395	-2.6095
3.2	-6.19855	-6.75242	-9.59162	-2.66091
3.21	-5.96473	-6.47305	-9.32039	-2.70144
3.22	-5.76081	-6.22121	-9.00625	-2.72831
3.23	-5.58181	-5.9933	-8.664	-2.73916
3.24	-5.42367	-5.78616	-8.30597	-2.73245
3.25	-5.28308	-5.59705	-7.94169	-2.70769
3.26	-5.15734	-5.42363	-7.57821	-2.66559
3.27	-5.0443	-5.26391	-7.22063	-2.60801
3.28	-4.94221	-5.11619	-6.87272	-2.5377
3.29	-4.84967	-4.97903	-6.53741	-2.45795
3.3	-4.76555	-4.85122	-6.21711	-2.37219
3.31	-4.68897	-4.7317	-5.91386	-2.28364
3.32	-4.61924	-4.61959	-5.62937	-2.19508
3.33	-4.55586	-4.51413	-5.36492	-2.10872
3.34	-4.49846	-4.41465	-5.12125	-2.02619
3.35	-4.44685	-4.32058	-4.89851	-1.94855
3.36	-4.40095	-4.23143	-4.69623	-1.87643
3.37	-4.36077	-4.14678	-4.51344	-1.81009
3.38	-4.32635	-4.06623	-4.34874	-1.74952
3.39	-4.29751	-3.98947	-4.2005	-1.69452
3.4	-4.27316	-3.91619	-4.06697	-1.64478
3.41	-4.24947	-3.84614	-3.94641	-1.59994
3.42	-4.21525	-3.77908	-3.83719	-1.55959
3.43	-4.14268	-3.71482	-3.7378	-1.52331
3.44	-3.98532	-3.65315	-3.64692	-1.49071
3.45	-3.73618	-3.59393	-3.5634	-1.46142
3.46	-3.50432	-3.53699	-3.48626	-1.43508
3.47	-3.37945	-3.4822	-3.41464	-1.41138
3.48	-3.33507	-3.42943	-3.34786	-1.39004
3.49	-3.32366	-3.37858	-3.28532	-1.37078
3.5	-3.32084	-3.32954	-3.22653	-1.35339
