# Supplementary material for: A Triple-Band Broadband Miniature Antenna Design for Implantable Continuous Glucose Monitoring
Source: Hindawi journal article supplement (doi:10.1155/2023/8123177), 2023-10-13
Supplement: f1 [file 8123177.f1.zip › Figure3(d) (1).txt]

Freq [GHz]	dB(S(1,1))	dB(S(1,1))	dB(S(1,1))	dB(S(1,1)) []
0.5	-1.99731	-2.06655	-2.07089	-2.08343
0.51	-1.96161	-2.01518	-2.01862	-2.0312
0.52	-1.93023	-1.96761	-1.97039	-1.98291
0.53	-1.90323	-1.92385	-1.92619	-1.93854
0.54	-1.88068	-1.88393	-1.88601	-1.89813
0.55	-1.86271	-1.84791	-1.84987	-1.8617
0.56	-1.84946	-1.81587	-1.81784	-1.82932
0.57	-1.84113	-1.78793	-1.79002	-1.80111
0.58	-1.83798	-1.76423	-1.76652	-1.77721
0.59	-1.84031	-1.74499	-1.74754	-1.75779
0.6	-1.84849	-1.73044	-1.73329	-1.74311
0.61	-1.86299	-1.72089	-1.72408	-1.73344
0.62	-1.88435	-1.71671	-1.72027	-1.72918
0.63	-1.91324	-1.71835	-1.72229	-1.73075
0.64	-1.95046	-1.72636	-1.7307	-1.73873
0.65	-1.99697	-1.74142	-1.74617	-1.75377
0.66	-2.05397	-1.76433	-1.76952	-1.77672
0.67	-2.12287	-1.79608	-1.80176	-1.80857
0.68	-2.20545	-1.83789	-1.84412	-1.85057
0.69	-2.30384	-1.89123	-1.8981	-1.90423
0.7	-2.42073	-1.95793	-1.96558	-1.97144
0.71	-2.55943	-2.04022	-2.04886	-2.0545
0.72	-2.7241	-2.14088	-2.15081	-2.15632
0.73	-2.91998	-2.26339	-2.27502	-2.28051
0.74	-3.15373	-2.41208	-2.426	-2.4316
0.75	-3.43381	-2.59241	-2.60941	-2.61533
0.76	-3.77108	-2.81129	-2.83246	-2.83898
0.77	-4.1795	-3.07749	-3.10432	-3.11183
0.78	-4.67697	-3.40224	-3.43673	-3.44578
0.79	-5.28635	-3.79996	-3.8448	-3.85617
0.8	-6.03641	-4.28928	-4.34807	-4.36288
0.81	-6.96203	-4.89451	-4.97202	-4.99185
0.82	-8.10187	-5.64768	-5.75022	-5.77738
0.83	-9.48745	-6.59182	-6.72762	-6.76558
0.84	-11.10555	-7.78641	-7.96608	-8.02029
0.85	-12.79022	-9.31737	-9.55387	-9.63364
0.86	-14.03786	-11.31622	-11.62204	-11.74538
0.87	-14.17899	-13.99394	-14.36007	-14.56748
0.88	-13.26404	-17.63505	-17.88233	-18.27023
0.89	-11.97821	-21.55246	-20.69417	-21.25512
0.9	-10.78214	-20.5497	-18.94963	-19.19599
0.91	-9.81818	-16.74396	-15.66437	-15.73882
0.92	-9.09485	-13.79516	-13.07735	-13.10801
0.93	-8.58395	-11.68179	-11.17258	-11.19354
0.94	-8.25306	-10.12643	-9.74834	-9.76936
0.95	-8.07445	-8.95105	-8.66238	-8.68643
0.96	-8.02675	-8.04597	-7.82209	-7.84994
0.97	-8.09454	-7.3405	-7.16574	-7.19738
0.98	-8.26743	-6.78691	-6.65078	-6.68587
0.99	-8.53931	-6.3518	-6.24697	-6.28511
1	-8.90775	-6.0111	-5.93238	-5.97313
1.01	-9.37366	-5.74714	-5.69076	-5.73373
1.02	-9.94119	-5.54672	-5.51	-5.55478
1.03	-10.61792	-5.39988	-5.38092	-5.42716
1.04	-11.41522	-5.29907	-5.29659	-5.34393
1.05	-12.34894	-5.23853	-5.25172	-5.29985
1.06	-13.44002	-5.21388	-5.24232	-5.29091
1.07	-14.71439	-5.22178	-5.26542	-5.31416
1.08	-16.19897	-5.25978	-5.31883	-5.36739
1.09	-17.90301	-5.32606	-5.40101	-5.44905
1.1	-19.74978	-5.41935	-5.51093	-5.55811
1.11	-21.38699	-5.53885	-5.648	-5.69396
1.12	-22.02462	-5.6841	-5.812	-5.85632
1.13	-21.18932	-5.85497	-6.00301	-6.04526
1.14	-19.51065	-6.05155	-6.22135	-6.26104
1.15	-17.71375	-6.27419	-6.46758	-6.50417
1.16	-16.07887	-6.52338	-6.74242	-6.7753
1.17	-14.65541	-6.79973	-7.04673	-7.07519
1.18	-13.42569	-7.10393	-7.38145	-7.40469
1.19	-12.35969	-7.43669	-7.74753	-7.7646
1.2	-11.42952	-7.79865	-8.14584	-8.15563
1.21	-10.61216	-8.19026	-8.57702	-8.57822
1.22	-9.8892	-8.61164	-9.04132	-9.03239
1.23	-9.24596	-9.06236	-9.53828	-9.51737
1.24	-8.67068	-9.54111	-10.06631	-10.03123
1.25	-8.15387	-10.04528	-10.62209	-10.57029
1.26	-7.68774	-10.57039	-11.19968	-11.12829
1.27	-7.26588	-11.10929	-11.78947	-11.69535
1.28	-6.88295	-11.65128	-12.37676	-12.25686
1.29	-6.53443	-12.18122	-12.94053	-12.79242
1.3	-6.21652	-12.67892	-13.45297	-13.27567
1.31	-5.92598	-13.11951	-13.88083	-13.67588
1.32	-5.66	-13.47551	-14.18987	-13.96219
1.33	-5.41618	-13.72105	-14.35244	-14.11026
1.34	-5.19244	-13.83747	-14.35558	-14.10916
1.35	-4.98697	-13.81848	-14.20537	-13.96482
1.36	-4.79818	-13.67194	-13.92471	-13.69801
1.37	-4.62469	-13.41741	-13.54598	-13.33801
1.38	-4.46527	-13.08083	-13.10288	-12.91559
1.39	-4.31886	-12.68896	-12.62484	-12.45803
1.4	-4.18452	-12.2655	-12.13471	-11.98692
1.41	-4.0614	-11.8294	-11.64874	-11.51792
1.42	-3.94876	-11.39462	-11.17774	-11.06169
1.43	-3.84593	-10.97085	-10.72836	-10.62498
1.44	-3.75233	-10.56441	-10.30436	-10.21177
1.45	-3.66741	-10.17912	-9.90754	-9.8241
1.46	-3.59068	-9.81702	-9.53839	-9.46269
1.47	-3.52168	-9.47897	-9.19658	-9.12742
1.48	-3.45998	-9.165	-8.88127	-8.81763
1.49	-3.40517	-8.87459	-8.59132	-8.53231
1.5	-3.35685	-8.60691	-8.32544	-8.27025
1.51	-3.31461	-8.36088	-8.08222	-8.03011
1.52	-3.27805	-8.13531	-7.86023	-7.81046
1.53	-3.24674	-7.92893	-7.65801	-7.60983
1.54	-3.22025	-7.74041	-7.47412	-7.42672
1.55	-3.1981	-7.56836	-7.30711	-7.25956
1.56	-3.1798	-7.4114	-7.15549	-7.10678
1.57	-3.16486	-7.26808	-7.01782	-6.96676
1.58	-3.15274	-7.13694	-6.89258	-6.83782
1.59	-3.14292	-7.01648	-6.77828	-6.71828
1.6	-3.13486	-6.90516	-6.67336	-6.60644
1.61	-3.12805	-6.8014	-6.57628	-6.50062
1.62	-3.12205	-6.70364	-6.48548	-6.39919
1.63	-3.11643	-6.61031	-6.39942	-6.30062
1.64	-3.11088	-6.51988	-6.31662	-6.20352
1.65	-3.10516	-6.43091	-6.23568	-6.1067
1.66	-3.09915	-6.34211	-6.15533	-6.00921
1.67	-3.09285	-6.25237	-6.07448	-5.91037
1.68	-3.08638	-6.16081	-5.99224	-5.80981
1.69	-3.07998	-6.06684	-5.90799	-5.70742
1.7	-3.07398	-5.97017	-5.82136	-5.60339
1.71	-3.06886	-5.87082	-5.73227	-5.49813
1.72	-3.06516	-5.7691	-5.6409	-5.39226
1.73	-3.06349	-5.6656	-5.54767	-5.28651
1.74	-3.06456	-5.56109	-5.45321	-5.18172
1.75	-3.06911	-5.45653	-5.35831	-5.07875
1.76	-3.07795	-5.35293	-5.26387	-4.97845
1.77	-3.09193	-5.25134	-5.17085	-4.88164
1.78	-3.11197	-5.15278	-5.08024	-4.78909
1.79	-3.13903	-5.05821	-4.99301	-4.70149
1.8	-3.17414	-4.96846	-4.9101	-4.61943
1.81	-3.21843	-4.8843	-4.83237	-4.54347
1.82	-3.2731	-4.80634	-4.76064	-4.47407
1.83	-3.33951	-4.73509	-4.69565	-4.41166
1.84	-3.41912	-4.67097	-4.63807	-4.35662
1.85	-3.51358	-4.61432	-4.58852	-4.30929
1.86	-3.62476	-4.56539	-4.54758	-4.27
1.87	-3.75471	-4.5244	-4.51581	-4.23908
1.88	-3.9058	-4.49155	-4.49373	-4.21687
1.89	-4.08063	-4.46701	-4.4819	-4.20371
1.9	-4.28216	-4.451	-4.48087	-4.19999
1.91	-4.51365	-4.44373	-4.49124	-4.20613
1.92	-4.77868	-4.44548	-4.51366	-4.22261
1.93	-5.08108	-4.45657	-4.54886	-4.24994
1.94	-5.42485	-4.47743	-4.59765	-4.28872
1.95	-5.8139	-4.50857	-4.66096	-4.33961
1.96	-6.25168	-4.5506	-4.73983	-4.40335
1.97	-6.74049	-4.60428	-4.83548	-4.48078
1.98	-7.28034	-4.67049	-4.94929	-4.57282
1.99	-7.86719	-4.7503	-5.08283	-4.68051
2	-8.49017	-4.84493	-5.23794	-4.80496
2.01	-9.12789	-4.95577	-5.4167	-4.93445
2.02	-9.74438	-5.08444	-5.62151	-5.0852
2.03	-10.28697	-5.2327	-5.85514	-5.25948
2.04	-10.6911	-5.40252	-6.12076	-5.45984
2.05	-10.89652	-5.59601	-6.42204	-5.68911
2.06	-10.87132	-5.81541	-6.76321	-5.95047
2.07	-10.62767	-6.06302	-7.14916	-6.2475
2.08	-10.21513	-6.34115	-7.58562	-6.58421
2.09	-9.69794	-6.652	-8.07923	-6.96513
2.1	-9.13421	-6.99763	-8.63787	-7.3954
2.11	-8.56658	-7.3798	-9.27085	-7.88092
2.12	-8.02203	-7.7999	-9.98933	-8.42846
2.13	-7.5155	-8.25883	-10.80679	-9.04594
2.14	-7.05391	-8.75699	-11.73958	-9.74266
2.15	-6.63923	-9.29419	-12.80744	-10.52971
2.16	-6.27064	-9.86964	-14.03338	-11.42036
2.17	-5.94586	-10.48195	-15.44124	-12.43054
2.18	-5.66191	-11.12913	-17.04477	-13.57891
2.19	-5.41564	-11.80855	-18.81032	-14.8857
2.2	-5.20391	-12.51688	-20.55048	-16.36715
2.21	-5.02378	-13.24993	-21.75179	-18.01666
2.22	-4.87254	-14.00231	-21.76977	-19.74902
2.23	-4.74771	-14.76694	-20.6785	-21.27637
2.24	-4.64701	-15.53436	-19.15079	-22.03494
2.25	-4.56836	-16.29172	-17.64148	-21.63822
2.26	-4.5098	-17.02183	-16.30167	-20.43038
2.27	-4.46943	-17.70229	-15.15225	-18.98492
2.28	-4.44539	-18.30564	-14.17601	-17.6082
2.29	-4.43578	-18.80131	-13.34875	-16.39389
2.3	-4.43864	-19.16009	-12.64807	-15.35122
2.31	-4.45189	-19.36059	-12.05531	-14.46464
2.32	-4.47331	-19.39528	-11.55546	-13.71428
2.33	-4.5006	-19.2729	-11.13664	-13.08206
2.34	-4.53138	-19.0157	-10.78957	-12.55308
2.35	-4.5633	-18.65322	-10.50717	-12.11563
2.36	-4.59422	-18.21581	-10.28432	-11.76084
2.37	-4.62239	-17.73025	-10.11767	-11.48232
2.38	-4.64675	-17.21785	-10.00575	-11.27599
2.39	-4.66728	-16.6944	-9.94913	-11.14001
2.4	-4.6854	-16.17097	-9.9509	-11.07489
2.41	-4.70451	-15.65501	-10.01745	-11.08384
2.42	-4.73049	-15.15131	-10.15978	-11.17326
2.43	-4.77228	-14.66279	-10.39555	-11.35333
2.44	-4.84218	-14.19111	-10.75215	-11.63824
2.45	-4.95511	-13.73706	-11.27076	-12.0445
2.46	-5.12496	-13.3009	-12.00985	-12.58346
2.47	-5.35485	-12.88247	-13.03968	-13.24001
2.48	-5.61983	-12.48145	-14.39478	-13.93069
2.49	-5.85225	-12.09732	-15.88637	-14.47252
2.5	-5.95967	-11.72952	-16.7594	-14.67178
2.51	-5.88576	-11.37743	-16.2332	-14.52683
2.52	-5.65248	-11.04044	-14.86954	-14.23396
2.53	-5.33017	-10.71792	-13.54183	-13.98254
2.54	-4.98416	-10.40927	-12.53127	-13.85758
2.55	-4.65284	-10.1139	-11.822	-13.87068
2.56	-4.35205	-9.83124	-11.33842	-14.00458
2.57	-4.08515	-9.56077	-11.01264	-14.2357
2.58	-3.8501	-9.30197	-10.79475	-14.54143
2.59	-3.6431	-9.05436	-10.64997	-14.90087
2.6	-3.4602	-8.81748	-10.55415	-15.29339
2.61	-3.29789	-8.5909	-10.49032	-15.6968
2.62	-3.15318	-8.37421	-10.44625	-16.08592
2.63	-3.02365	-8.16703	-10.41295	-16.43203
2.64	-2.90731	-7.96899	-10.38365	-16.70426
2.65	-2.80254	-7.77976	-10.3532	-16.8732
2.66	-2.70803	-7.59901	-10.31765	-16.91642
2.67	-2.62268	-7.42644	-10.27398	-16.82388
2.68	-2.54562	-7.26177	-10.21997	-16.60039
2.69	-2.47609	-7.10474	-10.15407	-16.26367
2.7	-2.41347	-6.9551	-10.0753	-15.83904
2.71	-2.35726	-6.81262	-9.98318	-15.35355
2.72	-2.30701	-6.6771	-9.87766	-14.83163
2.73	-2.26237	-6.54833	-9.75906	-14.29303
2.74	-2.22303	-6.42613	-9.628	-13.75245
2.75	-2.18875	-6.31035	-9.48532	-13.22014
2.76	-2.15934	-6.20084	-9.33205	-12.70287
2.77	-2.13462	-6.09746	-9.16934	-12.20479
2.78	-2.11448	-6.00011	-8.99838	-11.72828
2.79	-2.09882	-5.90868	-8.82041	-11.27444
2.8	-2.08758	-5.82311	-8.63669	-10.84361
2.81	-2.08073	-5.74331	-8.44842	-10.43559
2.82	-2.07825	-5.66926	-8.2568	-10.04994
2.83	-2.08016	-5.60091	-8.06298	-9.68604
2.84	-2.08648	-5.53828	-7.8681	-9.34326
2.85	-2.09725	-5.48136	-7.67328	-9.02098
2.86	-2.11253	-5.43021	-7.47965	-8.71867
2.87	-2.13238	-5.38486	-7.28838	-8.4359
2.88	-2.15686	-5.34542	-7.10074	-8.17236
2.89	-2.18602	-5.31198	-6.91808	-7.92787
2.9	-2.2199	-5.28467	-6.74195	-7.7024
2.91	-2.25852	-5.26367	-6.57407	-7.49599
2.92	-2.30186	-5.24915	-6.41642	-7.30883
2.93	-2.34982	-5.24135	-6.27122	-7.14114
2.94	-2.40226	-5.24051	-6.14093	-6.99318
2.95	-2.45894	-5.24691	-6.02821	-6.86521
2.96	-2.5195	-5.26087	-5.93577	-6.75744
2.97	-2.58342	-5.28271	-5.86615	-6.67
2.98	-2.65005	-5.3128	-5.82151	-6.60292
2.99	-2.71852	-5.35148	-5.80319	-6.55613
3	-2.78778	-5.39911	-5.81147	-6.52945
3.01	-2.85655	-5.45602	-5.84519	-6.52267
3.02	-2.92336	-5.52246	-5.90174	-6.53555
3.03	-2.98654	-5.59856	-5.97708	-6.56794
3.04	-3.04431	-5.68428	-6.06615	-6.61978
3.05	-3.09482	-5.7793	-6.1634	-6.69124
3.06	-3.13627	-5.8829	-6.26336	-6.78272
3.07	-3.16701	-5.99379	-6.36124	-6.89486
3.08	-3.18564	-6.10994	-6.4533	-7.02859
3.09	-3.19118	-6.22834	-6.53705	-7.18499
3.1	-3.18307	-6.34479	-6.6112	-7.36519
3.11	-3.16127	-6.45372	-6.67556	-7.57013
3.12	-3.12627	-6.54813	-6.73076	-7.80012
3.13	-3.07901	-6.61977	-6.778	-8.05427
3.14	-3.02079	-6.65967	-6.81881	-8.32955
3.15	-2.95322	-6.65911	-6.85483	-8.6196
3.16	-2.87805	-6.61087	-6.88769	-8.91323
3.17	-2.79706	-6.51061	-6.91887	-9.19299
3.18	-2.71199	-6.35801	-6.94962	-9.43456
3.19	-2.62446	-6.15704	-6.98091	-9.6082
3.2	-2.5359	-5.91553	-7.01339	-9.68355
3.21	-2.44755	-5.64388	-7.04733	-9.63755
3.22	-2.36044	-5.35349	-7.08262	-9.4625
3.23	-2.27537	-5.05535	-7.11871	-9.16952
3.24	-2.19299	-4.75897	-7.15458	-8.78502
3.25	-2.11375	-4.47185	-7.18876	-8.34237
3.26	-2.03798	-4.19936	-7.21931	-7.87371
3.27	-1.96588	-3.94493	-7.24388	-7.40487
3.28	-1.89755	-3.71037	-7.2598	-6.95391
3.29	-1.83301	-3.49623	-7.26425	-6.53179
3.3	-1.77225	-3.30219	-7.25442	-6.14397
3.31	-1.71517	-3.12731	-7.22779	-5.79212
3.32	-1.66168	-2.9703	-7.18236	-5.47548
3.33	-1.61163	-2.82971	-7.11692	-5.19193
3.34	-1.56488	-2.70399	-7.03118	-4.93863
3.35	-1.52128	-2.59164	-6.92583	-4.71254
3.36	-1.48066	-2.49123	-6.80251	-4.5106
3.37	-1.44288	-2.40142	-6.66363	-4.32998
3.38	-1.40777	-2.32102	-6.51212	-4.16806
3.39	-1.37519	-2.24892	-6.3512	-4.02252
3.4	-1.34499	-2.18415	-6.1841	-3.89132
3.41	-1.31703	-2.12585	-6.01388	-3.77265
3.42	-1.29119	-2.07324	-5.84326	-3.66498
3.43	-1.26733	-2.02567	-5.67455	-3.56695
3.44	-1.24535	-1.98253	-5.50961	-3.4774
3.45	-1.22514	-1.94332	-5.34987	-3.39533
3.46	-1.20659	-1.90756	-5.19637	-3.31988
3.47	-1.18961	-1.87486	-5.04979	-3.2503
3.48	-1.17412	-1.84486	-4.91054	-3.18595
3.49	-1.16003	-1.81726	-4.77881	-3.12626
3.5	-1.14726	-1.79179	-4.65459	-3.07074
