# Supplementary material for: A Triple-Band Broadband Miniature Antenna Design for Implantable Continuous Glucose Monitoring
Source: Hindawi journal article supplement (doi:10.1155/2023/8123177), 2023-10-13
Supplement: f1 [file 8123177.f1.zip › Figure5(a) (1).txt]

Theta [deg]	dB(GainTotal) [] - Freq='0.9GHz' Phi='0deg'	dB(GainTotal) [] - Freq='0.9GHz' Phi='90deg'
-180	-34.12841	-34.12841
-179	-34.1401	-34.12931
-178	-34.15058	-34.13281
-177	-34.15983	-34.13891
-176	-34.16787	-34.14763
-175	-34.17467	-34.15896
-174	-34.18023	-34.17291
-173	-34.18455	-34.18949
-172	-34.18764	-34.2087
-171	-34.18949	-34.23057
-170	-34.19011	-34.25509
-169	-34.18951	-34.28227
-168	-34.1877	-34.31214
-167	-34.18469	-34.3447
-166	-34.1805	-34.37997
-165	-34.17513	-34.41796
-164	-34.16861	-34.4587
-163	-34.16095	-34.5022
-162	-34.15219	-34.54848
-161	-34.14234	-34.59756
-160	-34.13143	-34.64947
-159	-34.11948	-34.70423
-158	-34.10653	-34.76187
-157	-34.09261	-34.82241
-156	-34.07774	-34.88589
-155	-34.06196	-34.95233
-154	-34.04531	-35.02178
-153	-34.02782	-35.09427
-152	-34.00953	-35.16984
-151	-33.99047	-35.24852
-150	-33.97069	-35.33037
-149	-33.95023	-35.41542
-148	-33.92913	-35.50373
-147	-33.90742	-35.59536
-146	-33.88515	-35.69034
-145	-33.86237	-35.78876
-144	-33.83911	-35.89066
-143	-33.81543	-35.99611
-142	-33.79135	-36.10519
-141	-33.76694	-36.21798
-140	-33.74223	-36.33454
-139	-33.71726	-36.45497
-138	-33.69209	-36.57936
-137	-33.66675	-36.70781
-136	-33.64129	-36.84042
-135	-33.61575	-36.97729
-134	-33.59018	-37.11856
-133	-33.56461	-37.26434
-132	-33.5391	-37.41477
-131	-33.51369	-37.56999
-130	-33.48841	-37.73016
-129	-33.4633	-37.89545
-128	-33.43842	-38.06604
-127	-33.41379	-38.24211
-126	-33.38947	-38.42387
-125	-33.36547	-38.61155
-124	-33.34186	-38.80538
-123	-33.31865	-39.00563
-122	-33.29589	-39.21257
-121	-33.27362	-39.42652
-120	-33.25186	-39.64779
-119	-33.23066	-39.87676
-118	-33.21004	-40.11382
-117	-33.19004	-40.35939
-116	-33.17069	-40.61394
-115	-33.15202	-40.878
-114	-33.13405	-41.15213
-113	-33.11683	-41.43696
-112	-33.10036	-41.73319
-111	-33.08469	-42.04158
-110	-33.06984	-42.36301
-109	-33.05582	-42.69843
-108	-33.04267	-43.04894
-107	-33.03041	-43.41575
-106	-33.01905	-43.80026
-105	-33.00863	-44.20404
-104	-32.99915	-44.62891
-103	-32.99064	-45.07696
-102	-32.98311	-45.55063
-101	-32.97658	-46.05274
-100	-32.97107	-46.58666
-99	-32.9666	-47.15635
-98	-32.96316	-47.7666
-97	-32.96079	-48.42319
-96	-32.95948	-49.13325
-95	-32.95925	-49.90562
-94	-32.96011	-50.75143
-93	-32.96207	-51.6849
-92	-32.96513	-52.72448
-91	-32.9693	-53.89424
-90	-32.97458	-55.22567
-89	-32.98099	-56.75846
-88	-32.98852	-58.53529
-87	-32.99718	-60.56791
-86	-33.00696	-62.69026
-85	-33.01787	-64.16461
-84	-33.0299	-63.84892
-83	-33.04306	-62.04563
-82	-33.05734	-59.91804
-81	-33.07274	-57.9714
-80	-33.08925	-56.28518
-79	-33.10686	-54.83007
-78	-33.12557	-53.56289
-77	-33.14537	-52.44646
-76	-33.16625	-51.45184
-75	-33.1882	-50.55695
-74	-33.21121	-49.74484
-73	-33.23526	-49.00237
-72	-33.26034	-48.31922
-71	-33.28643	-47.68717
-70	-33.31352	-47.09955
-69	-33.34159	-46.55093
-68	-33.37062	-46.03682
-67	-33.4006	-45.55345
-66	-33.43149	-45.09766
-65	-33.46327	-44.66675
-64	-33.49593	-44.25842
-63	-33.52944	-43.87067
-62	-33.56376	-43.50177
-61	-33.59888	-43.15021
-60	-33.63476	-42.81465
-59	-33.67138	-42.49394
-58	-33.7087	-42.18702
-57	-33.74668	-41.89297
-56	-33.7853	-41.61096
-55	-33.82452	-41.34025
-54	-33.8643	-41.08017
-53	-33.9046	-40.83012
-52	-33.94538	-40.58955
-51	-33.98661	-40.35796
-50	-34.02824	-40.13491
-49	-34.07023	-39.91996
-48	-34.11253	-39.71276
-47	-34.15509	-39.51295
-46	-34.19788	-39.32022
-45	-34.24084	-39.13427
-44	-34.28391	-38.95483
-43	-34.32707	-38.78166
-42	-34.37024	-38.61452
-41	-34.41338	-38.45321
-40	-34.45643	-38.29751
-39	-34.49934	-38.14727
-38	-34.54206	-38.00229
-37	-34.58453	-37.86242
-36	-34.62669	-37.72753
-35	-34.66849	-37.59746
-34	-34.70986	-37.4721
-33	-34.75075	-37.35132
-32	-34.79111	-37.23501
-31	-34.83086	-37.12307
-30	-34.86996	-37.01541
-29	-34.90835	-36.91192
-28	-34.94596	-36.81253
-27	-34.98274	-36.71716
-26	-35.01863	-36.62574
-25	-35.05358	-36.53819
-24	-35.08752	-36.45444
-23	-35.1204	-36.37445
-22	-35.15216	-36.29816
-21	-35.18276	-36.2255
-20	-35.21213	-36.15643
-19	-35.24023	-36.09091
-18	-35.26701	-36.0289
-17	-35.29241	-35.97034
-16	-35.3164	-35.91521
-15	-35.33892	-35.86348
-14	-35.35994	-35.8151
-13	-35.37941	-35.77006
-12	-35.3973	-35.72832
-11	-35.41357	-35.68986
-10	-35.42818	-35.65465
-9	-35.44111	-35.62269
-8	-35.45234	-35.59394
-7	-35.46182	-35.56839
-6	-35.46955	-35.54602
-5	-35.4755	-35.52683
-4	-35.47966	-35.51081
-3	-35.48201	-35.49793
-2	-35.48255	-35.4882
-1	-35.48127	-35.48161
0	-35.47816	-35.47816
1	-35.47323	-35.47784
2	-35.46647	-35.48064
3	-35.4579	-35.48658
4	-35.44752	-35.49565
5	-35.43535	-35.50786
6	-35.4214	-35.52321
7	-35.40569	-35.54172
8	-35.38824	-35.56338
9	-35.36908	-35.58821
10	-35.34823	-35.61622
11	-35.32572	-35.64742
12	-35.30159	-35.68184
13	-35.27586	-35.71948
14	-35.24858	-35.76037
15	-35.21979	-35.80454
16	-35.18952	-35.85199
17	-35.15781	-35.90277
18	-35.12472	-35.95689
19	-35.09029	-36.01439
20	-35.05457	-36.0753
21	-35.01761	-36.13965
22	-34.97945	-36.20749
23	-34.94015	-36.27885
24	-34.89977	-36.35377
25	-34.85835	-36.43231
26	-34.81595	-36.51452
27	-34.77262	-36.60043
28	-34.72843	-36.69013
29	-34.68342	-36.78365
30	-34.63765	-36.88107
31	-34.59119	-36.98245
32	-34.54407	-37.08788
33	-34.49637	-37.19741
34	-34.44814	-37.31115
35	-34.39943	-37.42917
36	-34.3503	-37.55157
37	-34.3008	-37.67844
38	-34.25099	-37.8099
39	-34.20092	-37.94606
40	-34.15065	-38.08702
41	-34.10022	-38.23293
42	-34.0497	-38.38392
43	-33.99913	-38.54013
44	-33.94856	-38.70171
45	-33.89804	-38.86883
46	-33.84762	-39.04167
47	-33.79735	-39.2204
48	-33.74727	-39.40522
49	-33.69743	-39.59635
50	-33.64788	-39.79401
51	-33.59866	-39.99843
52	-33.5498	-40.20987
53	-33.50136	-40.42861
54	-33.45338	-40.65492
55	-33.40588	-40.88911
56	-33.35891	-41.13151
57	-33.31252	-41.38246
58	-33.26672	-41.64232
59	-33.22157	-41.91147
60	-33.17708	-42.19031
61	-33.13331	-42.47925
62	-33.09026	-42.77872
63	-33.04799	-43.08917
64	-33.00651	-43.41101
65	-32.96586	-43.7447
66	-32.92606	-44.09063
67	-32.88714	-44.44917
68	-32.84913	-44.82061
69	-32.81204	-45.20513
70	-32.7759	-45.60274
71	-32.74074	-46.0132
72	-32.70657	-46.43595
73	-32.67342	-46.86991
74	-32.6413	-47.31337
75	-32.61024	-47.76371
76	-32.58025	-48.21714
77	-32.55134	-48.66837
78	-32.52353	-49.11025
79	-32.49684	-49.53349
80	-32.47128	-49.92653
81	-32.44687	-50.27573
82	-32.4236	-50.56614
83	-32.40151	-50.7829
84	-32.38058	-50.91325
85	-32.36084	-50.94869
86	-32.3423	-50.88666
87	-32.32495	-50.73107
88	-32.30881	-50.49151
89	-32.29387	-50.18137
90	-32.28016	-49.81567
91	-32.26766	-49.40917
92	-32.25639	-48.97509
93	-32.24634	-48.52449
94	-32.23752	-48.06619
95	-32.22993	-47.60688
96	-32.22356	-47.15151
97	-32.21841	-46.70357
98	-32.21449	-46.26545
99	-32.21179	-45.83871
100	-32.2103	-45.42428
101	-32.21002	-45.02265
102	-32.21095	-44.63399
103	-32.21308	-44.25823
104	-32.2164	-43.89516
105	-32.22091	-43.54447
106	-32.22658	-43.20575
107	-32.23343	-42.87861
108	-32.24142	-42.56259
109	-32.25056	-42.25726
110	-32.26083	-41.96216
111	-32.27222	-41.67686
112	-32.2847	-41.40096
113	-32.29828	-41.13404
114	-32.31292	-40.87573
115	-32.32862	-40.62566
116	-32.34535	-40.38349
117	-32.3631	-40.14889
118	-32.38185	-39.92156
119	-32.40157	-39.7012
120	-32.42224	-39.48755
121	-32.44385	-39.28036
122	-32.46637	-39.07937
123	-32.48977	-38.88437
124	-32.51403	-38.69514
125	-32.53911	-38.51148
126	-32.56501	-38.33321
127	-32.59168	-38.16016
128	-32.6191	-37.99215
129	-32.64723	-37.82903
130	-32.67605	-37.67066
131	-32.70553	-37.51689
132	-32.73562	-37.36761
133	-32.76631	-37.22268
134	-32.79754	-37.08199
135	-32.8293	-36.94544
136	-32.86153	-36.81293
137	-32.89422	-36.68436
138	-32.9273	-36.55963
139	-32.96076	-36.43867
140	-32.99454	-36.3214
141	-33.02862	-36.20773
142	-33.06294	-36.09761
143	-33.09747	-35.99096
144	-33.13216	-35.88772
145	-33.16698	-35.78783
146	-33.20187	-35.69124
147	-33.2368	-35.59789
148	-33.27173	-35.50773
149	-33.3066	-35.42072
150	-33.34138	-35.33682
151	-33.37601	-35.25598
152	-33.41046	-35.17816
153	-33.44469	-35.10334
154	-33.47863	-35.03146
155	-33.51226	-34.96251
156	-33.54552	-34.89645
157	-33.57837	-34.83326
158	-33.61076	-34.7729
159	-33.64266	-34.71535
160	-33.67402	-34.6606
161	-33.7048	-34.60862
162	-33.73494	-34.55938
163	-33.76443	-34.51288
164	-33.7932	-34.46909
165	-33.82122	-34.42799
166	-33.84846	-34.38959
167	-33.87487	-34.35385
168	-33.90042	-34.32077
169	-33.92508	-34.29034
170	-33.9488	-34.26255
171	-33.97156	-34.23739
172	-33.99332	-34.21485
173	-34.01406	-34.19493
174	-34.03374	-34.17762
175	-34.05235	-34.16292
176	-34.06985	-34.15082
177	-34.08623	-34.14132
178	-34.10146	-34.13442
179	-34.11553	-34.13011
180	-34.12841	-34.12841
