# Supplementary material for: A Triple-Band Broadband Miniature Antenna Design for Implantable Continuous Glucose Monitoring
Source: Hindawi journal article supplement (doi:10.1155/2023/8123177), 2023-10-13
Supplement: f1 [file 8123177.f1.zip › Figure5(b) (1).txt]

Theta [deg]	dB(GainTotal) [] - Freq='1.4GHz' Phi='0deg'	dB(GainTotal) [] - Freq='1.4GHz' Phi='90deg'
-180	-22.76976	-22.76976
-179	-22.79843	-22.76995
-178	-22.82634	-22.7727
-177	-22.85349	-22.77801
-176	-22.87985	-22.78589
-175	-22.90541	-22.79633
-174	-22.93017	-22.80935
-173	-22.95411	-22.82494
-172	-22.97723	-22.84311
-171	-22.99951	-22.86387
-170	-23.02096	-22.88722
-169	-23.04156	-22.91316
-168	-23.06133	-22.94171
-167	-23.08025	-22.97287
-166	-23.09832	-23.00666
-165	-23.11556	-23.04307
-164	-23.13197	-23.08212
-163	-23.14754	-23.12382
-162	-23.1623	-23.16817
-161	-23.17624	-23.21521
-160	-23.18938	-23.26492
-159	-23.20173	-23.31734
-158	-23.2133	-23.37246
-157	-23.22411	-23.43032
-156	-23.23418	-23.49092
-155	-23.24352	-23.55428
-154	-23.25215	-23.62042
-153	-23.26008	-23.68935
-152	-23.26736	-23.76111
-151	-23.27398	-23.8357
-150	-23.27998	-23.91316
-149	-23.28538	-23.9935
-148	-23.29021	-24.07675
-147	-23.29449	-24.16293
-146	-23.29824	-24.25207
-145	-23.30151	-24.34421
-144	-23.3043	-24.43935
-143	-23.30666	-24.53755
-142	-23.3086	-24.63883
-141	-23.31017	-24.74321
-140	-23.31139	-24.85074
-139	-23.31228	-24.96146
-138	-23.31289	-25.07538
-137	-23.31323	-25.19256
-136	-23.31335	-25.31303
-135	-23.31326	-25.43683
-134	-23.31301	-25.564
-133	-23.31262	-25.69458
-132	-23.31212	-25.82861
-131	-23.31155	-25.96613
-130	-23.31092	-26.10719
-129	-23.31028	-26.25182
-128	-23.30965	-26.40007
-127	-23.30906	-26.55196
-126	-23.30853	-26.70756
-125	-23.3081	-26.86688
-124	-23.3078	-27.02996
-123	-23.30764	-27.19683
-122	-23.30766	-27.36752
-121	-23.30789	-27.54204
-120	-23.30834	-27.72041
-119	-23.30903	-27.90264
-118	-23.31001	-28.0887
-117	-23.31128	-28.27859
-116	-23.31287	-28.47226
-115	-23.31479	-28.66967
-114	-23.31708	-28.87074
-113	-23.31975	-29.07537
-112	-23.32281	-29.28343
-111	-23.32629	-29.49475
-110	-23.33021	-29.70914
-109	-23.33456	-29.92632
-108	-23.33939	-30.146
-107	-23.34468	-30.36781
-106	-23.35047	-30.5913
-105	-23.35676	-30.81594
-104	-23.36356	-31.04112
-103	-23.37088	-31.26613
-102	-23.37873	-31.49012
-101	-23.38712	-31.71215
-100	-23.39605	-31.93112
-99	-23.40553	-32.14583
-98	-23.41557	-32.3549
-97	-23.42616	-32.55685
-96	-23.43731	-32.75006
-95	-23.44903	-32.9328
-94	-23.46131	-33.10327
-93	-23.47414	-33.25962
-92	-23.48754	-33.40001
-91	-23.50149	-33.52267
-90	-23.51599	-33.62595
-89	-23.53103	-33.7084
-88	-23.54662	-33.76882
-87	-23.56273	-33.80636
-86	-23.57936	-33.82051
-85	-23.59651	-33.81115
-84	-23.61415	-33.77858
-83	-23.63229	-33.72346
-82	-23.65089	-33.6468
-81	-23.66996	-33.54992
-80	-23.68946	-33.43436
-79	-23.7094	-33.30182
-78	-23.72974	-33.15411
-77	-23.75047	-32.99308
-76	-23.77156	-32.82055
-75	-23.793	-32.63829
-74	-23.81477	-32.44798
-73	-23.83683	-32.25117
-72	-23.85917	-32.0493
-71	-23.88176	-31.84365
-70	-23.90456	-31.63538
-69	-23.92756	-31.4255
-68	-23.95073	-31.21492
-67	-23.97402	-31.00441
-66	-23.99742	-30.79464
-65	-24.0209	-30.58618
-64	-24.0444	-30.37952
-63	-24.06792	-30.17505
-62	-24.0914	-29.97313
-61	-24.11482	-29.77404
-60	-24.13813	-29.57799
-59	-24.16131	-29.3852
-58	-24.18431	-29.19579
-57	-24.20709	-29.00989
-56	-24.22963	-28.82758
-55	-24.25187	-28.64894
-54	-24.27378	-28.47402
-53	-24.29533	-28.30283
-52	-24.31646	-28.1354
-51	-24.33714	-27.97173
-50	-24.35733	-27.81182
-49	-24.37699	-27.65566
-48	-24.39608	-27.50322
-47	-24.41455	-27.3545
-46	-24.43238	-27.20946
-45	-24.44952	-27.06807
-44	-24.46592	-26.93031
-43	-24.48156	-26.79613
-42	-24.49639	-26.66551
-41	-24.51037	-26.53842
-40	-24.52348	-26.41481
-39	-24.53566	-26.29466
-38	-24.54689	-26.17793
-37	-24.55714	-26.06459
-36	-24.56636	-25.95461
-35	-24.57453	-25.84795
-34	-24.58162	-25.7446
-33	-24.58759	-25.64451
-32	-24.59242	-25.54766
-31	-24.59609	-25.45403
-30	-24.59856	-25.3636
-29	-24.59981	-25.27633
-28	-24.59982	-25.1922
-27	-24.59857	-25.11121
-26	-24.59604	-25.03332
-25	-24.59222	-24.95852
-24	-24.58708	-24.88679
-23	-24.58062	-24.81811
-22	-24.57282	-24.75248
-21	-24.56368	-24.68988
-20	-24.55317	-24.63029
-19	-24.54131	-24.57372
-18	-24.52809	-24.52013
-17	-24.51349	-24.46954
-16	-24.49753	-24.42193
-15	-24.48021	-24.37729
-14	-24.46152	-24.33562
-13	-24.44147	-24.29692
-12	-24.42008	-24.26117
-11	-24.39734	-24.22839
-10	-24.37328	-24.19856
-9	-24.34789	-24.17168
-8	-24.32121	-24.14776
-7	-24.29324	-24.1268
-6	-24.264	-24.1088
-5	-24.23351	-24.09375
-4	-24.20179	-24.08167
-3	-24.16886	-24.07256
-2	-24.13476	-24.06643
-1	-24.09949	-24.06327
0	-24.06309	-24.06309
1	-24.02559	-24.06592
2	-23.98702	-24.07174
3	-23.9474	-24.08057
4	-23.90677	-24.09243
5	-23.86516	-24.10732
6	-23.8226	-24.12525
7	-23.77913	-24.14625
8	-23.73478	-24.17031
9	-23.68959	-24.19746
10	-23.64359	-24.22772
11	-23.59683	-24.2611
12	-23.54933	-24.29762
13	-23.50114	-24.3373
14	-23.45229	-24.38016
15	-23.40284	-24.42622
16	-23.3528	-24.47551
17	-23.30224	-24.52806
18	-23.25117	-24.58389
19	-23.19965	-24.64303
20	-23.14772	-24.70551
21	-23.09541	-24.77136
22	-23.04277	-24.84063
23	-22.98983	-24.91333
24	-22.93665	-24.98952
25	-22.88324	-25.06923
26	-22.82967	-25.15252
27	-22.77596	-25.23941
28	-22.72216	-25.32997
29	-22.6683	-25.42424
30	-22.61442	-25.52227
31	-22.56057	-25.62414
32	-22.50678	-25.72988
33	-22.45308	-25.83958
34	-22.39952	-25.9533
35	-22.34613	-26.0711
36	-22.29294	-26.19306
37	-22.24	-26.31927
38	-22.18733	-26.4498
39	-22.13497	-26.58475
40	-22.08296	-26.72421
41	-22.03132	-26.86826
42	-21.98009	-27.01703
43	-21.9293	-27.17061
44	-21.87898	-27.32911
45	-21.82916	-27.49266
46	-21.77986	-27.66137
47	-21.73113	-27.83538
48	-21.68298	-28.01483
49	-21.63544	-28.19984
50	-21.58854	-28.39056
51	-21.5423	-28.58715
52	-21.49675	-28.78975
53	-21.45191	-28.99852
54	-21.4078	-29.21361
55	-21.36445	-29.43519
56	-21.32188	-29.66341
57	-21.28011	-29.89841
58	-21.23916	-30.14034
59	-21.19904	-30.38934
60	-21.15978	-30.6455
61	-21.1214	-30.90892
62	-21.08391	-31.17965
63	-21.04733	-31.45769
64	-21.01167	-31.74299
65	-20.97695	-32.0354
66	-20.94318	-32.33469
67	-20.91038	-32.6405
68	-20.87855	-32.95229
69	-20.84772	-33.26932
70	-20.8179	-33.59062
71	-20.78908	-33.91488
72	-20.7613	-34.24043
73	-20.73454	-34.56516
74	-20.70883	-34.88645
75	-20.68417	-35.20109
76	-20.66057	-35.50525
77	-20.63803	-35.79449
78	-20.61657	-36.06374
79	-20.59619	-36.3075
80	-20.5769	-36.51996
81	-20.55869	-36.69542
82	-20.54158	-36.8286
83	-20.52556	-36.91514
84	-20.51065	-36.95202
85	-20.49684	-36.93787
86	-20.48413	-36.87314
87	-20.47254	-36.76006
88	-20.46205	-36.60234
89	-20.45267	-36.40486
90	-20.4444	-36.17315
91	-20.43725	-35.91299
92	-20.43119	-35.63007
93	-20.42625	-35.32968
94	-20.42241	-35.01657
95	-20.41968	-34.69487
96	-20.41804	-34.36808
97	-20.4175	-34.03909
98	-20.41805	-33.71026
99	-20.41969	-33.38346
100	-20.42242	-33.06014
101	-20.42622	-32.74144
102	-20.43109	-32.4282
103	-20.43703	-32.12103
104	-20.44403	-31.82037
105	-20.45208	-31.52652
106	-20.46117	-31.23963
107	-20.4713	-30.95981
108	-20.48245	-30.68705
109	-20.49462	-30.42133
110	-20.5078	-30.16257
111	-20.52198	-29.91065
112	-20.53714	-29.66545
113	-20.55327	-29.42682
114	-20.57037	-29.19461
115	-20.58841	-28.96866
116	-20.6074	-28.7488
117	-20.6273	-28.53486
118	-20.64812	-28.32669
119	-20.66982	-28.12413
120	-20.69241	-27.92701
121	-20.71586	-27.73519
122	-20.74016	-27.54851
123	-20.76529	-27.36683
124	-20.79123	-27.19002
125	-20.81797	-27.01794
126	-20.84548	-26.85048
127	-20.87375	-26.6875
128	-20.90275	-26.52889
129	-20.93247	-26.37455
130	-20.96289	-26.22437
131	-20.99398	-26.07824
132	-21.02573	-25.93609
133	-21.0581	-25.79781
134	-21.09108	-25.66333
135	-21.12464	-25.53256
136	-21.15877	-25.40542
137	-21.19342	-25.28185
138	-21.22858	-25.16178
139	-21.26422	-25.04514
140	-21.30032	-24.93188
141	-21.33685	-24.82193
142	-21.37377	-24.71524
143	-21.41107	-24.61176
144	-21.44871	-24.51145
145	-21.48666	-24.41425
146	-21.5249	-24.32012
147	-21.5634	-24.22903
148	-21.60211	-24.14094
149	-21.64102	-24.05581
150	-21.6801	-23.97361
151	-21.7193	-23.89431
152	-21.7586	-23.81787
153	-21.79797	-23.74428
154	-21.83738	-23.6735
155	-21.87678	-23.60551
156	-21.91616	-23.54029
157	-21.95547	-23.47783
158	-21.99469	-23.41809
159	-22.03377	-23.36106
160	-22.0727	-23.30673
161	-22.11143	-23.25508
162	-22.14994	-23.20609
163	-22.18819	-23.15976
164	-22.22614	-23.11607
165	-22.26378	-23.07501
166	-22.30106	-23.03656
167	-22.33796	-23.00073
168	-22.37444	-22.9675
169	-22.41048	-22.93687
170	-22.44604	-22.90882
171	-22.4811	-22.88336
172	-22.51563	-22.86047
173	-22.54961	-22.84016
174	-22.583	-22.82241
175	-22.61578	-22.80723
176	-22.64793	-22.79462
177	-22.67942	-22.78456
178	-22.71024	-22.77707
179	-22.74036	-22.77214
180	-22.76976	-22.76976
