# Supplementary material for: A Triple-Band Broadband Miniature Antenna Design for Implantable Continuous Glucose Monitoring
Source: Hindawi journal article supplement (doi:10.1155/2023/8123177), 2023-10-13
Supplement: f1 [file 8123177.f1.zip › Figure5(c) (1).txt]

Theta [deg]	dB(GainTotal) [] - Freq='2.45GHz' Phi='0deg'	dB(GainTotal) [] - Freq='2.45GHz' Phi='90deg'
-180	-31.50148	-31.50148
-179	-31.45939	-31.77416
-178	-31.41529	-32.0539
-177	-31.36902	-32.34094
-176	-31.3204	-32.63551
-175	-31.26923	-32.93781
-174	-31.21527	-33.24805
-173	-31.15826	-33.56641
-172	-31.09795	-33.89301
-171	-31.03407	-34.22794
-170	-30.96636	-34.57118
-169	-30.89458	-34.92263
-168	-30.8185	-35.28202
-167	-30.73794	-35.64891
-166	-30.65273	-36.02261
-165	-30.56276	-36.40209
-164	-30.46795	-36.78594
-163	-30.36827	-37.17222
-162	-30.26375	-37.55839
-161	-30.15446	-37.94115
-160	-30.04053	-38.31633
-159	-29.92213	-38.6788
-158	-29.79946	-39.02244
-157	-29.67279	-39.34018
-156	-29.54241	-39.62423
-155	-29.40864	-39.86646
-154	-29.27182	-40.05901
-153	-29.13232	-40.19502
-152	-28.99052	-40.26945
-151	-28.84679	-40.27968
-150	-28.70154	-40.22595
-149	-28.55514	-40.11125
-148	-28.40796	-39.94098
-147	-28.26039	-39.72221
-146	-28.11276	-39.46291
-145	-27.96542	-39.17121
-144	-27.81869	-38.85485
-143	-27.67286	-38.5208
-142	-27.52821	-38.17505
-141	-27.385	-37.82261
-140	-27.24347	-37.46755
-139	-27.10383	-37.11305
-138	-26.96626	-36.76159
-137	-26.83096	-36.41504
-136	-26.69806	-36.07475
-135	-26.56771	-35.74171
-134	-26.44001	-35.41657
-133	-26.31507	-35.09976
-132	-26.19297	-34.79149
-131	-26.07377	-34.49188
-130	-25.95754	-34.20089
-129	-25.8443	-33.91844
-128	-25.7341	-33.64437
-127	-25.62694	-33.37848
-126	-25.52284	-33.12055
-125	-25.4218	-32.87032
-124	-25.3238	-32.62755
-123	-25.22883	-32.39196
-122	-25.13686	-32.16329
-121	-25.04787	-31.94128
-120	-24.96182	-31.72564
-119	-24.87868	-31.51614
-118	-24.79839	-31.31251
-117	-24.72091	-31.1145
-116	-24.6462	-30.92189
-115	-24.57419	-30.73442
-114	-24.50484	-30.55189
-113	-24.4381	-30.37408
-112	-24.37389	-30.20078
-111	-24.31218	-30.03179
-110	-24.25289	-29.86692
-109	-24.19597	-29.70599
-108	-24.14137	-29.54883
-107	-24.08903	-29.39527
-106	-24.03888	-29.24516
-105	-23.99088	-29.09835
-104	-23.94498	-28.95468
-103	-23.90111	-28.81405
-102	-23.85923	-28.6763
-101	-23.8193	-28.54133
-100	-23.78125	-28.40904
-99	-23.74505	-28.2793
-98	-23.71066	-28.15203
-97	-23.67804	-28.02714
-96	-23.64714	-27.90455
-95	-23.61793	-27.78418
-94	-23.59038	-27.66597
-93	-23.56446	-27.54985
-92	-23.54014	-27.43577
-91	-23.51739	-27.32368
-90	-23.4962	-27.21354
-89	-23.47654	-27.10532
-88	-23.45839	-26.99898
-87	-23.44175	-26.8945
-86	-23.42659	-26.79186
-85	-23.41291	-26.69105
-84	-23.4007	-26.59207
-83	-23.38995	-26.4949
-82	-23.38066	-26.39955
-81	-23.37284	-26.30603
-80	-23.36647	-26.21434
-79	-23.36156	-26.12451
-78	-23.35813	-26.03655
-77	-23.35616	-25.95048
-76	-23.35567	-25.86634
-75	-23.35667	-25.78413
-74	-23.35917	-25.70391
-73	-23.36318	-25.6257
-72	-23.3687	-25.54954
-71	-23.37576	-25.47547
-70	-23.38436	-25.40353
-69	-23.39451	-25.33375
-68	-23.40624	-25.2662
-67	-23.41955	-25.2009
-66	-23.43445	-25.1379
-65	-23.45097	-25.07726
-64	-23.4691	-25.01901
-63	-23.48887	-24.96321
-62	-23.51028	-24.9099
-61	-23.53335	-24.85914
-60	-23.55807	-24.81096
-59	-23.58447	-24.76541
-58	-23.61255	-24.72255
-57	-23.64231	-24.68241
-56	-23.67375	-24.64503
-55	-23.70688	-24.61047
-54	-23.7417	-24.57876
-53	-23.77819	-24.54994
-52	-23.81637	-24.52405
-51	-23.85621	-24.50112
-50	-23.89771	-24.48119
-49	-23.94085	-24.46429
-48	-23.98562	-24.45044
-47	-24.032	-24.43966
-46	-24.07996	-24.43199
-45	-24.12947	-24.42743
-44	-24.18051	-24.42601
-43	-24.23304	-24.42773
-42	-24.28701	-24.43259
-41	-24.3424	-24.44061
-40	-24.39913	-24.45177
-39	-24.45717	-24.46607
-38	-24.51646	-24.4835
-37	-24.57692	-24.50403
-36	-24.6385	-24.52765
-35	-24.70112	-24.55433
-34	-24.7647	-24.58402
-33	-24.82916	-24.61668
-32	-24.8944	-24.65227
-31	-24.96032	-24.69073
-30	-25.02684	-24.73199
-29	-25.09383	-24.77599
-28	-25.16119	-24.82263
-27	-25.2288	-24.87184
-26	-25.29652	-24.92351
-25	-25.36424	-24.97754
-24	-25.43181	-25.03382
-23	-25.4991	-25.09222
-22	-25.56596	-25.15261
-21	-25.63223	-25.21485
-20	-25.69777	-25.27878
-19	-25.76241	-25.34424
-18	-25.826	-25.41106
-17	-25.88837	-25.47906
-16	-25.94935	-25.54805
-15	-26.00878	-25.61784
-14	-26.06648	-25.6882
-13	-26.12229	-25.75893
-12	-26.17604	-25.82981
-11	-26.22756	-25.9006
-10	-26.27668	-25.97107
-9	-26.32326	-26.04097
-8	-26.36713	-26.11007
-7	-26.40814	-26.17811
-6	-26.44614	-26.24485
-5	-26.48101	-26.31004
-4	-26.51262	-26.37343
-3	-26.54084	-26.43477
-2	-26.56558	-26.49384
-1	-26.58674	-26.5504
0	-26.60424	-26.60424
1	-26.61801	-26.65514
2	-26.62801	-26.7029
3	-26.63419	-26.74735
4	-26.63654	-26.78833
5	-26.63506	-26.82568
6	-26.62974	-26.85928
7	-26.62064	-26.88902
8	-26.60779	-26.91482
9	-26.59125	-26.93661
10	-26.57111	-26.95436
11	-26.54745	-26.96804
12	-26.5204	-26.97767
13	-26.49007	-26.98326
14	-26.45659	-26.98487
15	-26.42013	-26.98256
16	-26.38083	-26.97643
17	-26.33887	-26.96656
18	-26.29442	-26.95309
19	-26.24767	-26.93614
20	-26.1988	-26.91586
21	-26.14802	-26.89241
22	-26.09551	-26.86595
23	-26.04147	-26.83664
24	-25.9861	-26.80468
25	-25.9296	-26.77023
26	-25.87217	-26.73348
27	-25.81399	-26.6946
28	-25.75525	-26.65378
29	-25.69614	-26.61119
30	-25.63683	-26.567
31	-25.57749	-26.52138
32	-25.5183	-26.47449
33	-25.4594	-26.4265
34	-25.40095	-26.37754
35	-25.34309	-26.32776
36	-25.28596	-26.27729
37	-25.22967	-26.22626
38	-25.17435	-26.17478
39	-25.12011	-26.12297
40	-25.06705	-26.07093
41	-25.01526	-26.01875
42	-24.96483	-25.96651
43	-24.91584	-25.91429
44	-24.86835	-25.86217
45	-24.82244	-25.8102
46	-24.77815	-25.75844
47	-24.73553	-25.70694
48	-24.69464	-25.65574
49	-24.65551	-25.60488
50	-24.61816	-25.55438
51	-24.58263	-25.50428
52	-24.54893	-25.45459
53	-24.51708	-25.40533
54	-24.48709	-25.35651
55	-24.45898	-25.30814
56	-24.43274	-25.26023
57	-24.40837	-25.21277
58	-24.38587	-25.16577
59	-24.36525	-25.11922
60	-24.34648	-25.07312
61	-24.32955	-25.02746
62	-24.31447	-24.98223
63	-24.30121	-24.93744
64	-24.28976	-24.89306
65	-24.2801	-24.8491
66	-24.27222	-24.80554
67	-24.2661	-24.76237
68	-24.26173	-24.7196
69	-24.25909	-24.67721
70	-24.25817	-24.6352
71	-24.25894	-24.59357
72	-24.2614	-24.55231
73	-24.26553	-24.51144
74	-24.27133	-24.47096
75	-24.27878	-24.43086
76	-24.28787	-24.39117
77	-24.29859	-24.35189
78	-24.31095	-24.31303
79	-24.32495	-24.27462
80	-24.34057	-24.23668
81	-24.35783	-24.19922
82	-24.37672	-24.16228
83	-24.39727	-24.12588
84	-24.41947	-24.09005
85	-24.44335	-24.05484
86	-24.46891	-24.02027
87	-24.49618	-23.98639
88	-24.52518	-23.95325
89	-24.55594	-23.92088
90	-24.58848	-23.88933
91	-24.62284	-23.85867
92	-24.65905	-23.82893
93	-24.69714	-23.80017
94	-24.73715	-23.77245
95	-24.77914	-23.74583
96	-24.82314	-23.72037
97	-24.8692	-23.69612
98	-24.91737	-23.67316
99	-24.9677	-23.65154
100	-25.02025	-23.63134
101	-25.07507	-23.6126
102	-25.13223	-23.59541
103	-25.19177	-23.57983
104	-25.25377	-23.56592
105	-25.31828	-23.55376
106	-25.38536	-23.54341
107	-25.45508	-23.53494
108	-25.5275	-23.52841
109	-25.60269	-23.52391
110	-25.6807	-23.52148
111	-25.76159	-23.5212
112	-25.84543	-23.52314
113	-25.93226	-23.52736
114	-26.02215	-23.53393
115	-26.11515	-23.5429
116	-26.2113	-23.55436
117	-26.31064	-23.56835
118	-26.41321	-23.58494
119	-26.51904	-23.6042
120	-26.62815	-23.62617
121	-26.74056	-23.65092
122	-26.85627	-23.67851
123	-26.97528	-23.70899
124	-27.09756	-23.74242
125	-27.22309	-23.77884
126	-27.35183	-23.81832
127	-27.4837	-23.86089
128	-27.61864	-23.90661
129	-27.75653	-23.95553
130	-27.89726	-24.00769
131	-28.04068	-24.06314
132	-28.18663	-24.1219
133	-28.3349	-24.18404
134	-28.48526	-24.24958
135	-28.63745	-24.31855
136	-28.79119	-24.391
137	-28.94614	-24.46696
138	-29.10195	-24.54646
139	-29.2582	-24.62953
140	-29.41447	-24.7162
141	-29.57029	-24.80649
142	-29.72514	-24.90042
143	-29.8785	-24.99804
144	-30.02978	-25.09935
145	-30.17841	-25.20438
146	-30.32377	-25.31315
147	-30.46524	-25.42568
148	-30.6022	-25.54199
149	-30.73405	-25.66211
150	-30.86017	-25.78605
151	-30.98002	-25.91384
152	-31.09306	-26.04549
153	-31.19883	-26.18102
154	-31.29693	-26.32048
155	-31.38702	-26.46387
156	-31.46886	-26.61123
157	-31.54228	-26.76258
158	-31.60723	-26.91797
159	-31.66371	-27.07744
160	-31.71186	-27.24101
161	-31.75187	-27.40875
162	-31.78401	-27.5807
163	-31.80863	-27.75692
164	-31.82614	-27.93748
165	-31.83698	-28.12245
166	-31.84163	-28.3119
167	-31.84058	-28.50593
168	-31.83433	-28.70462
169	-31.82339	-28.90809
170	-31.80823	-29.11644
171	-31.78929	-29.32981
172	-31.76699	-29.54833
173	-31.74171	-29.77213
174	-31.71376	-30.00139
175	-31.68342	-30.23626
176	-31.65091	-30.47692
177	-31.61638	-30.72357
178	-31.57994	-30.97641
179	-31.54164	-31.23564
180	-31.50148	-31.50148
