# Supplementary material for: A Triple-Band Broadband Miniature Antenna Design for Implantable Continuous Glucose Monitoring
Source: Hindawi journal article supplement (doi:10.1155/2023/8123177), 2023-10-13
Supplement: f1 [file 8123177.f1.zip › Figure7(b) (1).txt]

Freq [GHz]	dB(S(1,1)) []	dB(S(1,1))	Freq(Hz)	S11(DB)	S11(DB)
0.5	-2.09912	-2.00228	0.5	-1.51159	-1.4805
0.51	-2.04733	-1.95937	0.515	-1.48659	-1.4285
0.52	-1.99956	-1.92047	0.53	-1.48402	-1.39512
0.53	-1.95581	-1.88553	0.545	-1.47082	-1.36498
0.54	-1.91611	-1.85458	0.56	-1.48965	-1.36675
0.55	-1.88051	-1.82765	0.575	-1.53727	-1.38132
0.56	-1.84908	-1.80481	0.59	-1.61545	-1.42519
0.57	-1.82195	-1.78617	0.605	-1.70118	-1.47815
0.58	-1.79928	-1.77186	0.62	-1.84836	-1.56803
0.59	-1.78127	-1.7621	0.635	-2.01773	-1.69114
0.6	-1.76818	-1.75713	0.65	-2.24046	-1.86386
0.61	-1.76033	-1.75725	0.665	-2.51683	-2.06378
0.62	-1.7581	-1.76286	0.68	-2.84359	-2.32073
0.63	-1.76199	-1.77443	0.695	-3.23194	-2.62891
0.64	-1.77259	-1.79253	0.71	-3.68463	-2.99345
0.65	-1.7906	-1.81788	0.725	-4.22242	-3.44444
0.66	-1.8169	-1.85132	0.74	-4.85981	-3.98547
0.67	-1.85256	-1.89391	0.755	-5.58107	-4.63104
0.68	-1.89887	-1.94691	0.77	-6.41505	-5.3697
0.69	-1.95744	-2.01188	0.785	-7.40252	-6.21257
0.7	-2.03022	-2.09072	0.8	-8.57047	-7.19352
0.71	-2.11964	-2.18581	0.815	-9.95078	-8.30624
0.72	-2.22872	-2.30003	0.83	-11.63682	-9.6355
0.73	-2.3612	-2.43701	0.845	-13.69435	-11.2215
0.74	-2.52178	-2.60128	0.86	-16.28674	-13.18728
0.75	-2.71639	-2.7985	0.875	-19.79109	-15.64384
0.76	-2.95251	-3.03583	0.89	-24.87108	-18.8184
0.77	-3.23966	-3.32238	0.905	-29.66973	-23.36011
0.78	-3.59001	-3.66976	0.92	-24.88448	-32.47631
0.79	-4.0192	-4.09289	0.935	-20.4338	-34.42638
0.8	-4.54747	-4.61113	0.95	-17.54836	-24.50326
0.81	-5.20129	-5.24984	0.965	-15.56393	-20.08208
0.82	-6.01573	-6.04281	0.98	-14.12496	-17.3595
0.83	-7.03837	-7.0362	0.995	-13.0517	-15.43345
0.84	-8.33625	-8.29564	1.01	-12.24741	-13.97187
0.85	-10.00912	-9.92016	1.025	-11.66483	-12.85474
0.86	-12.21688	-12.07294	1.04	-11.26272	-11.9699
0.87	-15.23339	-15.05493	1.055	-11.01688	-11.2567
0.88	-19.43828	-19.46027	1.07	-10.89266	-10.69792
0.89	-23.17155	-24.94476	1.085	-10.87733	-10.25512
0.9	-20.1901	-21.86537	1.1	-10.98686	-9.93786
0.91	-16.21599	-17.03387	1.115	-11.18075	-9.71621
0.92	-13.42486	-13.88288	1.13	-11.43291	-9.5847
0.93	-11.44479	-11.71672	1.145	-11.77146	-9.53997
0.94	-9.98533	-10.14245	1.16	-12.16088	-9.55489
0.95	-8.87915	-8.95721	1.175	-12.62369	-9.64424
0.96	-8.02518	-8.04481	1.19	-13.11607	-9.79986
0.97	-7.35842	-7.33271	1.205	-13.64328	-10.00909
0.98	-6.83491	-6.77268	1.22	-14.17178	-10.27622
0.99	-6.42376	-6.33119	1.235	-14.64932	-10.57519
1	-6.10267	-5.98417	1.25	-15.08396	-10.89776
1.01	-5.85521	-5.71395	1.265	-15.46471	-11.28603
1.02	-5.66908	-5.50736	1.28	-15.73969	-11.62845
1.03	-5.53499	-5.35442	1.295	-15.92342	-11.98647
1.04	-5.44588	-5.24755	1.31	-15.98256	-12.31232
1.05	-5.39635	-5.18096	1.325	-15.90394	-12.57716
1.06	-5.3823	-5.15022	1.34	-15.74797	-12.79482
1.07	-5.40062	-5.15195	1.355	-15.43533	-12.89422
1.08	-5.44899	-5.18362	1.37	-15.12971	-12.90251
1.09	-5.52574	-5.24334	1.385	-14.74522	-12.79469
1.1	-5.62966	-5.32975	1.4	-14.2846	-12.55974
1.11	-5.76001	-5.44194	1.415	-13.81514	-12.23064
1.12	-5.91635	-5.57932	1.43	-13.34082	-11.87235
1.13	-6.09852	-5.74163	1.445	-12.85899	-11.47127
1.14	-6.3066	-5.9288	1.46	-12.33605	-11.01161
1.15	-6.54083	-6.14098	1.475	-11.80855	-10.58417
1.16	-6.80157	-6.37846	1.49	-11.31518	-10.1704
1.17	-7.08924	-6.64162	1.505	-10.82779	-9.78908
1.18	-7.40429	-6.93092	1.52	-10.3864	-9.44857
1.19	-7.74704	-7.24681	1.535	-9.9216	-9.12101
1.2	-8.11765	-7.58968	1.55	-9.48587	-8.82886
1.21	-8.51593	-7.95979	1.565	-9.09126	-8.56381
1.22	-8.94111	-8.35711	1.58	-8.71052	-8.3222
1.23	-9.39162	-8.78123	1.595	-8.36559	-8.11427
1.24	-9.86466	-9.23107	1.61	-8.03357	-7.89813
1.25	-10.35571	-9.70464	1.625	-7.73621	-7.71234
1.26	-10.8579	-10.19861	1.64	-7.46004	-7.54151
1.27	-11.36132	-10.70786	1.655	-7.18498	-7.37047
1.28	-11.85231	-11.22478	1.67	-6.96105	-7.21557
1.29	-12.31312	-11.73867	1.685	-6.73373	-7.05307
1.3	-12.72229	-12.2351	1.7	-6.55307	-6.90124
1.31	-13.05635	-12.69579	1.715	-6.3734	-6.75854
1.32	-13.29301	-13.09919	1.73	-6.21088	-6.60887
1.33	-13.41556	-13.42247	1.745	-6.07652	-6.46287
1.34	-13.41694	-13.64492	1.76	-5.96339	-6.34472
1.35	-13.30157	-13.7521	1.775	-5.85261	-6.20266
1.36	-13.08408	-13.73937	1.79	-5.76259	-6.07826
1.37	-12.78552	-13.61305	1.805	-5.69873	-5.96589
1.38	-12.42895	-13.38862	1.82	-5.644	-5.85164
1.39	-12.03591	-13.08695	1.835	-5.60984	-5.76434
1.4	-11.62446	-12.73014	1.85	-5.59736	-5.67832
1.41	-11.20862	-12.3385	1.865	-5.60348	-5.60116
1.42	-10.79858	-11.92887	1.88	-5.64093	-5.54318
1.43	-10.40141	-11.51425	1.895	-5.66888	-5.48186
1.44	-10.0217	-11.10406	1.91	-5.72623	-5.45016
1.45	-9.66227	-10.70482	1.925	-5.79047	-5.41695
1.46	-9.32464	-10.32074	1.94	-5.88669	-5.40633
1.47	-9.00943	-9.95438	1.955	-5.97538	-5.40529
1.48	-8.71667	-9.60703	1.97	-6.09062	-5.41713
1.49	-8.44597	-9.27912	1.985	-6.22311	-5.44929
1.5	-8.19668	-8.97045	2	-6.36934	-5.48505
1.51	-7.96796	-8.68034	2.015	-6.52921	-5.53683
1.52	-7.75886	-8.40774	2.03	-6.71012	-5.61232
1.53	-7.56836	-8.15135	2.045	-6.91073	-5.69748
1.54	-7.39535	-7.90961	2.06	-7.11844	-5.79137
1.55	-7.2387	-7.68082	2.075	-7.33561	-5.89709
1.56	-7.09718	-7.46316	2.09	-7.57416	-6.01589
1.57	-6.96954	-7.25482	2.105	-7.83311	-6.16281
1.58	-6.85443	-7.0541	2.12	-8.11497	-6.32703
1.59	-6.75043	-6.85955	2.135	-8.41863	-6.50198
1.6	-6.65603	-6.67011	2.15	-8.7368	-6.70723
1.61	-6.56967	-6.48514	2.165	-9.05173	-6.93143
1.62	-6.48971	-6.30448	2.18	-9.39682	-7.16811
1.63	-6.41447	-6.12839	2.195	-9.73963	-7.42284
1.64	-6.3423	-5.95741	2.21	-10.08874	-7.7051
1.65	-6.27157	-5.79224	2.225	-10.43406	-8.00812
1.66	-6.2008	-5.63359	2.24	-10.77959	-8.32788
1.67	-6.12864	-5.48211	2.255	-11.10562	-8.65696
1.68	-6.05402	-5.33828	2.27	-11.43676	-9.0246
1.69	-5.97614	-5.20242	2.285	-11.75938	-9.40076
1.7	-5.8945	-5.0747	2.3	-12.04939	-9.80527
1.71	-5.80897	-4.95515	2.315	-12.31378	-10.21515
1.72	-5.71973	-4.84368	2.33	-12.55963	-10.65505
1.73	-5.62723	-4.74016	2.345	-12.76198	-11.07655
1.74	-5.5322	-4.6444	2.36	-12.93562	-11.52759
1.75	-5.43553	-4.5562	2.375	-13.09676	-11.97843
1.76	-5.33824	-4.47537	2.39	-13.23675	-12.44661
1.77	-5.24142	-4.40172	2.405	-13.34971	-12.91325
1.78	-5.14615	-4.33512	2.42	-13.47063	-13.40167
1.79	-5.05348	-4.27542	2.435	-13.54096	-13.83171
1.8	-4.96441	-4.22257	2.45	-13.61444	-14.23818
1.81	-4.87985	-4.17651	2.465	-13.69352	-14.62397
1.82	-4.80062	-4.13724	2.48	-13.75106	-14.98653
1.83	-4.72744	-4.10482	2.495	-13.81037	-15.32081
1.84	-4.66097	-4.07932	2.51	-13.88878	-15.63331
1.85	-4.6018	-4.06089	2.525	-13.97495	-15.90609
1.86	-4.55044	-4.0497	2.54	-14.04511	-16.12818
1.87	-4.50738	-4.04599	2.555	-14.15116	-16.37314
1.88	-4.47309	-4.05002	2.57	-14.29393	-16.57097
1.89	-4.44801	-4.06213	2.585	-14.42954	-16.77516
1.9	-4.43261	-4.08269	2.6	-14.60761	-16.95233
1.91	-4.42735	-4.11213	2.615	-14.78967	-17.06464
1.92	-4.43274	-4.15092	2.63	-14.97442	-17.19028
1.93	-4.44934	-4.19962	2.645	-15.18267	-17.28523
1.94	-4.47773	-4.2588	2.66	-15.41648	-17.34702
1.95	-4.51859	-4.32913	2.675	-15.60923	-17.36565
1.96	-4.57266	-4.41132	2.69	-15.85501	-17.3641
1.97	-4.64074	-4.50613	2.705	-16.15406	-17.37214
1.98	-4.72376	-4.6144	2.72	-16.44284	-17.30805
1.99	-4.8227	-4.73703	2.735	-16.75414	-17.18567
2	-4.93868	-4.87497	2.75	-17.07297	-17.05935
2.01	-5.0759	-4.98438	2.765	-17.394	-16.85284
2.02	-5.23297	-5.12285	2.78	-17.67541	-16.57905
2.03	-5.41202	-5.29147	2.795	-17.94963	-16.30908
2.04	-5.61546	-5.49123	2.81	-18.27974	-16.01898
2.05	-5.84602	-5.7231	2.825	-18.64154	-15.72159
2.06	-6.10678	-5.98813	2.84	-18.97619	-15.33803
2.07	-6.40125	-6.28759	2.855	-19.32823	-14.96919
2.08	-6.73338	-6.62307	2.87	-19.68907	-14.59925
2.09	-7.10769	-6.99661	2.885	-20.02922	-14.25341
2.1	-7.52931	-7.41083	2.9	-20.32378	-13.87982
2.11	-8.00412	-7.86909	2.915	-20.5185	-13.53161
2.12	-8.53884	-8.37566	2.93	-20.68628	-13.1739
2.13	-9.14121	-8.9359	2.945	-20.79087	-12.86471
2.14	-9.82017	-9.55657	2.96	-20.82158	-12.53576
2.15	-10.58602	-10.24605	2.975	-20.72038	-12.20241
2.16	-11.45052	-11.01482	2.99	-20.63357	-11.89741
2.17	-12.42673	-11.87585	3.005	-20.41305	-11.61595
2.18	-13.52805	-12.84506	3.02	-20.06987	-11.34004
2.19	-14.76501	-13.94149	3.035	-19.73794	-11.10667
2.2	-16.1364	-15.18625	3.05	-19.35171	-10.89559
2.21	-17.60656	-16.59756	3.065	-18.94321	-10.68392
2.22	-19.05556	-18.1735	3.08	-18.50324	-10.47917
2.23	-20.21085	-19.84064	3.095	-18.07148	-10.29727
2.24	-20.69014	-21.33539	3.11	-17.66341	-10.12845
2.25	-20.32614	-22.11176	3.125	-17.21486	-9.95835
2.26	-19.373	-21.74015	3.14	-16.81505	-9.83928
2.27	-18.20478	-20.51249	3.155	-16.40351	-9.69833
2.28	-17.05223	-19.01313	3.17	-16.04322	-9.59933
2.29	-16.00804	-17.57359	3.185	-15.72867	-9.52141
2.3	-15.09597	-16.30032	3.2	-15.39748	-9.4473
2.31	-14.31309	-15.20718	3.215	-15.11548	-9.39633
2.32	-13.64814	-14.27991	3.23	-14.79538	-9.32195
2.33	-13.08861	-13.49871	3.245	-14.481	-9.27036
2.34	-12.6232	-12.84498	3.26	-14.16713	-9.20457
2.35	-12.24262	-12.30301	3.275	-13.87357	-9.16082
2.36	-11.93977	-11.86012	3.29	-13.59199	-9.13471
2.37	-11.70978	-11.50641	3.305	-13.34053	-9.11625
2.38	-11.55009	-11.23465	3.32	-13.09982	-9.10935
2.39	-11.46069	-11.04031	3.335	-12.88934	-9.13398
2.4	-11.44449	-10.92196	3.35	-12.64897	-9.12786
2.41	-11.50803	-10.88222	3.365	-12.42178	-9.1336
2.42	-11.66224	-10.9293	3.38	-12.20136	-9.14441
2.43	-11.92303	-11.07932	3.395	-11.99164	-9.16893
2.44	-12.31039	-11.35859	3.41	-11.80864	-9.21308
2.45	-12.84254	-11.80155	3.425	-11.62018	-9.25581
2.46	-13.51785	-12.43282	3.44	-11.43186	-9.28917
2.47	-14.27551	-13.21607	3.455	-11.25455	-9.35615
2.48	-14.94993	-13.99484	3.47	-11.06879	-9.40284
2.49	-15.31034	-14.55479	3.485	-10.87989	-9.47001
2.5	-15.2563	-14.82796	3.5	-10.70396	-9.50991
2.51	-14.92648	-14.93271
2.52	-14.53424	-15.0122
2.53	-14.21113	-15.14498
2.54	-14.00086	-15.35698
2.55	-13.90255	-15.64949
2.56	-13.90047	-16.01466
2.57	-13.97674	-16.44107
2.58	-14.11526	-16.91434
2.59	-14.30215	-17.41564
2.6	-14.52508	-17.91917
2.61	-14.77214	-18.38968
2.62	-15.03091	-18.78192
2.63	-15.28744	-19.0447
2.64	-15.52565	-19.13162
2.65	-15.72715	-19.01603
2.66	-15.87199	-18.7015
2.67	-15.94045	-18.21985
2.68	-15.91608	-17.61816
2.69	-15.78894	-16.94426
2.7	-15.55818	-16.2377
2.71	-15.23248	-15.52712
2.72	-14.82814	-14.83133
2.73	-14.36577	-14.16176
2.74	-13.86672	-13.52471
2.75	-13.35046	-12.92319
2.76	-12.83307	-12.35816
2.77	-12.32677	-11.82933
2.78	-11.84018	-11.33575
2.79	-11.37884	-10.87609
2.8	-10.94583	-10.44883
2.81	-10.54242	-10.05246
2.82	-10.16857	-9.68546
2.83	-9.82343	-9.34639
2.84	-9.50563	-9.0339
2.85	-9.21354	-8.74677
2.86	-8.94551	-8.48383
2.87	-8.6999	-8.24407
2.88	-8.47527	-8.02653
2.89	-8.27034	-7.83038
2.9	-8.08406	-7.65487
2.91	-7.91563	-7.49934
2.92	-7.76449	-7.3632
2.93	-7.6303	-7.24596
2.94	-7.51298	-7.14719
2.95	-7.41269	-7.06651
2.96	-7.32981	-7.00365
2.97	-7.26494	-6.95834
2.98	-7.21895	-6.9304
2.99	-7.1929	-6.91967
3	-7.18807	-6.92602
3.01	-7.20592	-6.94934
3.02	-7.24808	-6.9895
3.03	-7.31624	-7.04633
3.04	-7.41208	-7.11961
3.05	-7.53708	-7.209
3.06	-7.69231	-7.31399
3.07	-7.87809	-7.43384
3.08	-8.09354	-7.56751
3.09	-8.33605	-7.71352
3.1	-8.6006	-7.86984
3.11	-8.87911	-8.03381
3.12	-9.15989	-8.2019
3.13	-9.42752	-8.36966
3.14	-9.66356	-8.53157
3.15	-9.84833	-8.68106
3.16	-9.96379	-8.81056
3.17	-9.99695	-8.91182
3.18	-9.94256	-8.97639
3.19	-9.80395	-8.9963
3.2	-9.59162	-8.96493
3.21	-9.32039	-8.8778
3.22	-9.00625	-8.73319
3.23	-8.664	-8.53242
3.24	-8.30597	-8.27975
3.25	-7.94169	-7.98191
3.26	-7.57821	-7.64761
3.27	-7.22063	-7.287
3.28	-6.87272	-6.91136
3.29	-6.53741	-6.53287
3.3	-6.21711	-6.16417
3.31	-5.91386	-5.81753
3.32	-5.62937	-5.50335
3.33	-5.36492	-5.22835
3.34	-5.12125	-4.99414
3.35	-4.89851	-4.79729
3.36	-4.69623	-4.63076
3.37	-4.51344	-4.48622
3.38	-4.34874	-4.3561
3.39	-4.2005	-4.23466
3.4	-4.06697	-4.11822
3.41	-3.94641	-4.00479
3.42	-3.83719	-3.89362
3.43	-3.7378	-3.78462
3.44	-3.64692	-3.6781
3.45	-3.5634	-3.57448
3.46	-3.48626	-3.47416
3.47	-3.41464	-3.37751
3.48	-3.34786	-3.28478
3.49	-3.28532	-3.19614
3.5	-3.22653	-3.11168
