# Supplementary material for: A Triple-Band Broadband Miniature Antenna Design for Implantable Continuous Glucose Monitoring
Source: Hindawi journal article supplement (doi:10.1155/2023/8123177), 2023-10-13
Supplement: f1 [file 8123177.f1.zip › Figure9(a) (1).txt]

-39.49067	-180	-37.92416	-37.92416	-39.49067
-39.47374	-179	-37.93632	-37.92513	-39.50225
-39.45923	-178	-37.94828	-37.92858	-39.51368
-39.44714	-177	-37.96003	-37.93449	-39.52494
-39.43747	-176	-37.97156	-37.94288	-39.53604
-39.43021	-175	-37.98288	-37.95375	-39.54695
-39.42537	-174	-37.99398	-37.96711	-39.55768
-39.42295	-173	-38.00485	-37.98296	-39.56821
-39.42295	-172	-38.0155	-38.00132	-39.57854
-39.42537	-171	-38.02592	-38.02219	-39.58866
-39.43022	-170	-38.03611	-38.04559	-39.59856
-39.4375	-169	-38.04607	-38.07152	-39.60824
-39.44721	-168	-38.0558	-38.10001	-39.61769
-39.45937	-167	-38.0653	-38.13106	-39.6269
-39.47398	-166	-38.07456	-38.1647	-39.63588
-39.49105	-165	-38.0836	-38.20094	-39.64461
-39.5106	-164	-38.09241	-38.2398	-39.65308
-39.53262	-163	-38.10099	-38.2813	-39.66131
-39.55714	-162	-38.10935	-38.32546	-39.66927
-39.58417	-161	-38.11748	-38.37231	-39.67698
-39.61372	-160	-38.12539	-38.42188	-39.68441
-39.64582	-159	-38.13309	-38.47419	-39.69158
-39.68047	-158	-38.14058	-38.52927	-39.69849
-39.71769	-157	-38.14785	-38.58715	-39.70511
-39.75751	-156	-38.15493	-38.64787	-39.71147
-39.79995	-155	-38.1618	-38.71145	-39.71755
-39.84503	-154	-38.16848	-38.77794	-39.72335
-39.89277	-153	-38.17497	-38.84738	-39.72888
-39.94321	-152	-38.18128	-38.91981	-39.73414
-39.99636	-151	-38.18741	-38.99527	-39.73912
-40.05226	-150	-38.19338	-39.07381	-39.74382
-40.11094	-149	-38.19918	-39.15548	-39.74826
-40.17243	-148	-38.20482	-39.24033	-39.75242
-40.23677	-147	-38.21032	-39.32842	-39.75631
-40.30399	-146	-38.21567	-39.41981	-39.75994
-40.37413	-145	-38.2209	-39.51455	-39.76331
-40.44724	-144	-38.226	-39.61271	-39.76641
-40.52335	-143	-38.23098	-39.71437	-39.76926
-40.60251	-142	-38.23586	-39.81959	-39.77185
-40.68477	-141	-38.24064	-39.92846	-39.7742
-40.77018	-140	-38.24532	-40.04105	-39.7763
-40.8588	-139	-38.24993	-40.15745	-39.77817
-40.95067	-138	-38.25446	-40.27776	-39.77979
-41.04586	-137	-38.25894	-40.40207	-39.7812
-41.14443	-136	-38.26335	-40.53048	-39.78238
-41.24644	-135	-38.26773	-40.66311	-39.78334
-41.35197	-134	-38.27207	-40.80007	-39.78409
-41.46109	-133	-38.27638	-40.94148	-39.78464
-41.57386	-132	-38.28068	-41.08748	-39.78499
-41.69038	-131	-38.28497	-41.2382	-39.78515
-41.81072	-130	-38.28927	-41.3938	-39.78513
-41.93497	-129	-38.29358	-41.55442	-39.78493
-42.06323	-128	-38.29791	-41.72024	-39.78456
-42.1956	-127	-38.30227	-41.89144	-39.78404
-42.33217	-126	-38.30667	-42.0682	-39.78336
-42.47306	-125	-38.31112	-42.25074	-39.78253
-42.61837	-124	-38.31563	-42.43926	-39.78157
-42.76823	-123	-38.32021	-42.634	-39.78048
-42.92277	-122	-38.32487	-42.83521	-39.77927
-43.0821	-121	-38.32961	-43.04316	-39.77795
-43.24638	-120	-38.33444	-43.25813	-39.77653
-43.41575	-119	-38.33938	-43.48043	-39.775
-43.59036	-118	-38.34443	-43.71039	-39.77339
-43.77036	-117	-38.34959	-43.94837	-39.77171
-43.95593	-116	-38.35488	-44.19473	-39.76995
-44.14723	-115	-38.3603	-44.4499	-39.76813
-44.34445	-114	-38.36587	-44.71432	-39.76626
-44.54778	-113	-38.37158	-44.98845	-39.76434
-44.75742	-112	-38.37744	-45.27282	-39.76238
-44.97355	-111	-38.38346	-45.56798	-39.7604
-45.19639	-110	-38.38965	-45.87451	-39.75839
-45.42616	-109	-38.39601	-46.19305	-39.75637
-45.66306	-108	-38.40255	-46.5243	-39.75435
-45.90731	-107	-38.40927	-46.86896	-39.75233
-46.15912	-106	-38.41618	-47.22784	-39.75032
-46.4187	-105	-38.42328	-47.60173	-39.74833
-46.68624	-104	-38.43057	-47.9915	-39.74637
-46.96192	-103	-38.43806	-48.39802	-39.74444
-47.24589	-102	-38.44576	-48.82218	-39.74255
-47.53825	-101	-38.45366	-49.26483	-39.74071
-47.83908	-100	-38.46177	-49.72673	-39.73892
-48.14834	-99	-38.47009	-50.20847	-39.73719
-48.46593	-98	-38.47862	-50.71039	-39.73553
-48.79161	-97	-38.48736	-51.2323	-39.73395
-49.12498	-96	-38.49632	-51.77334	-39.73244
-49.46541	-95	-38.50549	-52.33145	-39.73102
-49.81202	-94	-38.51487	-52.90295	-39.72969
-50.16357	-93	-38.52447	-53.48171	-39.72846
-50.51839	-92	-38.53429	-54.05826	-39.72733
-50.87431	-91	-38.54431	-54.61871	-39.72631
-51.22851	-90	-38.55455	-55.14388	-39.7254
-51.57744	-89	-38.56499	-55.6091	-39.7246
-51.91674	-88	-38.57564	-55.98568	-39.72393
-52.24118	-87	-38.58649	-56.24458	-39.72338
-52.54466	-86	-38.59755	-56.36244	-39.72297
-52.82039	-85	-38.60879	-56.32789	-39.72268
-53.06106	-84	-38.62023	-56.14509	-39.72253
-53.25938	-83	-38.63186	-55.83236	-39.72252
-53.40857	-82	-38.64367	-55.41689	-39.72266
-53.50305	-81	-38.65565	-54.92816	-39.72293
-53.53911	-80	-38.6678	-54.39306	-39.72336
-53.51534	-79	-38.68012	-53.83344	-39.72394
-53.43281	-78	-38.69259	-53.26562	-39.72467
-53.29499	-77	-38.70521	-52.70104	-39.72555
-53.10724	-76	-38.71797	-52.14731	-39.72659
-52.8762	-75	-38.73086	-51.60916	-39.72778
-52.60916	-74	-38.74388	-51.08935	-39.72913
-52.31344	-73	-38.75702	-50.58925	-39.73064
-51.99592	-72	-38.77026	-50.10934	-39.73231
-51.6628	-71	-38.78359	-49.64949	-39.73414
-51.31943	-70	-38.79701	-49.20923	-39.73613
-50.97028	-69	-38.81051	-48.78786	-39.73827
-50.61901	-68	-38.82407	-48.38456	-39.74058
-50.26851	-67	-38.83768	-47.99846	-39.74304
-49.92104	-66	-38.85133	-47.62869	-39.74566
-49.57834	-65	-38.86502	-47.27438	-39.74844
-49.24168	-64	-38.87872	-46.93468	-39.75137
-48.91201	-63	-38.89242	-46.60881	-39.75446
-48.58997	-62	-38.90612	-46.29602	-39.7577
-48.27599	-61	-38.91979	-45.9956	-39.76108
-47.97033	-60	-38.93343	-45.70689	-39.76462
-47.67312	-59	-38.94702	-45.42929	-39.7683
-47.38438	-58	-38.96055	-45.16222	-39.77212
-47.10407	-57	-38.97401	-44.90515	-39.77608
-46.83209	-56	-38.98737	-44.6576	-39.78017
-46.56828	-55	-39.00062	-44.41911	-39.7844
-46.31248	-54	-39.01376	-44.18926	-39.78876
-46.0645	-53	-39.02676	-43.96764	-39.79324
-45.82412	-52	-39.03961	-43.75391	-39.79785
-45.59115	-51	-39.05229	-43.54772	-39.80257
-45.36536	-50	-39.0648	-43.34875	-39.8074
-45.14654	-49	-39.07711	-43.1567	-39.81235
-44.93448	-48	-39.0892	-42.97132	-39.81739
-44.72897	-47	-39.10108	-42.79234	-39.82253
-44.52982	-46	-39.11271	-42.61951	-39.82777
-44.33683	-45	-39.12409	-42.45263	-39.83309
-44.1498	-44	-39.13519	-42.29148	-39.8385
-43.96856	-43	-39.14601	-42.13587	-39.84398
-43.79293	-42	-39.15653	-41.98561	-39.84953
-43.62275	-41	-39.16673	-41.84054	-39.85514
-43.45785	-40	-39.1766	-41.70049	-39.86081
-43.29809	-39	-39.18613	-41.56531	-39.86653
-43.14332	-38	-39.19529	-41.43486	-39.8723
-42.9934	-37	-39.20408	-41.30902	-39.8781
-42.8482	-36	-39.21248	-41.18765	-39.88393
-42.7076	-35	-39.22048	-41.07064	-39.88978
-42.57146	-34	-39.22806	-40.95787	-39.89564
-42.43969	-33	-39.23522	-40.84925	-39.90152
-42.31217	-32	-39.24193	-40.74468	-39.90739
-42.18879	-31	-39.24818	-40.64406	-39.91325
-42.06947	-30	-39.25397	-40.54731	-39.91909
-41.95411	-29	-39.25928	-40.45434	-39.92491
-41.84261	-28	-39.2641	-40.36508	-39.93069
-41.7349	-27	-39.26842	-40.27946	-39.93643
-41.6309	-26	-39.27222	-40.19741	-39.94212
-41.53052	-25	-39.27551	-40.11887	-39.94775
-41.4337	-24	-39.27825	-40.04376	-39.95331
-41.34037	-23	-39.28046	-39.97205	-39.95878
-41.25046	-22	-39.28212	-39.90366	-39.96417
-41.16392	-21	-39.28321	-39.83856	-39.96946
-41.08067	-20	-39.28374	-39.7767	-39.97465
-41.00067	-19	-39.28369	-39.71802	-39.97971
-40.92387	-18	-39.28306	-39.66249	-39.98466
-40.85021	-17	-39.28184	-39.61008	-39.98946
-40.77964	-16	-39.28003	-39.56073	-39.99412
-40.71212	-15	-39.27761	-39.51443	-39.99862
-40.64761	-14	-39.2746	-39.47113	-40.00296
-40.58607	-13	-39.27097	-39.43081	-40.00713
-40.52745	-12	-39.26673	-39.39344	-40.0111
-40.47173	-11	-39.26188	-39.35899	-40.01489
-40.41886	-10	-39.25641	-39.32744	-40.01847
-40.36881	-9	-39.25032	-39.29878	-40.02184
-40.32156	-8	-39.24361	-39.27297	-40.02498
-40.27707	-7	-39.23628	-39.25	-40.02789
-40.23532	-6	-39.22833	-39.22986	-40.03056
-40.19628	-5	-39.21976	-39.21254	-40.03298
-40.15993	-4	-39.21058	-39.19801	-40.03513
-40.12625	-3	-39.20077	-39.18627	-40.03702
-40.09521	-2	-39.19036	-39.17731	-40.03863
-40.06679	-1	-39.17933	-39.17112	-40.03995
-40.04098	0	-39.16769	-39.16769	-40.04098
-40.01776	1	-39.15546	-39.16703	-40.04171
-39.99712	2	-39.14263	-39.16913	-40.04212
-39.97904	3	-39.1292	-39.17398	-40.04221
-39.9635	4	-39.1152	-39.18159	-40.04198
-39.9505	5	-39.10061	-39.19196	-40.04141
-39.94003	6	-39.08545	-39.2051	-40.04051
-39.93208	7	-39.06973	-39.221	-40.03926
-39.92664	8	-39.05346	-39.23967	-40.03765
-39.92369	9	-39.03664	-39.26113	-40.03569
-39.92325	10	-39.01929	-39.28538	-40.03336
-39.9253	11	-39.00142	-39.31243	-40.03067
-39.92984	12	-38.98303	-39.3423	-40.0276
-39.93687	13	-38.96413	-39.375	-40.02416
-39.94638	14	-38.94475	-39.41055	-40.02033
-39.95838	15	-38.92489	-39.44896	-40.01613
-39.97286	16	-38.90456	-39.49026	-40.01154
-39.98984	17	-38.88378	-39.53447	-40.00655
-40.0093	18	-38.86257	-39.5816	-40.00119
-40.03127	19	-38.84092	-39.63169	-39.99543
-40.05573	20	-38.81887	-39.68477	-39.98927
-40.0827	21	-38.79642	-39.74086	-39.98273
-40.11219	22	-38.7736	-39.79999	-39.9758
-40.1442	23	-38.7504	-39.8622	-39.96848
-40.17875	24	-38.72687	-39.92752	-39.96077
-40.21583	25	-38.70299	-39.99599	-39.95268
-40.25548	26	-38.67881	-40.06766	-39.9442
-40.29769	27	-38.65432	-40.14256	-39.93535
-40.34248	28	-38.62955	-40.22074	-39.92612
-40.38987	29	-38.60452	-40.30225	-39.91652
-40.43987	30	-38.57924	-40.38713	-39.90656
-40.49249	31	-38.55373	-40.47545	-39.89623
-40.54777	32	-38.52801	-40.56726	-39.88555
-40.60571	33	-38.5021	-40.66262	-39.87453
-40.66633	34	-38.47601	-40.76159	-39.86316
-40.72966	35	-38.44976	-40.86424	-39.85146
-40.79572	36	-38.42338	-40.97063	-39.83944
-40.86452	37	-38.39687	-41.08085	-39.82711
-40.9361	38	-38.37026	-41.19496	-39.81446
-41.01048	39	-38.34357	-41.31305	-39.80152
-41.08769	40	-38.31682	-41.43521	-39.7883
-41.16775	41	-38.29001	-41.56151	-39.7748
-41.25068	42	-38.26318	-41.69206	-39.76103
-41.33653	43	-38.23634	-41.82696	-39.74701
-41.4253	44	-38.20951	-41.96629	-39.73275
-41.51705	45	-38.1827	-42.11017	-39.71826
-41.61179	46	-38.15594	-42.25872	-39.70355
-41.70955	47	-38.12924	-42.41204	-39.68864
-41.81037	48	-38.10262	-42.57025	-39.67353
-41.91428	49	-38.0761	-42.73348	-39.65825
-42.0213	50	-38.04969	-42.90186	-39.6428
-42.13147	51	-38.02342	-43.07551	-39.6272
-42.24482	52	-37.99729	-43.25458	-39.61146
-42.36137	53	-37.97134	-43.4392	-39.5956
-42.48116	54	-37.94556	-43.62951	-39.57962
-42.6042	55	-37.91998	-43.82566	-39.56356
-42.73052	56	-37.89462	-44.02778	-39.54741
-42.86015	57	-37.86949	-44.23602	-39.5312
-42.99309	58	-37.84461	-44.45052	-39.51494
-43.12937	59	-37.81999	-44.67139	-39.49864
-43.26899	60	-37.79565	-44.89876	-39.48232
-43.41194	61	-37.7716	-45.13273	-39.46599
-43.55823	62	-37.74785	-45.37338	-39.44967
-43.70785	63	-37.72442	-45.62077	-39.43337
-43.86076	64	-37.70133	-45.87493	-39.41711
-44.01693	65	-37.67858	-46.13581	-39.4009
-44.17631	66	-37.65619	-46.40333	-39.38476
-44.33884	67	-37.63418	-46.67733	-39.3687
-44.50444	68	-37.61255	-46.95753	-39.35273
-44.67299	69	-37.59131	-47.24356	-39.33687
-44.84437	70	-37.57048	-47.53487	-39.32113
-45.01842	71	-37.55007	-47.83074	-39.30553
-45.19494	72	-37.53009	-48.13022	-39.29008
-45.37373	73	-37.51055	-48.43207	-39.27479
-45.5545	74	-37.49146	-48.73475	-39.25968
-45.73694	75	-37.47283	-49.03631	-39.24475
-45.92069	76	-37.45466	-49.33439	-39.23003
-46.10532	77	-37.43697	-49.62613	-39.21551
-46.29034	78	-37.41976	-49.90814	-39.20123
-46.4752	79	-37.40305	-50.17655	-39.18718
-46.65926	80	-37.38684	-50.42697	-39.17338
-46.84181	81	-37.37113	-50.65464	-39.15984
-47.02205	82	-37.35594	-50.85456	-39.14657
-47.19908	83	-37.34127	-51.02177	-39.13358
-47.37194	84	-37.32712	-51.15164	-39.12088
-47.53955	85	-37.3135	-51.24021	-39.10848
-47.70078	86	-37.30042	-51.28456	-39.09639
-47.8544	87	-37.28787	-51.28308	-39.08463
-47.99915	88	-37.27588	-51.2356	-39.07319
-48.13369	89	-37.26443	-51.1435	-39.06208
-48.25672	90	-37.25353	-51.00945	-39.05132
-48.36693	91	-37.24318	-50.83725	-39.04092
-48.46304	92	-37.23339	-50.63142	-39.03087
-48.5439	93	-37.22416	-50.3969	-39.02119
-48.60847	94	-37.21549	-50.13869	-39.01188
-48.65587	95	-37.20738	-49.8616	-39.00296
-48.68543	96	-37.19983	-49.57011	-38.99441
-48.69672	97	-37.19284	-49.26819	-38.98626
-48.68952	98	-37.18642	-48.95932	-38.97851
-48.66391	99	-37.18056	-48.64646	-38.97115
-48.62019	100	-37.17525	-48.33205	-38.9642
-48.55893	101	-37.17051	-48.01811	-38.95766
-48.48088	102	-37.16633	-47.70627	-38.95154
-48.38701	103	-37.1627	-47.39781	-38.94582
-48.27842	104	-37.15963	-47.09372	-38.94053
-48.15632	105	-37.15711	-46.79478	-38.93566
-48.02201	106	-37.15513	-46.50155	-38.93121
-47.87679	107	-37.1537	-46.21444	-38.92718
-47.72201	108	-37.15281	-45.93374	-38.92358
-47.55895	109	-37.15246	-45.65963	-38.92041
-47.38887	110	-37.15264	-45.39221	-38.91766
-47.21295	111	-37.15334	-45.13152	-38.91534
-47.0323	112	-37.15457	-44.87754	-38.91345
-46.84795	113	-37.15631	-44.63023	-38.91199
-46.66083	114	-37.15856	-44.3895	-38.91096
-46.47179	115	-37.16131	-44.15526	-38.91034
-46.28159	116	-37.16456	-43.92738	-38.91016
-46.09091	117	-37.1683	-43.70574	-38.91039
-45.90034	118	-37.17252	-43.49021	-38.91104
-45.7104	119	-37.17722	-43.28063	-38.91211
-45.52157	120	-37.18238	-43.07688	-38.91359
-45.33423	121	-37.188	-42.8788	-38.91549
-45.14872	122	-37.19407	-42.68625	-38.91779
-44.96535	123	-37.20057	-42.49909	-38.92049
-44.78434	124	-37.20751	-42.31719	-38.92359
-44.60592	125	-37.21487	-42.1404	-38.92709
-44.43026	126	-37.22264	-41.96861	-38.93098
-44.25751	127	-37.23081	-41.80168	-38.93525
-44.08777	128	-37.23938	-41.63948	-38.9399
-43.92115	129	-37.24832	-41.48191	-38.94492
-43.75772	130	-37.25764	-41.32884	-38.95031
-43.59754	131	-37.26731	-41.18018	-38.95606
-43.44064	132	-37.27733	-41.03581	-38.96216
-43.28707	133	-37.28769	-40.89563	-38.96861
-43.13684	134	-37.29837	-40.75955	-38.9754
-42.98996	135	-37.30936	-40.62747	-38.98252
-42.84643	136	-37.32066	-40.49932	-38.98997
-42.70625	137	-37.33224	-40.375	-38.99773
-42.56941	138	-37.3441	-40.25443	-39.00581
-42.43588	139	-37.35622	-40.13754	-39.01418
-42.30565	140	-37.3686	-40.02425	-39.02285
-42.17871	141	-37.38121	-39.9145	-39.03179
-42.05502	142	-37.39405	-39.80821	-39.04102
-41.93455	143	-37.4071	-39.70533	-39.0505
-41.81729	144	-37.42035	-39.6058	-39.06024
-41.7032	145	-37.43378	-39.50955	-39.07023
-41.59224	146	-37.44739	-39.41653	-39.08045
-41.48439	147	-37.46116	-39.32669	-39.0909
-41.37962	148	-37.47508	-39.23998	-39.10157
-41.27789	149	-37.48913	-39.15636	-39.11243
-41.17918	150	-37.50331	-39.07577	-39.1235
-41.08345	151	-37.51759	-38.99818	-39.13474
-40.99067	152	-37.53196	-38.92354	-39.14616
-40.90081	153	-37.54642	-38.85182	-39.15775
-40.81385	154	-37.56094	-38.78298	-39.16948
-40.72975	155	-37.57552	-38.71699	-39.18135
-40.64848	156	-37.59015	-38.65381	-39.19336
-40.57002	157	-37.6048	-38.59341	-39.20548
-40.49434	158	-37.61947	-38.53577	-39.2177
-40.42142	159	-37.63415	-38.48085	-39.23003
-40.35122	160	-37.64882	-38.42863	-39.24243
-40.28373	161	-37.66348	-38.37909	-39.25491
-40.21893	162	-37.6781	-38.3322	-39.26745
-40.15679	163	-37.69268	-38.28795	-39.28004
-40.09728	164	-37.70721	-38.2463	-39.29266
-40.0404	165	-37.72167	-38.20725	-39.30532
-39.98611	166	-37.73605	-38.17078	-39.31798
-39.93441	167	-37.75035	-38.13687	-39.33066
-39.88527	168	-37.76456	-38.1055	-39.34332
-39.83868	169	-37.77866	-38.07667	-39.35596
-39.79462	170	-37.79264	-38.05036	-39.36858
-39.75308	171	-37.80649	-38.02656	-39.38115
-39.71405	172	-37.82021	-38.00527	-39.39367
-39.67751	173	-37.83379	-37.98646	-39.40613
-39.64345	174	-37.84722	-37.97014	-39.41851
-39.61186	175	-37.86048	-37.9563	-39.43081
-39.58274	176	-37.87358	-37.94494	-39.44301
-39.55606	177	-37.8865	-37.93604	-39.45511
-39.53183	178	-37.89925	-37.92961	-39.46709
-39.51004	179	-37.9118	-37.92565	-39.47895
-39.49067	180	-37.92416	-37.92416	-39.49067
