# Supplementary material for: A Triple-Band Broadband Miniature Antenna Design for Implantable Continuous Glucose Monitoring
Source: Hindawi journal article supplement (doi:10.1155/2023/8123177), 2023-10-13
Supplement: f1 [file 8123177.f1.zip › Figure9(b) (1).txt]

-25.20203	-180	-23.7466	-23.7466	-25.20203
-25.22802	-179	-23.77656	-23.74715	-25.20253
-25.25335	-178	-23.80569	-23.74999	-25.20541
-25.27799	-177	-23.834	-23.75511	-25.21065
-25.30194	-176	-23.86145	-23.76251	-25.21828
-25.32519	-175	-23.88803	-23.77221	-25.2283
-25.34772	-174	-23.91374	-23.78419	-25.2407
-25.36953	-173	-23.93856	-23.79846	-25.25549
-25.3906	-172	-23.96248	-23.81502	-25.27269
-25.41094	-171	-23.9855	-23.83389	-25.2923
-25.43054	-170	-24.00761	-23.85505	-25.31432
-25.4494	-169	-24.0288	-23.87852	-25.33877
-25.46751	-168	-24.04908	-23.9043	-25.36565
-25.48487	-167	-24.06844	-23.9324	-25.39498
-25.50149	-166	-24.08688	-23.96283	-25.42676
-25.51736	-165	-24.10441	-23.99559	-25.46101
-25.53249	-164	-24.12103	-24.03069	-25.49775
-25.54689	-163	-24.13675	-24.06815	-25.53697
-25.56056	-162	-24.15158	-24.10796	-25.57871
-25.57351	-161	-24.16551	-24.15015	-25.62297
-25.58575	-160	-24.17858	-24.19472	-25.66977
-25.59728	-159	-24.19078	-24.24169	-25.71913
-25.60812	-158	-24.20214	-24.29107	-25.77106
-25.61828	-157	-24.21266	-24.34287	-25.82558
-25.62778	-156	-24.22237	-24.39711	-25.88272
-25.63663	-155	-24.23128	-24.4538	-25.9425
-25.64484	-154	-24.23941	-24.51297	-26.00493
-25.65244	-153	-24.24679	-24.57462	-26.07005
-25.65943	-152	-24.25343	-24.63879	-26.13787
-25.66585	-151	-24.25937	-24.70548	-26.20841
-25.6717	-150	-24.26461	-24.77471	-26.28172
-25.67702	-149	-24.2692	-24.84652	-26.35781
-25.68182	-148	-24.27316	-24.92092	-26.43672
-25.68612	-147	-24.27651	-24.99793	-26.51847
-25.68995	-146	-24.27928	-25.07759	-26.6031
-25.69333	-145	-24.2815	-25.15991	-26.69064
-25.69629	-144	-24.28321	-25.24492	-26.78113
-25.69885	-143	-24.28442	-25.33265	-26.8746
-25.70103	-142	-24.28519	-25.42313	-26.97109
-25.70287	-141	-24.28553	-25.51638	-27.07063
-25.70439	-140	-24.28547	-25.61245	-27.17328
-25.70562	-139	-24.28506	-25.71136	-27.27908
-25.70658	-138	-24.28433	-25.81314	-27.38806
-25.7073	-137	-24.2833	-25.91782	-27.50027
-25.70782	-136	-24.28201	-26.02545	-27.61577
-25.70815	-135	-24.2805	-26.13605	-27.7346
-25.70833	-134	-24.2788	-26.24967	-27.85681
-25.70838	-133	-24.27694	-26.36633	-27.98246
-25.70834	-132	-24.27496	-26.48607	-28.11159
-25.70823	-131	-24.2729	-26.60894	-28.24427
-25.70808	-130	-24.27077	-26.73497	-28.38056
-25.70791	-129	-24.26863	-26.8642	-28.5205
-25.70777	-128	-24.26649	-26.99665	-28.66416
-25.70766	-127	-24.26441	-27.13238	-28.81161
-25.70763	-126	-24.2624	-27.27141	-28.9629
-25.70769	-125	-24.2605	-27.41377	-29.11809
-25.70788	-124	-24.25874	-27.55951	-29.27724
-25.70823	-123	-24.25715	-27.70864	-29.44043
-25.70875	-122	-24.25577	-27.86119	-29.6077
-25.70947	-121	-24.25462	-28.01719	-29.77911
-25.71043	-120	-24.25374	-28.17664	-29.95473
-25.71164	-119	-24.25315	-28.33956	-30.13459
-25.71312	-118	-24.25288	-28.50595	-30.31875
-25.71491	-117	-24.25296	-28.67581	-30.50725
-25.71702	-116	-24.25341	-28.84911	-30.70013
-25.71948	-115	-24.25427	-29.02583	-30.89739
-25.72231	-114	-24.25555	-29.20592	-31.09905
-25.72553	-113	-24.25729	-29.38931	-31.30511
-25.72916	-112	-24.2595	-29.57594	-31.51553
-25.73322	-111	-24.26221	-29.76568	-31.73026
-25.73773	-110	-24.26544	-29.95841	-31.94924
-25.74271	-109	-24.26921	-30.15396	-32.17233
-25.74817	-108	-24.27354	-30.35213	-32.3994
-25.75412	-107	-24.27845	-30.55266	-32.63023
-25.7606	-106	-24.28397	-30.75528	-32.86458
-25.76761	-105	-24.29009	-30.95963	-33.1021
-25.77516	-104	-24.29685	-31.16531	-33.3424
-25.78327	-103	-24.30426	-31.37184	-33.58498
-25.79194	-102	-24.31233	-31.57866	-33.82923
-25.8012	-101	-24.32107	-31.78515	-34.07443
-25.81105	-100	-24.3305	-31.99056	-34.31971
-25.8215	-99	-24.34062	-32.19409	-34.56407
-25.83255	-98	-24.35145	-32.3948	-34.80632
-25.84422	-97	-24.363	-32.59166	-35.0451
-25.85651	-96	-24.37527	-32.78352	-35.27885
-25.86943	-95	-24.38827	-32.96916	-35.50583
-25.88298	-94	-24.402	-33.14722	-35.72409
-25.89716	-93	-24.41648	-33.31629	-35.93153
-25.91197	-92	-24.43169	-33.47489	-36.1259
-25.92742	-91	-24.44765	-33.6215	-36.30484
-25.9435	-90	-24.46435	-33.75462	-36.46599
-25.96022	-89	-24.48179	-33.87275	-36.60699
-25.97757	-88	-24.49997	-33.97453	-36.72567
-25.99555	-87	-24.5189	-34.0587	-36.82008
-26.01415	-86	-24.53855	-34.12419	-36.88861
-26.03336	-85	-24.55893	-34.17017	-36.93012
-26.05318	-84	-24.58003	-34.19606	-36.94394
-26.07361	-83	-24.60185	-34.2016	-36.92997
-26.09463	-82	-24.62436	-34.18681	-36.88868
-26.11622	-81	-24.64757	-34.15202	-36.82104
-26.13839	-80	-24.67145	-34.09787	-36.7285
-26.16111	-79	-24.696	-34.02523	-36.61289
-26.18437	-78	-24.7212	-33.93522	-36.47633
-26.20816	-77	-24.74703	-33.82911	-36.32111
-26.23246	-76	-24.77348	-33.70833	-36.14961
-26.25724	-75	-24.80052	-33.57435	-35.9642
-26.2825	-74	-24.82814	-33.4287	-35.76716
-26.30821	-73	-24.85631	-33.2729	-35.56067
-26.33435	-72	-24.88501	-33.10842	-35.34674
-26.3609	-71	-24.91421	-32.93668	-35.12718
-26.38783	-70	-24.94389	-32.75901	-34.90361
-26.41511	-69	-24.97403	-32.57663	-34.67748
-26.44273	-68	-25.00458	-32.39066	-34.45003
-26.47065	-67	-25.03552	-32.20214	-34.22234
-26.49884	-66	-25.06682	-32.01198	-33.99532
-26.52728	-65	-25.09844	-31.82098	-33.76976
-26.55593	-64	-25.13036	-31.62986	-33.54628
-26.58476	-63	-25.16252	-31.43926	-33.32545
-26.61374	-62	-25.19491	-31.2497	-33.10768
-26.64283	-61	-25.22746	-31.06167	-32.89335
-26.672	-60	-25.26015	-30.87556	-32.68273
-26.7012	-59	-25.29294	-30.69172	-32.47606
-26.73042	-58	-25.32578	-30.51043	-32.2735
-26.75959	-57	-25.35862	-30.33195	-32.07518
-26.78869	-56	-25.39142	-30.15646	-31.88119
-26.81768	-55	-25.42414	-29.98413	-31.69161
-26.84651	-54	-25.45673	-29.8151	-31.50646
-26.87515	-53	-25.48913	-29.64948	-31.32577
-26.90355	-52	-25.5213	-29.48735	-31.14953
-26.93166	-51	-25.55318	-29.32878	-30.97773
-26.95945	-50	-25.58473	-29.1738	-30.81035
-26.98687	-49	-25.6159	-29.02247	-30.64735
-27.01387	-48	-25.64663	-28.87479	-30.48869
-27.04042	-47	-25.67686	-28.73077	-30.33432
-27.06646	-46	-25.70654	-28.59043	-30.1842
-27.09195	-45	-25.73563	-28.45375	-30.03827
-27.11685	-44	-25.76405	-28.32072	-29.89647
-27.14111	-43	-25.79177	-28.19133	-29.75876
-27.16469	-42	-25.81871	-28.06555	-29.62507
-27.18754	-41	-25.84484	-27.94336	-29.49534
-27.20961	-40	-25.87009	-27.82474	-29.36953
-27.23087	-39	-25.89441	-27.70965	-29.24757
-27.25126	-38	-25.91774	-27.59808	-29.1294
-27.27075	-37	-25.94003	-27.48997	-29.01499
-27.2893	-36	-25.96124	-27.38532	-28.90426
-27.30685	-35	-25.9813	-27.28407	-28.79718
-27.32337	-34	-26.00016	-27.18621	-28.69369
-27.33883	-33	-26.01778	-27.0917	-28.59375
-27.35317	-32	-26.03411	-27.0005	-28.49731
-27.36637	-31	-26.0491	-26.9126	-28.40432
-27.37839	-30	-26.0627	-26.82794	-28.31476
-27.38918	-29	-26.07487	-26.74652	-28.22856
-27.39873	-28	-26.08556	-26.66829	-28.14571
-27.40699	-27	-26.09475	-26.59324	-28.06615
-27.41394	-26	-26.10238	-26.52132	-27.98986
-27.41955	-25	-26.10842	-26.45252	-27.91681
-27.42378	-24	-26.11285	-26.38682	-27.84696
-27.42663	-23	-26.11561	-26.32418	-27.78028
-27.42805	-22	-26.1167	-26.26458	-27.71676
-27.42803	-21	-26.11608	-26.20801	-27.65635
-27.42656	-20	-26.11372	-26.15444	-27.59904
-27.42361	-19	-26.10961	-26.10385	-27.54481
-27.41917	-18	-26.10372	-26.05623	-27.49364
-27.41322	-17	-26.09605	-26.01155	-27.4455
-27.40576	-16	-26.08658	-25.9698	-27.40038
-27.39678	-15	-26.07529	-25.93096	-27.35826
-27.38627	-14	-26.06219	-25.89502	-27.31913
-27.37422	-13	-26.04726	-25.86197	-27.28297
-27.36064	-12	-26.03051	-25.83179	-27.24978
-27.34552	-11	-26.01194	-25.80448	-27.21954
-27.32887	-10	-25.99156	-25.78001	-27.19225
-27.3107	-9	-25.96936	-25.7584	-27.16789
-27.291	-8	-25.94537	-25.73962	-27.14647
-27.26979	-7	-25.91959	-25.72367	-27.12796
-27.24708	-6	-25.89205	-25.71054	-27.11239
-27.22289	-5	-25.86276	-25.70024	-27.09973
-27.19722	-4	-25.83174	-25.69275	-27.08998
-27.1701	-3	-25.79902	-25.68807	-27.08316
-27.14155	-2	-25.76462	-25.68621	-27.07926
-27.11159	-1	-25.72858	-25.68716	-27.07828
-27.08023	0	-25.69093	-25.69093	-27.08023
-27.04752	1	-25.6517	-25.69751	-27.08512
-27.01346	2	-25.61092	-25.70691	-27.09294
-26.9781	3	-25.56864	-25.71913	-27.10371
-26.94147	4	-25.5249	-25.73419	-27.11743
-26.90358	5	-25.47973	-25.75207	-27.13413
-26.86449	6	-25.43319	-25.77281	-27.1538
-26.82422	7	-25.38531	-25.79639	-27.17647
-26.7828	8	-25.33615	-25.82283	-27.20214
-26.74028	9	-25.28575	-25.85215	-27.23084
-26.6967	10	-25.23417	-25.88436	-27.26258
-26.65209	11	-25.18144	-25.91947	-27.29738
-26.60649	12	-25.12764	-25.95749	-27.33527
-26.55994	13	-25.0728	-25.99845	-27.37625
-26.51249	14	-25.01698	-26.04236	-27.42037
-26.46418	15	-24.96024	-26.08924	-27.46764
-26.41506	16	-24.90262	-26.13912	-27.51809
-26.36516	17	-24.8442	-26.192	-27.57175
-26.31453	18	-24.78501	-26.24793	-27.62865
-26.26322	19	-24.72512	-26.30693	-27.68882
-26.21126	20	-24.66458	-26.36901	-27.7523
-26.15872	21	-24.60345	-26.43422	-27.81913
-26.10562	22	-24.54179	-26.50259	-27.88935
-26.05202	23	-24.47964	-26.57414	-27.96299
-25.99797	24	-24.41707	-26.64891	-28.0401
-25.9435	25	-24.35412	-26.72694	-28.12073
-25.88867	26	-24.29086	-26.80826	-28.20493
-25.83352	27	-24.22734	-26.89292	-28.29274
-25.77809	28	-24.16361	-26.98097	-28.38423
-25.72242	29	-24.09972	-27.07244	-28.47944
-25.66658	30	-24.03573	-27.16738	-28.57844
-25.61058	31	-23.97168	-27.26584	-28.68129
-25.55449	32	-23.90763	-27.36787	-28.78807
-25.49835	33	-23.84363	-27.47353	-28.89882
-25.44219	34	-23.77973	-27.58288	-29.01364
-25.38606	35	-23.71597	-27.69596	-29.1326
-25.32999	36	-23.6524	-27.81284	-29.25578
-25.27404	37	-23.58907	-27.93359	-29.38326
-25.21824	38	-23.52602	-28.05826	-29.51513
-25.16263	39	-23.4633	-28.18693	-29.65148
-25.10724	40	-23.40094	-28.31966	-29.79241
-25.05213	41	-23.339	-28.45653	-29.93802
-24.99731	42	-23.27751	-28.59759	-30.08841
-24.94283	43	-23.2165	-28.74294	-30.24369
-24.88873	44	-23.15603	-28.89263	-30.40398
-24.83504	45	-23.09612	-29.04674	-30.56939
-24.78179	46	-23.03681	-29.20535	-30.74003
-24.72902	47	-22.97814	-29.36852	-30.91604
-24.67675	48	-22.92014	-29.53632	-31.09753
-24.62503	49	-22.86284	-29.70883	-31.28464
-24.57387	50	-22.80628	-29.88609	-31.47749
-24.52331	51	-22.75048	-30.06817	-31.6762
-24.47338	52	-22.69547	-30.25511	-31.88091
-24.4241	53	-22.64129	-30.44694	-32.09173
-24.3755	54	-22.58796	-30.64367	-32.30879
-24.32761	55	-22.53551	-30.84532	-32.53217
-24.28046	56	-22.48395	-31.05186	-32.76198
-24.23406	57	-22.43333	-31.26325	-32.99828
-24.18844	58	-22.38364	-31.47939	-33.24113
-24.14362	59	-22.33493	-31.70016	-33.49053
-24.09962	60	-22.28721	-31.92539	-33.74645
-24.05647	61	-22.24051	-32.15485	-34.00881
-24.01419	62	-22.19483	-32.38824	-34.27746
-23.97279	63	-22.1502	-32.62515	-34.55214
-23.93229	64	-22.10663	-32.8651	-34.83251
-23.8927	65	-22.06415	-33.10747	-35.11808
-23.85406	66	-22.02276	-33.35153	-35.40818
-23.81637	67	-21.98249	-33.59637	-35.70198
-23.77964	68	-21.94334	-33.84089	-35.99835
-23.7439	69	-21.90534	-34.08382	-36.29591
-23.70915	70	-21.86848	-34.32365	-36.59293
-23.67541	71	-21.83279	-34.55863	-36.88728
-23.64268	72	-21.79826	-34.78677	-37.17642
-23.611	73	-21.76493	-35.00585	-37.45731
-23.58035	74	-21.73278	-35.21339	-37.72646
-23.55075	75	-21.70184	-35.40673	-37.97988
-23.52222	76	-21.6721	-35.58309	-38.21322
-23.49476	77	-21.64358	-35.73959	-38.42185
-23.46838	78	-21.61629	-35.87344	-38.60104
-23.44308	79	-21.59022	-35.982	-38.74625
-23.41888	80	-21.56538	-36.06294	-38.85344
-23.39578	81	-21.54178	-36.1144	-38.91935
-23.37378	82	-21.51943	-36.13507	-38.94183
-23.35289	83	-21.49832	-36.12432	-38.92001
-23.33312	84	-21.47845	-36.08221	-38.85442
-23.31446	85	-21.45984	-36.00951	-38.7469
-23.29693	86	-21.44248	-35.90763	-38.60045
-23.28051	87	-21.42638	-35.77854	-38.41897
-23.26523	88	-21.41152	-35.62463	-38.20689
-23.25107	89	-21.39792	-35.44856	-37.96889
-23.23804	90	-21.38558	-35.25317	-37.70964
-23.22613	91	-21.37448	-35.04129	-37.43358
-23.21535	92	-21.36464	-34.81571	-37.14478
-23.2057	93	-21.35604	-34.57905	-36.84683
-23.19718	94	-21.34869	-34.33371	-36.54288
-23.18977	95	-21.34259	-34.0819	-36.23557
-23.18349	96	-21.33772	-33.82555	-35.92713
-23.17833	97	-21.33409	-33.56634	-35.61936
-23.17428	98	-21.33168	-33.30575	-35.31372
-23.17133	99	-21.33051	-33.045	-35.01138
-23.1695	100	-21.33055	-32.78516	-34.71322
-23.16876	101	-21.3318	-32.52708	-34.41996
-23.16912	102	-21.33427	-32.27148	-34.1321
-23.17056	103	-21.33793	-32.01894	-33.85002
-23.17308	104	-21.34278	-31.76994	-33.57398
-23.17668	105	-21.34882	-31.52483	-33.30414
-23.18134	106	-21.35603	-31.28391	-33.0406
-23.18706	107	-21.3644	-31.0474	-32.7834
-23.19382	108	-21.37394	-30.81544	-32.53251
-23.20162	109	-21.38461	-30.58817	-32.2879
-23.21045	110	-21.39642	-30.36564	-32.04948
-23.2203	111	-21.40936	-30.14789	-31.81717
-23.23115	112	-21.4234	-29.93494	-31.59086
-23.24299	113	-21.43854	-29.72678	-31.37042
-23.25582	114	-21.45477	-29.52339	-31.15574
-23.26961	115	-21.47207	-29.32471	-30.94667
-23.28435	116	-21.49042	-29.13071	-30.74308
-23.30004	117	-21.50982	-28.94131	-30.54484
-23.31665	118	-21.53024	-28.75647	-30.35182
-23.33417	119	-21.55167	-28.5761	-30.16388
-23.35258	120	-21.57409	-28.40013	-29.9809
-23.37187	121	-21.59749	-28.22848	-29.80274
-23.39202	122	-21.62185	-28.06109	-29.62929
-23.41302	123	-21.64715	-27.89786	-29.46042
-23.43483	124	-21.67336	-27.73873	-29.29602
-23.45746	125	-21.70048	-27.58361	-29.13598
-23.48087	126	-21.72847	-27.43244	-28.9802
-23.50504	127	-21.75732	-27.28513	-28.82857
-23.52997	128	-21.78701	-27.14161	-28.68099
-23.55561	129	-21.81751	-27.00182	-28.53736
-23.58196	130	-21.84879	-26.86568	-28.39761
-23.60899	131	-21.88085	-26.73312	-28.26164
-23.63668	132	-21.91364	-26.60409	-28.12936
-23.66501	133	-21.94715	-26.47852	-28.00071
-23.69394	134	-21.98135	-26.35635	-27.87561
-23.72346	135	-22.01621	-26.23751	-27.75398
-23.75355	136	-22.0517	-26.12196	-27.63576
-23.78417	137	-22.0878	-26.00964	-27.52089
-23.8153	138	-22.12449	-25.9005	-27.40929
-23.84692	139	-22.16172	-25.79448	-27.30092
-23.87899	140	-22.19946	-25.69155	-27.19572
-23.9115	141	-22.2377	-25.59165	-27.09363
-23.9444	142	-22.2764	-25.49474	-26.9946
-23.97769	143	-22.31552	-25.40078	-26.8986
-24.01132	144	-22.35503	-25.30972	-26.80556
-24.04526	145	-22.39491	-25.22154	-26.71546
-24.0795	146	-22.43511	-25.13619	-26.62824
-24.11399	147	-22.47561	-25.05364	-26.54387
-24.14871	148	-22.51637	-24.97385	-26.46231
-24.18364	149	-22.55735	-24.8968	-26.38354
-24.21873	150	-22.59853	-24.82245	-26.30751
-24.25396	151	-22.63986	-24.75077	-26.2342
-24.2893	152	-22.6813	-24.68173	-26.16357
-24.32471	153	-22.72284	-24.61532	-26.0956
-24.36018	154	-22.76442	-24.5515	-26.03027
-24.39566	155	-22.80601	-24.49025	-25.96754
-24.43112	156	-22.84757	-24.43155	-25.90741
-24.46654	157	-22.88908	-24.37538	-25.84983
-24.50188	158	-22.93049	-24.32172	-25.79481
-24.53712	159	-22.97176	-24.27054	-25.74231
-24.57222	160	-23.01286	-24.22183	-25.69231
-24.60715	161	-23.05376	-24.17557	-25.64482
-24.64188	162	-23.09441	-24.13176	-25.5998
-24.67639	163	-23.13478	-24.09036	-25.55724
-24.71064	164	-23.17485	-24.05137	-25.51713
-24.7446	165	-23.21456	-24.01478	-25.47947
-24.77826	166	-23.25389	-23.98056	-25.44423
-24.81157	167	-23.2928	-23.94872	-25.41141
-24.84451	168	-23.33126	-23.91924	-25.381
-24.87705	169	-23.36924	-23.8921	-25.353
-24.90918	170	-23.4067	-23.86731	-25.32739
-24.94085	171	-23.44361	-23.84485	-25.30416
-24.97206	172	-23.47995	-23.82471	-25.28332
-25.00277	173	-23.51569	-23.80689	-25.26486
-25.03296	174	-23.55079	-23.79138	-25.24878
-25.06261	175	-23.58522	-23.77818	-25.23506
-25.09169	176	-23.61897	-23.76728	-25.22372
-25.1202	177	-23.65201	-23.75867	-25.21475
-25.1481	178	-23.6843	-23.75236	-25.20814
-25.17538	179	-23.71584	-23.74834	-25.2039
-25.20203	180	-23.7466	-23.7466	-25.20203
