# Supplementary material for: A Triple-Band Broadband Miniature Antenna Design for Implantable Continuous Glucose Monitoring
Source: Hindawi journal article supplement (doi:10.1155/2023/8123177), 2023-10-13
Supplement: f1 [file 8123177.f1.zip › Figure9(c) (1).txt]

Theta [deg]	dB(GainTotal) [] - Freq='2.45GHz' Phi='0deg'	dB(GainTotal) [] - Freq='2.45GHz' Phi='90deg'	dB(GainTotal) [] - Freq='2.45GHz' Phi='0deg'	dB(GainTotal) [] - Freq='2.45GHz' Phi='90deg'
-180	-25.4952	-25.4952	-27.4952	-26.9952
-179	-25.49472	-25.51444	-27.49472	-27.01444
-178	-25.49375	-25.53599	-27.49375	-27.03599
-177	-25.49224	-25.5599	-27.49224	-27.0599
-176	-25.49008	-25.5862	-27.49008	-27.0862
-175	-25.48718	-25.61494	-27.48718	-27.11494
-174	-25.48341	-25.64613	-27.48341	-27.14613
-173	-25.47861	-25.67979	-27.47861	-27.17979
-172	-25.47263	-25.71593	-27.47263	-27.21593
-171	-25.46528	-25.75456	-27.46528	-27.25456
-170	-25.45638	-25.79565	-27.45638	-27.29565
-169	-25.44573	-25.83919	-27.44573	-27.33919
-168	-25.43312	-25.88517	-27.43312	-27.38517
-167	-25.41835	-25.93354	-27.41835	-27.43354
-166	-25.40119	-25.98425	-27.40119	-27.48425
-165	-25.38146	-26.03727	-27.38146	-27.53727
-164	-25.35895	-26.09252	-27.35895	-27.59252
-163	-25.33348	-26.14994	-27.33348	-27.64994
-162	-25.30487	-26.20944	-27.30487	-27.70944
-161	-25.27296	-26.27094	-27.27296	-27.77094
-160	-25.23763	-26.33434	-27.23763	-27.83434
-159	-25.19876	-26.39954	-27.19876	-27.89954
-158	-25.15626	-26.46641	-27.15626	-27.96641
-157	-25.11008	-26.53484	-27.11008	-28.03484
-156	-25.06019	-26.60468	-27.06019	-28.10468
-155	-25.00658	-26.6758	-27.00658	-28.1758
-154	-24.9493	-26.74805	-26.9493	-28.24805
-153	-24.88838	-26.82125	-26.88838	-28.32125
-152	-24.82394	-26.89524	-26.82394	-28.39524
-151	-24.75607	-26.96984	-26.75607	-28.46984
-150	-24.68491	-27.04486	-26.68491	-28.54486
-149	-24.61064	-27.12009	-26.61064	-28.62009
-148	-24.53343	-27.19534	-26.53343	-28.69534
-147	-24.45348	-27.27038	-26.45348	-28.77038
-146	-24.37101	-27.34498	-26.37101	-28.84498
-145	-24.28624	-27.41893	-26.28624	-28.91893
-144	-24.19941	-27.49196	-26.19941	-28.99196
-143	-24.11076	-27.56383	-26.11076	-29.06383
-142	-24.02053	-27.6343	-26.02053	-29.1343
-141	-23.92896	-27.70308	-25.92896	-29.20308
-140	-23.8363	-27.76993	-25.8363	-29.26993
-139	-23.74279	-27.83458	-25.74279	-29.33458
-138	-23.64865	-27.89674	-25.64865	-29.39674
-137	-23.5541	-27.95614	-25.5541	-29.45614
-136	-23.45937	-28.01252	-25.45937	-29.51252
-135	-23.36465	-28.06561	-25.36465	-29.56561
-134	-23.27014	-28.11513	-25.27014	-29.61513
-133	-23.17601	-28.16084	-25.17601	-29.66084
-132	-23.08244	-28.20248	-25.08244	-29.70248
-131	-22.98957	-28.23981	-24.98957	-29.73981
-130	-22.89756	-28.27261	-24.89756	-29.77261
-129	-22.80652	-28.30068	-24.80652	-29.80068
-128	-22.71659	-28.32381	-24.71659	-29.82381
-127	-22.62785	-28.34184	-24.62785	-29.84184
-126	-22.54042	-28.35463	-24.54042	-29.85463
-125	-22.45436	-28.36204	-24.45436	-29.86204
-124	-22.36975	-28.36398	-24.36975	-29.86398
-123	-22.28666	-28.36038	-24.28666	-29.86038
-122	-22.20512	-28.35119	-24.20512	-29.85119
-121	-22.12519	-28.33639	-24.12519	-29.83639
-120	-22.0469	-28.31601	-24.0469	-29.81601
-119	-21.97028	-28.29007	-23.97028	-29.79007
-118	-21.89534	-28.25865	-23.89534	-29.75865
-117	-21.82209	-28.22184	-23.82209	-29.72184
-116	-21.75054	-28.17975	-23.75054	-29.67975
-115	-21.68068	-28.13253	-23.68068	-29.63253
-114	-21.61253	-28.08033	-23.61253	-29.58033
-113	-21.54605	-28.02334	-23.54605	-29.52334
-112	-21.48124	-27.96175	-23.48124	-29.46175
-111	-21.41809	-27.89577	-23.41809	-29.39577
-110	-21.35656	-27.82563	-23.35656	-29.32563
-109	-21.29664	-27.75155	-23.29664	-29.25155
-108	-21.2383	-27.67377	-23.2383	-29.17377
-107	-21.18151	-27.59254	-23.18151	-29.09254
-106	-21.12625	-27.5081	-23.12625	-29.0081
-105	-21.07247	-27.42069	-23.07247	-28.92069
-104	-21.02015	-27.33057	-23.02015	-28.83057
-103	-20.96925	-27.23797	-22.96925	-28.73797
-102	-20.91975	-27.14313	-22.91975	-28.64313
-101	-20.8716	-27.04628	-22.8716	-28.54628
-100	-20.82477	-26.94766	-22.82477	-28.44766
-99	-20.77924	-26.84747	-22.77924	-28.34747
-98	-20.73496	-26.74594	-22.73496	-28.24594
-97	-20.6919	-26.64326	-22.6919	-28.14326
-96	-20.65003	-26.53964	-22.65003	-28.03964
-95	-20.60932	-26.43525	-22.60932	-27.93525
-94	-20.56975	-26.33028	-22.56975	-27.83028
-93	-20.53127	-26.22489	-22.53127	-27.72489
-92	-20.49386	-26.11925	-22.49386	-27.61925
-91	-20.45749	-26.01351	-22.45749	-27.51351
-90	-20.42215	-25.90781	-22.42215	-27.40781
-89	-20.3878	-25.80228	-22.3878	-27.30228
-88	-20.35441	-25.69705	-22.35441	-27.19705
-87	-20.32198	-25.59225	-22.32198	-27.09225
-86	-20.29047	-25.48797	-22.29047	-26.98797
-85	-20.25987	-25.38433	-22.25987	-26.88433
-84	-20.23017	-25.28141	-21.73017	-26.78141
-83	-20.20133	-25.17932	-21.70133	-26.67932
-82	-20.17335	-25.07812	-21.67335	-26.57812
-81	-20.14621	-24.9779	-21.64621	-26.4779
-80	-20.11991	-24.87873	-21.61991	-26.37873
-79	-20.09442	-24.78067	-21.59442	-26.28067
-78	-20.06973	-24.68378	-21.56973	-26.18378
-77	-20.04585	-24.58811	-21.54585	-26.08811
-76	-20.02274	-24.4937	-21.52274	-25.9937
-75	-20.00042	-24.4006	-21.50042	-25.9006
-74	-19.97886	-24.30884	-21.47886	-25.80884
-73	-19.95807	-24.21845	-21.45807	-25.71845
-72	-19.93803	-24.12946	-21.43803	-25.62946
-71	-19.91874	-24.04189	-21.41874	-25.54189
-70	-19.90019	-23.95575	-21.40019	-25.45575
-69	-19.88238	-23.87106	-21.38238	-25.37106
-68	-19.8653	-23.78781	-21.3653	-25.28781
-67	-19.84895	-23.70601	-21.34895	-25.20601
-66	-19.83332	-23.62566	-21.33332	-25.12566
-65	-19.81841	-23.54674	-21.31841	-25.04674
-64	-19.80421	-23.46925	-21.30421	-24.96925
-63	-19.79071	-23.39317	-21.29071	-24.89317
-62	-19.77792	-23.31847	-21.27792	-24.81847
-61	-19.76583	-23.24514	-21.26583	-24.74514
-60	-19.75442	-23.17313	-21.25442	-24.67313
-59	-19.7437	-23.10243	-21.2437	-24.60243
-58	-19.73366	-23.03299	-21.23366	-24.53299
-57	-19.72429	-22.96478	-21.22429	-24.46478
-56	-19.7156	-22.89775	-21.2156	-24.39775
-55	-19.70756	-22.83186	-21.20756	-24.33186
-54	-19.70018	-22.76705	-21.20018	-24.26705
-53	-19.69344	-22.70329	-21.19344	-24.20329
-52	-19.68734	-22.64051	-21.18734	-24.14051
-51	-19.68188	-22.57866	-21.18188	-24.07866
-50	-19.67704	-22.51769	-21.17704	-24.01769
-49	-19.67282	-22.45754	-21.17282	-23.95754
-48	-19.66921	-22.39816	-21.16921	-23.89816
-47	-19.6662	-22.33948	-21.1662	-23.83948
-46	-19.66378	-22.28146	-21.16378	-23.78146
-45	-19.66195	-22.22402	-21.16195	-23.72402
-44	-19.66069	-22.16713	-21.16069	-23.66713
-43	-19.65999	-22.11072	-21.15999	-23.61072
-42	-19.65986	-22.05475	-21.15986	-23.55475
-41	-19.66027	-21.99916	-21.16027	-23.49916
-40	-19.66122	-21.94391	-21.16122	-23.44391
-39	-19.66271	-21.88896	-21.16271	-23.38896
-38	-19.66471	-21.83426	-21.16471	-23.33426
-37	-19.66723	-21.77979	-21.16723	-23.27979
-36	-19.67026	-21.7255	-21.17026	-23.2255
-35	-19.67378	-21.67138	-21.17378	-23.17138
-34	-19.67779	-21.6174	-21.17779	-23.1174
-33	-19.68227	-21.56355	-21.18227	-23.06355
-32	-19.68723	-21.50981	-21.18723	-23.00981
-31	-19.69265	-21.45619	-21.19265	-22.95619
-30	-19.69853	-21.40267	-21.19853	-22.90267
-29	-19.70485	-21.34927	-21.20485	-22.84927
-28	-19.71161	-21.29601	-21.21161	-22.79601
-27	-19.7188	-21.24289	-21.2188	-22.74289
-26	-19.72642	-21.18995	-21.22642	-22.68995
-25	-19.73445	-21.13721	-21.23445	-22.63721
-24	-19.74289	-21.0847	-21.24289	-22.5847
-23	-19.75173	-21.03247	-21.25173	-22.53247
-22	-19.76097	-20.98057	-21.26097	-22.48057
-21	-19.77059	-20.92903	-21.27059	-22.42903
-20	-19.78059	-20.87792	-21.28059	-22.37792
-19	-19.79097	-20.8273	-21.29097	-22.3273
-18	-19.80171	-20.77722	-21.30171	-22.27722
-17	-19.81281	-20.72775	-21.31281	-22.22775
-16	-19.82427	-20.67896	-21.32427	-22.17896
-15	-19.83607	-20.63092	-21.33607	-22.13092
-14	-19.84821	-20.58369	-21.34821	-22.08369
-13	-19.86068	-20.53736	-21.36068	-22.03736
-12	-19.87348	-20.492	-21.37348	-21.992
-11	-19.88659	-20.44767	-21.38659	-21.94767
-10	-19.90002	-20.40447	-21.40002	-21.90447
-9	-19.91375	-20.36245	-21.41375	-21.86245
-8	-19.92777	-20.3217	-21.42777	-21.8217
-7	-19.94208	-20.28228	-21.44208	-21.78228
-6	-19.95667	-20.24428	-21.45667	-21.74428
-5	-19.97152	-20.20775	-21.47152	-21.70775
-4	-19.98664	-20.17277	-21.48664	-21.67277
-3	-20.00201	-20.13939	-21.50201	-21.63939
-2	-20.01763	-20.10769	-21.51763	-21.60769
-1	-20.03347	-20.07772	-21.53347	-21.57772
0	-20.04954	-20.04954	-21.54954	-21.54954
1	-20.06582	-20.0232	-21.56582	-21.5232
2	-20.0823	-19.99876	-21.5823	-21.49876
3	-20.09897	-19.97624	-21.59897	-21.47624
4	-20.11582	-19.95571	-21.61582	-21.45571
5	-20.13283	-19.93719	-21.63283	-21.43719
6	-20.15	-19.92073	-21.65	-21.42073
7	-20.1673	-19.90635	-21.6673	-21.40635
8	-20.18473	-19.89408	-21.68473	-21.39408
9	-20.20228	-19.88394	-21.70228	-21.38394
10	-20.21992	-19.87595	-21.71992	-21.37595
11	-20.23765	-19.87013	-21.73765	-21.37013
12	-20.25545	-19.86649	-21.75545	-21.36649
13	-20.2733	-19.86503	-21.7733	-21.36503
14	-20.2912	-19.86577	-21.7912	-21.36577
15	-20.30912	-19.8687	-21.80912	-21.3687
16	-20.32706	-19.87382	-21.82706	-21.37382
17	-20.345	-19.88112	-21.845	-21.38112
18	-20.36292	-19.89061	-21.86292	-20.89061
19	-20.38082	-19.90225	-21.88082	-20.90225
20	-20.39867	-19.91605	-21.89867	-20.91605
21	-20.41647	-19.93199	-21.91647	-20.93199
22	-20.43419	-19.95004	-21.93419	-20.95004
23	-20.45184	-19.9702	-21.95184	-20.9702
24	-20.4694	-19.99242	-21.9694	-20.99242
25	-20.48685	-20.01669	-21.98685	-21.01669
26	-20.50419	-20.04299	-22.00419	-21.04299
27	-20.5214	-20.07129	-22.0214	-21.07129
28	-20.53848	-20.10155	-22.03848	-21.10155
29	-20.55542	-20.13375	-22.05542	-21.13375
30	-20.57221	-20.16786	-22.07221	-21.16786
31	-20.58885	-20.20385	-22.08885	-21.20385
32	-20.60533	-20.24168	-22.10533	-21.24168
33	-20.62164	-20.28133	-22.12164	-21.28133
34	-20.63779	-20.32275	-22.13779	-21.32275
35	-20.65376	-20.36592	-22.15376	-21.36592
36	-20.66957	-20.41081	-22.16957	-21.41081
37	-20.6852	-20.45738	-22.1852	-21.45738
38	-20.70066	-20.5056	-22.20066	-21.5056
39	-20.71594	-20.55543	-22.21594	-21.55543
40	-20.73106	-20.60685	-22.23106	-21.60685
41	-20.74602	-20.65981	-22.24602	-21.65981
42	-20.76081	-20.7143	-22.26081	-21.7143
43	-20.77545	-20.77028	-22.27545	-21.77028
44	-20.78994	-20.82771	-22.28994	-21.82771
45	-20.80429	-20.88657	-22.30429	-21.88657
46	-20.81851	-20.94682	-22.31851	-21.94682
47	-20.8326	-21.00843	-22.3326	-22.00843
48	-20.84657	-21.07138	-22.34657	-22.07138
49	-20.86044	-21.13563	-22.36044	-22.13563
50	-20.87421	-21.20115	-22.37421	-22.20115
51	-20.88791	-21.26791	-22.38791	-22.26791
52	-20.90153	-21.33589	-22.40153	-22.33589
53	-20.91509	-21.40504	-22.41509	-22.40504
54	-20.92861	-21.47533	-22.42861	-22.47533
55	-20.9421	-21.54675	-22.4421	-22.54675
56	-20.95557	-21.61924	-22.45557	-22.61924
57	-20.96904	-21.69278	-22.46904	-22.69278
58	-20.98252	-21.76733	-22.48252	-22.76733
59	-20.99603	-21.84286	-22.49603	-22.84286
60	-21.00959	-21.91933	-22.50959	-22.91933
61	-21.02322	-21.99669	-22.52322	-22.99669
62	-21.03692	-22.07492	-22.53692	-23.07492
63	-21.05072	-22.15396	-22.55072	-23.15396
64	-21.06463	-22.23378	-22.56463	-23.23378
65	-21.07868	-22.31432	-22.57868	-23.31432
66	-21.09288	-22.39554	-22.59288	-23.39554
67	-21.10725	-22.47738	-22.60725	-23.47738
68	-21.12181	-22.5598	-22.62181	-23.5598
69	-21.13659	-22.64273	-22.63659	-23.64273
70	-21.15159	-22.72611	-22.65159	-23.72611
71	-21.16685	-22.80989	-22.66685	-23.80989
72	-21.18239	-22.894	-22.68239	-23.894
73	-21.19822	-22.97837	-22.69822	-23.97837
74	-21.21438	-23.06292	-22.71438	-24.06292
75	-21.23087	-23.14758	-22.73087	-24.14758
76	-21.24774	-23.23227	-22.74774	-24.23227
77	-21.26499	-23.31692	-22.76499	-24.31692
78	-21.28267	-23.40143	-22.78267	-24.40143
79	-21.30078	-23.48571	-22.80078	-24.48571
80	-21.31937	-23.56968	-22.81937	-24.56968
81	-21.33846	-23.65324	-22.83846	-24.65324
82	-21.35807	-23.73629	-22.85807	-24.73629
83	-21.37824	-23.81873	-22.87824	-24.81873
84	-21.399	-23.90046	-22.899	-24.90046
85	-21.42037	-23.98137	-22.92037	-24.98137
86	-21.44238	-24.06136	-22.94238	-25.06136
87	-21.46508	-24.14033	-22.96508	-25.14033
88	-21.48848	-24.21815	-22.98848	-25.21815
89	-21.51264	-24.29473	-23.01264	-25.29473
90	-21.53757	-24.36996	-23.03757	-25.36996
91	-21.56331	-24.44372	-23.06331	-25.44372
92	-21.58991	-24.51593	-23.08991	-25.51593
93	-21.61738	-24.58646	-23.11738	-25.58646
94	-21.64578	-24.65523	-23.14578	-25.65523
95	-21.67514	-24.72214	-23.17514	-25.72214
96	-21.70549	-24.7871	-23.20549	-25.7871
97	-21.73687	-24.85002	-23.23687	-25.85002
98	-21.76932	-24.91082	-23.26932	-25.91082
99	-21.80287	-24.96944	-23.30287	-25.96944
100	-21.83757	-25.0258	-23.33757	-26.0258
101	-21.87344	-25.07984	-23.37344	-26.07984
102	-21.91053	-25.13154	-23.41053	-26.13154
103	-21.94887	-25.18083	-23.44887	-26.18083
104	-21.98849	-25.22769	-23.48849	-26.22769
105	-22.02942	-25.27211	-23.52942	-26.27211
106	-22.07171	-25.31408	-23.57171	-26.31408
107	-22.11537	-25.35358	-23.61537	-26.35358
108	-22.16043	-25.39064	-23.66043	-26.39064
109	-22.20692	-25.42528	-23.70692	-26.42528
110	-22.25487	-25.45752	-23.75487	-26.45752
111	-22.3043	-25.48741	-23.8043	-26.48741
112	-22.35521	-25.51498	-23.85521	-26.51498
113	-22.40762	-25.54031	-23.90762	-26.54031
114	-22.46155	-25.56345	-23.96155	-26.56345
115	-22.517	-25.58446	-24.017	-26.58446
116	-22.57397	-25.60344	-24.07397	-26.60344
117	-22.63245	-25.62045	-24.13245	-26.62045
118	-22.69244	-25.63558	-24.19244	-26.63558
119	-22.75391	-25.64893	-24.25391	-26.64893
120	-22.81685	-25.66058	-24.31685	-26.66058
121	-22.88122	-25.67062	-24.38122	-26.67062
122	-22.94699	-25.67914	-24.44699	-26.67914
123	-23.0141	-25.68624	-24.5141	-26.68624
124	-23.08252	-25.692	-24.58252	-26.692
125	-23.15217	-25.69652	-24.65217	-26.69652
126	-23.22299	-25.69987	-24.72299	-26.69987
127	-23.29489	-25.70215	-24.79489	-26.70215
128	-23.36778	-25.70342	-24.86778	-26.70342
129	-23.44157	-25.70376	-24.94157	-26.70376
130	-23.51614	-25.70323	-25.01614	-26.70323
131	-23.59138	-25.70191	-25.09138	-26.70191
132	-23.66714	-25.69985	-25.16714	-26.69985
133	-23.7433	-25.6971	-25.2433	-26.6971
134	-23.81971	-25.69372	-25.31971	-26.69372
135	-23.89619	-25.68973	-25.39619	-26.68973
136	-23.9726	-25.68519	-25.4726	-26.68519
137	-24.04874	-25.68012	-25.54874	-26.68012
138	-24.12444	-25.67455	-25.62444	-26.67455
139	-24.19951	-25.66852	-25.69951	-26.66852
140	-24.27376	-25.66204	-25.77376	-26.66204
141	-24.34699	-25.65513	-25.84699	-26.65513
142	-24.419	-25.64781	-25.919	-26.64781
143	-24.4896	-25.6401	-25.9896	-26.6401
144	-24.55859	-25.63202	-26.05859	-26.63202
145	-24.62578	-25.62358	-26.12578	-26.62358
146	-24.691	-25.6148	-26.191	-26.6148
147	-24.75406	-25.6057	-26.25406	-26.6057
148	-24.8148	-25.59631	-26.3148	-26.59631
149	-24.87308	-25.58664	-26.37308	-26.58664
150	-24.92876	-25.57673	-26.42876	-26.57673
151	-24.98172	-25.56661	-26.48172	-26.56661
152	-25.03187	-25.55632	-26.53187	-26.55632
153	-25.07914	-25.5459	-26.57914	-26.5459
154	-25.12347	-25.53539	-26.62347	-26.53539
155	-25.16482	-25.52485	-26.66482	-26.52485
156	-25.2032	-25.51434	-26.7032	-26.51434
157	-25.23862	-25.50393	-26.73862	-26.50393
158	-25.27112	-25.49367	-26.77112	-26.49367
159	-25.30075	-25.48365	-26.80075	-26.48365
160	-25.32761	-25.47395	-26.82761	-26.47395
161	-25.35178	-25.46465	-26.85178	-26.46465
162	-25.3734	-25.45584	-26.8734	-26.45584
163	-25.3926	-25.44761	-26.8926	-26.44761
164	-25.40951	-25.44007	-26.90951	-26.44007
165	-25.4243	-25.43331	-26.9243	-26.43331
166	-25.43713	-25.42743	-26.93713	-26.42743
167	-25.44817	-25.42255	-26.94817	-26.42255
168	-25.45758	-25.41875	-26.95758	-26.41875
169	-25.46553	-25.41616	-26.96553	-26.41616
170	-25.47219	-25.41487	-26.97219	-26.41487
171	-25.47771	-25.41498	-26.97771	-26.41498
172	-25.48224	-25.41661	-26.98224	-26.41661
173	-25.4859	-25.41985	-26.9859	-26.41985
174	-25.48882	-25.42479	-26.98882	-26.42479
175	-25.49111	-25.43153	-26.99111	-26.43153
176	-25.49284	-25.44017	-26.99284	-26.44017
177	-25.49408	-25.45077	-26.99408	-26.45077
178	-25.49487	-25.46343	-26.99487	-26.46343
179	-25.49525	-25.47822	-26.99525	-26.47822
180	-25.4952	-25.4952	-26.9952	-26.4952
